# Supplementary material for: JACK trial protocol: a phase III multicentre cluster randomised controlled trial of a school-based relationship and sexuality education intervention focusing on young male perspectives
Source: PubMed Central journal article supplement (PMC6067362; doi:10.1136/bmjopen-2018-022128), 2018-07-28
Supplement: bmjopen-2018-022128.draft_revisions.pdf [file bmjopen-2018-022128.draft_revisions.pdf]

# BMJ Open

BMJ Open is committed to open peer review. As part of this commitment we make the peer review history of every article we publish publicly available.

When an article is published we post the peer reviewers' comments and the authors' responses online. We also post the versions of the paper that were used during peer review. These are the versions that the peer review comments apply to.

The versions of the paper that follow are the versions that were submitted during the peer review process. They are not the versions of record or the final published versions. They should not be cited or distributed as the published version of this manuscript.

BMJ Open is an open access journal and the full, final, typeset and author-corrected version of record of the manuscript is available on our site with no access controls, subscription charges or pay-per-view fees (<http://bmjopen.bmj.com>).

If you have any questions on BMJ Open's open peer review process please email [info.bmjopen@bmj.com](mailto:info.bmjopen@bmj.com)

# BMJ Open

## The JACK Trial Protocol: A Phase III multi-centre cluster randomised controlled trial of a school-based relationship and sexuality education intervention focusing on young male perspectives

|                               |                                                                                                                                                                                                                                                                                                                                                                                                                                                                                                                                                                                                                                                                                                                                                                                                                                                                                                                                                                                                                                                                                                                    |
|-------------------------------|--------------------------------------------------------------------------------------------------------------------------------------------------------------------------------------------------------------------------------------------------------------------------------------------------------------------------------------------------------------------------------------------------------------------------------------------------------------------------------------------------------------------------------------------------------------------------------------------------------------------------------------------------------------------------------------------------------------------------------------------------------------------------------------------------------------------------------------------------------------------------------------------------------------------------------------------------------------------------------------------------------------------------------------------------------------------------------------------------------------------|
| Journal:                      | <i>BMJ Open</i>                                                                                                                                                                                                                                                                                                                                                                                                                                                                                                                                                                                                                                                                                                                                                                                                                                                                                                                                                                                                                                                                                                    |
| Manuscript ID                 | bmjopen-2018-022128                                                                                                                                                                                                                                                                                                                                                                                                                                                                                                                                                                                                                                                                                                                                                                                                                                                                                                                                                                                                                                                                                                |
| Article Type:                 | Protocol                                                                                                                                                                                                                                                                                                                                                                                                                                                                                                                                                                                                                                                                                                                                                                                                                                                                                                                                                                                                                                                                                                           |
| Date Submitted by the Author: | 09-Mar-2018                                                                                                                                                                                                                                                                                                                                                                                                                                                                                                                                                                                                                                                                                                                                                                                                                                                                                                                                                                                                                                                                                                        |
| Complete List of Authors:     | Lohan, Maria ; Queens University of Belfast, Aventin, Áine; Queens University of Belfast<br>Clarke, Mike; Queen's University Belfast, Northern Ireland Methodology Hub<br>Curran, Rhonda; Queens University of Belfast<br>Maguire, Lisa; Queens University of Belfast<br>Hunter, Rachael; University College London, Research Dept of Primary Care and Population Health<br>McDowell, Clíona; Northern Ireland Clinical Trials Unit<br>McDaid, Lisa; University of Glasgow, MRC/CSO Social and Public Health Sciences Unit<br>Young, Honor; Cardiff University, Centre for the Development and Evaluation of Complex Interventions<br>White, James; Cardiff University, South East Wales Trials Unit<br>Fletcher, Adam; Cardiff University, School of Social Sciences<br>French, Rebecca ; London School of Hygiene and Tropical Medicine, Social and Environmental Health Research<br>Bonell, Christopher; London School of Hygiene and Tropical Medicine, Public Health and Policy<br>Bailey, Julia; University College London, Primary Care and Population Health<br>O'Hare, Liam; Queens University of Belfast |
| Keywords:                     | PUBLIC HEALTH, Community child health < PAEDIATRICS, SEXUAL MEDICINE, PREVENTIVE MEDICINE                                                                                                                                                                                                                                                                                                                                                                                                                                                                                                                                                                                                                                                                                                                                                                                                                                                                                                                                                                                                                          |
|                               |                                                                                                                                                                                                                                                                                                                                                                                                                                                                                                                                                                                                                                                                                                                                                                                                                                                                                                                                                                                                                                                                                                                    |

SCHOLARONE™  
Manuscripts

1  
2  
3 **The JACK Trial Protocol: A Phase III multi-centre cluster randomised controlled trial of a school-**  
4 **based relationship and sexuality education intervention focusing on young male perspectives**

5 Maria Lohan,<sup>1</sup> Áine Aventin,<sup>1</sup> Mike Clarke,<sup>2,3</sup> Rhonda M Curran,<sup>1</sup> Lisa Maguire,<sup>1</sup> Rachael Hunter,<sup>4</sup>  
6  
7 Cliona McDowell,<sup>3</sup> Lisa McDaid,<sup>5</sup> Honor Young,<sup>6</sup> James White,<sup>6</sup> Adam Fletcher,<sup>6</sup> Rebecca S French,<sup>7</sup>  
8  
9 Chris Bonell,<sup>7</sup> Julia Bailey,<sup>7</sup> Liam O'Hare<sup>8</sup>

10  
11  
12  
13  
14 1. School of Nursing and Midwifery, Queen's University Belfast, Belfast, UK

15  
16  
17 2. Centre for Public Health, Queen's University Belfast, Belfast, UK

18  
19  
20 3. Northern Ireland Clinical Trials Unit, Belfast, UK

21  
22  
23 4. Research Department of Primary Care and Population Health, University College London, London,  
24  
25 UK

26  
27  
28 5. MRC/CSO Social & Public Health Sciences Unit, University of Glasgow, Glasgow, UK

29  
30  
31 6. The Centre for the Development and Evaluation of Complex Interventions for Public Health  
32  
33 Improvement (DECIPHer), Cardiff University, Cardiff, UK

34  
35  
36 7. Department of Social and Environmental Health Research, London School of Hygiene and Tropical  
37  
38 Medicine, London, UK

39  
40  
41 8. Centre for Evidence and Social Innovation, Queen's University Belfast, Belfast, UK

42  
43 **Corresponding Author:** Prof Maria Lohan, School of Nursing and Midwifery, Queen's University  
44  
45 Belfast, 97 Lisburn Road, Belfast, BT9 7BL, UK Email: [m.lohan@qub.ac.uk](mailto:m.lohan@qub.ac.uk) Telephone: +44(0) 289  
46  
47 90972839

48  
49  
50 **Word count:** 6471, including funding statement and acknowledgments & excluding title page,  
51  
52 abstract, references, figures and tables

## ABSTRACT

**Introduction** Teenage pregnancy remains a worldwide health concern which is an outcome of, and contributor to, health inequalities. The need for gender-sensitive interventions with a focus on males in addressing teenage pregnancy has been highlighted as a global health need by the World Health Organisation and identified in systematic reviews of relationship and sexuality education (RSE). This study aims to test the effectiveness of an interactive film-based RSE intervention which draws explicit attention to the role of males in preventing an unintended pregnancy by reducing unprotected heterosexual teenage sex among males and females under age 16 years.

**Methods and analysis** A Phase III cluster randomised trial with embedded process and economic evaluations. *If I Were Jack* encompasses a culturally sensitive interactive film, classroom materials, a teacher-trainer session and parent animations, and will be delivered to replace some of the usual RSE for the target age group in schools in the intervention group. Schools in the control group will not receive the intervention and will continue with usual RSE. Participants will not be blinded to allocation. Schools are the unit of randomisation stratified per country and socio-economic status. We aim to recruit 66 UK schools (24 in Northern Ireland; 14 in each of England, Scotland and Wales), including approximately 7900 pupils. A questionnaire will be administered at baseline and at 12-14 months post-intervention. The primary outcome is reported unprotected sex, a surrogate measure associated with unintended teenage pregnancy. Secondary outcomes include knowledge, attitudes, skills and intentions relating to avoiding teenage pregnancy in addition to frequency of engagement in sexual intercourse, contraception use, and diagnosis of sexually transmitted infections.

**Ethics and dissemination** Ethical approval was obtained from Queen's University Belfast. Results will be published in peer-reviewed journals and disseminated to stakeholders. Funding is from the National Institute for Health Research.

**Trial registration** ISRCTN: 99459996; Pre-results

**STRENGTHS AND LIMITATIONS OF THIS STUDY**

- The study is evaluating the first relationship and sexuality education (RSE) intervention to be developed and trialled which explicitly promotes a gender-sensitive approach to addressing teenage pregnancy by focussing on male perspectives.
- The intervention is culturally sensitive to different parts of the UK, non-directive in terms of pregnancy resolution options and sufficiently flexible to allow use within schools which vary in their personal development/RSE policy, including in faith-based schools.
- It is the first RSE Intervention to be developed and trialled across all four nations of the UK, allowing for exploration of what works best where.
- Due to the nature of the intervention and setting – within schools – participating teachers, pupils and parents cannot be blinded to allocation.
- A biological measure of adolescent conception rates was not possible and hence we rely on a surrogate measure of incidence of unprotected sex.

## INTRODUCTION

Teenage pregnancy remains a worldwide health concern and is both an outcome of, and contributor to, inequalities in health.[1] The UK has the highest rate of teenage pregnancy in Western Europe.[2] While conception rates for girls aged under 18 have halved since 1998 in England and Wales, and now stand at 21.0 per 1000 population,[3] it remains that just over 20,000 teenage women under 18 became pregnant in England and Wales in 2015 and approximately half of these ended in legal abortion.[3] The conception rate for Scotland was 32.4 per 1000 in 2015.[4] In Northern Ireland (NI), abortion is illegal and is only considered lawful in exceptional circumstances where the life of the pregnant woman is at immediate risk or if there is a risk of serious injury to her physical or mental health. Reflecting this different legal framework, government targets around reducing teenage pregnancies in NI relate to births and not conceptions. In NI, the birth rate for teenage mothers per 1000 young women aged 13-19 years was 11.3 in 2013.[5] In the same year, the teenage birth rate in the most deprived areas was 23.0 per 1000, nearly six times that of the least deprived areas in NI (3.9 per 1000).[6]

Although the life course for teenage parents is not universally negative,[7] the social disadvantage and exclusion that are linked to teenage pregnancy are considered problematic.[1] Unintended teenage pregnancy can lead to considerable adverse health problems for teenagers and their infants as well as generating emotional, social and economic costs for them, their families and society.[8, 9] While unintended teenage pregnancy is a complex phenomenon that cannot be prevented through Relationship and Sexuality Education (RSE) alone,[10–16] high quality RSE is an essential component in the process of reducing unintended pregnancy rates, as well as being a vital aspect of improving holistic sexual health and wellbeing.[17–21] The UK governments all emphasise the policy importance of decreasing under-18 conception rates and increasing sexual health precaution behaviours in teenagers via the implementation of RSE in schools as a key objective in their current sexual health policies.[22–24]

1  
2  
3 Several systematic reviews have identified the characteristics of effective RSE programmes which  
4 help increase their impact on sexual risk-taking behaviours.[27–33] These include: the use of  
5 theoretically-based interventions targeting sexual and psycho-social mediating variables such as  
6 knowledge, attitudes, self-efficacy, intentions, perceptions of risk, and perceptions of peer norms  
7 which are linked to sexual behaviour change; the use of culturally-sensitive and gender-specific  
8 interventions; the use of interactive modalities which promote personal identification with the  
9 educational issues and engagement of young people; the use of skills-building components; the  
10 involvement of parents in the RSE process; and facilitating linkages with support services. However,  
11 teenage boys have usually been neglected in relation to RSE, particularly with respect to teenage  
12 pregnancy.[18, 34–38] The lack of gender-sensitive interventions which acknowledge the potential  
13 influence of gender in successfully engaging both males and females in addressing teenage  
14 pregnancy has been highlighted as a global health need by the World Health Organisation (WHO)[39-  
15 41] and identified in systematic reviews of RSE.[15, 37, 42-43]

16  
17  
18  
19  
20  
21  
22  
23  
24  
25  
26  
27  
28  
29  
30  
31 The *If I were Jack* teacher-led classroom-based RSE intervention represents an innovative  
32 combination of the effective characteristics identified in the above mentioned systematic reviews. It  
33 is aimed at both teenage boys and girls but with explicit attention drawn to the role of teenage boys  
34 in preventing an unintended teenage pregnancy. A specific aim of *If I Were Jack* is to encourage  
35 scrutiny of the gender norms which typically situate the issue of a teenage pregnancy as a woman's  
36 problem, by placing emphasis on the teenage male perspective whilst not excluding the teenage  
37 female perspective. The *If I Were Jack* intervention is predicted to decrease young people's sexual  
38 risk-taking behaviour in relation to avoiding teenage pregnancy and to promote positive sexual  
39 health.  
40  
41  
42  
43  
44  
45  
46  
47  
48  
49

50 We aim to evaluate the effectiveness and cost effectiveness of the *If I Were Jack* RSE intervention in  
51 reducing rates of unprotected sex among teenagers under 16 years of age and to better understand  
52 the contextual conditions through a process evaluation. The intervention will be delivered to replace  
53  
54  
55  
56  
57  
58  
59  
60

1  
2  
3 some of usual RSE in the intervention group. Schools in the control group will not receive the  
4  
5 intervention and will continue to deliver RSE according to their current and existing practices,  
6  
7 including meeting their statutory curriculum requirements. This is a pragmatic comparator reflecting  
8  
9 typical routine practice, which allows for comparison of the intervention with the existing RSE  
10  
11 experience.  
12

## 13 14 15 16 **METHODS AND ANALYSIS**

### 17 18 19 **Trial design**

20  
21  
22 The JACK trial is a Phase III multi-centre, parallel-group cluster randomised trial (cRCT) (Figure 1).  
23  
24 Schools are the unit of randomisation with a 1:1 allocation. The study design has an embedded  
25  
26 process evaluation and economic evaluation. The trial design follows the Medical Research Council's  
27  
28 Framework for Developing and Evaluating Complex Interventions.[44]  
29

### 30 31 **Study setting**

32  
33  
34 The trial will take place in 66 secondary level schools in the UK (24 in Northern Ireland and 14 each in  
35  
36 England, Scotland and Wales). The whole of NI is included but, for reasons of practicality,  
37  
38 convenience and cost, representative geographical restrictions will be in place in England (Greater  
39  
40 London area), Scotland (mainland Scotland) and Wales (South Wales). The intervention will be  
41  
42 delivered by teachers, as part of the Key Stage 4 Personal and Health Education curriculum (NI,  
43  
44 England and Wales) and in Scotland as part of the Curriculum for Excellence Relationships, Sexual  
45  
46 Health and Parenthood education.  
47

### 48 49 **Eligibility**

50  
51  
52 Eligibility criteria for clusters  
53  
54  
55  
56  
57  
58  
59  
60



1  
2  
3 All state secondary-level schools in the 2018/2019 academic year will be included with the exception  
4 of independent private, special and Irish/Welsh-medium and Scottish Gaelic schools (but not  
5 excluding schools that have an embedded Irish/Welsh-medium component). Schools with less than  
6  
7 30 pupils in the target year group (Year 11 in NI, S3 in Scotland and Year 10 in England and Wales)  
8  
9 will be excluded. Schools that have already participated in the feasibility ( $n=8$  in NI), [45]  
10  
11 transferability (England  $n=3$ , Scotland  $n=3$  and Wales  $n=3$ ) and pilot studies (England  $n=1$ , Scotland  
12  
13  $n=1$  and Wales  $n=1$ ) involving the *If I Were Jack* intervention in preparation of this for phase III study  
14  
15 will also be excluded.  
16  
17  
18

#### 19 20 Eligibility criteria for participants

21  
22  
23 Eligible teachers are those who will be responsible for the delivery of RSE to pupils in Year 11 in NI,  
24  
25 S3 in Scotland and Year 10 in England and Wales during the 2018/2019 academic year.  
26

27  
28 Eligible pupils are the 2018/2019 academic year pupil cohort (all classes within) in Year 11 in NI, S3 in  
29  
30 Scotland and Year 10 in England and Wales (mean age 14). This year group has been selected for a  
31  
32 number of reasons. First, proximal risk factors of teenage pregnancy begin manifesting in this age  
33  
34 group,[14, 46] making it an appropriate time for preventative sex education that is considered  
35  
36 acceptable in society and education.[14, 29, 47] Second, there is an identified deficit in resources for  
37  
38 this age group in relation to teenage pregnancy,[48-49] and third, findings from the JACK feasibility  
39  
40 study[45] indicated that there is a greater opportunity for implementation of the intervention during  
41  
42 a year where there are no statutory examinations. Finally, this population has been chosen to  
43  
44 facilitate a 12-14 month follow-up of pupils (post-intervention) before some pupils exit formal  
45  
46 education following their first major statutory exams or reaching the age of 16 years.  
47  
48

#### 49 **Sample size**

50  
51  
52 The sample size calculation is based on UK-wide data[25-26] demonstrating that between 25% and  
53  
54 33% of 15 year olds are having sex and the proportion of 15 year olds reporting unprotected sex is  
55  
56  
57  
58  
59

1  
2  
3 2.8% (overall in NI, England, Scotland and Wales). The study will be powered to detect a 50%  
4  
5 reduction in the incidence of unprotected sex (from expected rate of 2.8% to 1.4%) by 15 years of  
6  
7 age. Such a difference of 1.4% in unprotected sex has been shown to have a meaningful impact on  
8  
9 pregnancy rates.[14, 50-52] The between-group difference in the incidence of unprotected sex of  
10  
11 1.3% (95% CI 0.5 to 2.2%) by nine months in our feasibility trial[45] demonstrates that such an effect  
12  
13 size is plausible and is consistent with effect sizes seen in the literature.[50] The study will take  
14  
15 account of clustering. In the feasibility data, the intraclass correlation coefficient (ICC) was 0.01.[45]  
16  
17 As pilot studies can provide imprecise estimates of ICCs,[53] we re-estimated using ICCs from three  
18  
19 sources, the RIPPLE cRCT,[52] a 2013/2014 WHO Health Behaviour in School-aged Children survey  
20  
21 [25] and a 2013 Young Persons' Behaviour and Attitudes Survey in NI conducted by the Northern  
22  
23 Ireland Statistics & Research Agency (NISRA).[26] The data from the WHO and NISRA studies were  
24  
25 combined. The RIPPLE and combined WHO and NISRA studies found an ICC of 0.004. Assuming 120  
26  
27 students per school, an ICC of 0.01 and 7% attrition (plus two additional schools to be conservative),  
28  
29 a trial involving 33 schools per group will provide 80% power at a 5% significance level (a pupil  
30  
31 participant sample size of n=7904, with n=224 reporting unprotected sex). The power would rise to  
32  
33 93% if the ICC is 0.004.  
34  
35

### 36 37 **Recruitment and retention**

#### 38 39 Recruitment of schools

40  
41  
42 In each country, eligible schools will be stratified based on the percentage of students eligible for  
43  
44 free school meals (%FSM) for the 2018/2019 academic year (schools above and below the median  
45  
46 national percentage free school meals) as a proxy for the level of deprivation. In NI, 14 schools will  
47  
48 be randomly selected from the above-median stratum and 10 from the below-median stratum (total  
49  
50 24). In England, Scotland and Wales, eight schools will be randomly selected from the above-median  
51  
52 stratum and six from the below-median stratum (to give a total of 14). The decision to select slightly  
53  
54  
55  
56  
57  
58  
59  
60

1  
2  
3 more schools from the above-median %FSM reflects research which indicates that teenage  
4 pregnancy and unprotected sex is more acute in more deprived areas.[1, 25]  
5  
6

7 The school recruitment period will run from February to June 2018. The school recruitment strategy  
8 is represented in Figure 2. In Scotland, it is required that permission is given from each local  
9 authority (typically by approaching the Director of Education) prior to commencing recruitment. Any  
10 schools that decline to participate will be replaced by a randomly selected school in the same  
11 stratum.  
12  
13  
14  
15  
16

#### 17 Recruitment of teachers

18  
19 Once a school has made a decision to participate, a member of the research team will meet with  
20 teachers (identified by a school-assigned 'Trial Champion') responsible for the delivery of RSE to the  
21 target pupil year groups during the 2018/2019 academic year, to deliver an information session and  
22 answer any outstanding enquiries. Teachers will be provided with a copy of the school letter,  
23 information sheet, memorandum of understanding and consent form.  
24  
25  
26  
27  
28  
29  
30  
31

#### 32 Recruitment of pupils

33  
34 When a school and the relevant teachers who will be delivering the intervention to pupils have  
35 provided consent, the first step taken towards pupil recruitment is to inform parents/guardians.  
36 Schools (with the assistance of the school administrator) will be asked to post a hard copy of the  
37 parents'/guardians' information sheet and an opt-out consent form with pre-paid response  
38 envelopes. Schools will be responsible for addressing and preparing envelopes for postage.  
39 Parents/guardians will be advised within the material provided that they have to return the opt-out  
40 consent forms by a date no later than three weeks prior to commencement of baseline data  
41 collection within the school. The trial co-ordinator will collate a list of parents/guardians who have  
42 opted their child out of participation and return this to participating teachers.  
43  
44  
45  
46  
47  
48  
49  
50  
51  
52  
53  
54  
55  
56  
57  
58  
59  
60

1  
2  
3 Schools will be provided with printed copies of the pupil information sheets to be distributed to  
4 eligible pupils at least one week prior to baseline data collection. Only eligible pupils whose  
5 parents/guardians did not opt-out of providing consent for them to participate will be provided with  
6 a copy of the pupil information sheet. Immediately prior to administering the baseline  
7 questionnaire, eligible pupils will attend a short information session, delivered by a member of the  
8 research team, including an information video. Pupils will be given an opportunity to ask questions  
9 prior to deciding whether to participate. A repeat information session and baseline data collection  
10 session will be facilitated in agreement with the school to accommodate any pupils who are absent  
11 from the initial session. In the unlikely event that absenteeism remains in excess of 5-10% in a  
12 school, the research team, in agreement with the school, will return a third time to facilitate an  
13 additional information session and baseline data collection. Pupils with mild learning difficulties or  
14 poor English will be supported where possible by fieldworkers to complete the questionnaires.

#### Retention

25  
26 To promote school, teacher and pupil retention and complete follow-up, schools will be provided  
27 with £1000 upon completion of baseline and follow up measures. Trial co-ordinators will be  
28 proactive in resolving any issues that arise with schools. Periodic communications will be provided  
29 by trial co-ordinators to inform schools, staff, pupils and parents (depending on preferences of  
30 schools) of the current status of the study, and plans for the next phase, as well as to acknowledge  
31 their support.

#### Randomisation

32  
33 Following baseline data collection, randomisation will be carried out by the NI Clinical Trials Unit  
34 (NICTU, a UK Clinical Research Collaboration registered CTU), who will produce eight randomisation  
35 schedules (using unique identifiers for schools), one for each %FSM stratum within each country,  
36 using random permuted blocks of mixed size, generated using nQuery Advisor 7.0. The NICTU are  
37 not involved with recruitment and will only release the randomisation code (in sealed envelopes)

when all schools have been recruited and baseline data collection completed, therefore allocation concealment will be ensured.

### Intervention

The intervention will be described in accordance with the Template for Intervention Description and Replication (TIDieR) guidelines.[87]

*Name and brief description:* *If I Were Jack* is an evidenced-based RSE teacher-delivered intervention designed to prevent unintended pregnancy and promote positive sexual health by increasing teenagers' intentions to avoid teenage pregnancy through delaying sexual intercourse or using contraception consistently. It is especially designed to engage with males but can be delivered to both male and female pupils. The underpinning theoretical framework for this intervention combines the well-established Theory of Planned Behaviour [57] and critiques to this theory[58] which focus on the inclusion of an understanding of the broader socio-environmental factors (such as socio-economic status; SES) and underlying values (such as religiosity and gender ideologies) associated with the occurrence of teenage pregnancy.[14, 59] The *If I Were Jack* Theory of Change Logic Model is depicted in Figure 3.

*Why, rationale of essential elements:* *If I Were Jack* targets six psycho-social mechanisms which research indicates are related to a reduction in risk-taking behaviour: knowledge, communication skills, attitudes, social influences, beliefs about capabilities, and intentions (Table 1).[15, 60, 61]

**Table 1:** Psychosocial and behavioural components of the *If I Were Jack* intervention

| Component | Aim                                                                                                                                                                                                                                                                                                                                           |
|-----------|-----------------------------------------------------------------------------------------------------------------------------------------------------------------------------------------------------------------------------------------------------------------------------------------------------------------------------------------------|
| Knowledge | Increase knowledge of: ways of avoiding unintended pregnancy; roles and responsibilities of young men in relation to unintended pregnancy; possible negative relational, social, emotional and financial consequences of unintended pregnancy; and sources of information and support for unintended pregnancy and sexual health more broadly |

|                                                                                 |                            |                                                                                                                                                                                                                                                                                                                                                                                                                                                                                                                           |
|---------------------------------------------------------------------------------|----------------------------|---------------------------------------------------------------------------------------------------------------------------------------------------------------------------------------------------------------------------------------------------------------------------------------------------------------------------------------------------------------------------------------------------------------------------------------------------------------------------------------------------------------------------|
| 1<br>2<br>3<br>4<br>5                                                           | Communication skills       | Increase skills in communicating with parents, peers and sexual partners about avoiding unintended pregnancy                                                                                                                                                                                                                                                                                                                                                                                                              |
| 6<br>7<br>8                                                                     | Attitudes                  | Increase anticipated regret about the consequences of unintended pregnancy on current and future goals                                                                                                                                                                                                                                                                                                                                                                                                                    |
| 9<br>10<br>11<br>12<br>13<br>14<br>15<br>16<br>17<br>18<br>19<br>20<br>21<br>22 | Social influences          | Increase awareness of peer norms, stereotypical gender norms and parental attitudes and beliefs about teenage pregnancy<br>Gender norms: increase perception that both men and women have roles and responsibilities in avoiding and dealing with the consequences of unintended pregnancy<br>Peer norms: increase perception that most peers are not sexually active and use contraception when they are<br>Parental values and beliefs: increase awareness of parental attitudes and beliefs about unintended pregnancy |
| 23<br>24<br>25<br>26<br>27<br>28                                                | Beliefs about capabilities | Increase perceived behavioural control to avoid unintended pregnancy (say no to sex or obtain and use contraception correctly) and increase self-efficacy to communicate about avoiding unintended pregnancy with parents, peers and professionals                                                                                                                                                                                                                                                                        |
| 29<br>30<br>31                                                                  | Intentions                 | Increase strength of intention to avoid unplanned teenage pregnancy                                                                                                                                                                                                                                                                                                                                                                                                                                                       |

32  
33  
34 The intervention components provide pupils with educational information and opportunities for  
35 discussion, skills practice, reflection and anticipatory thinking and are designed to specifically target  
36 one or more of the above psycho-social mechanisms.[62] The intervention components also include  
37 explicit reference to the impact of SES, religion and gender norms on sexual behaviour, inviting  
38 participants to think through how underlying social influences, such as social class and gender norms  
39 of sexual behaviour, can be challenged through individual agency. A feasibility trial demonstrated  
40 the acceptability to teachers and pupils and feasibility of implementation across a wide range of  
41 schools in Northern Ireland.[45]

42  
43  
44  
45  
46  
47  
48  
49  
50  
51  
52 *What, a description of the materials:* The *If I Were Jack* intervention consists of the following  
53 elements:  
54  
55  
56  
57  
58  
59  
60

- A culturally sensitive interactive video drama (IVD) intended to immerse teenagers in a story of a week in the life of Jack, a teenager who has just been told by his girlfriend that she is pregnant. By asking males and females to imagine they were Jack and how they would think and feel if they were in his situation, it is designed to expose and challenge the gender assumptions around roles and responsibilities for teenage pregnancy by opening them up for reflection and negotiation. Informed by the findings of a prior transferability study that followed the feasibility trial of the intervention,[45] two versions of the IVD have been made available: one for use in England and Wales, using actors with English accents and one for use in NI and Scotland, using actors with NI accents. The IVD is designed to be delivered on individual computers/tablets with the use of headphones.
- Classroom materials for teachers containing detailed lesson plans with specific classroom-based and homework activities designed to build pupils' skills to a) obtain relevant sexual health information and b) develop communication skills with peers and trusted adults.
- A standardised 60-minute training session for RSE teachers implementing the intervention. The training session will adhere to a pre-defined teacher-trainer protocol and will be delivered in schools by country-specific established statutory and non-statutory RSE coordinators who normally provide RSE teacher training in schools.
- Two short animated films to engage parents/guardians and help/encourage them to have a conversation with their teenager about avoiding unintended pregnancy. A link to the web-hosted films will be texted and/or emailed via a school administrator to all parents/guardians of participating pupils in intervention schools (with one additional reminder text/email).
- A dedicated website ([www.qub.ac.uk/IfIWereJack](http://www.qub.ac.uk/IfIWereJack)) for the intervention, will act as a portal of dissemination, providing password protected access to the intervention materials that teacher-trainers, teachers, parents, and pupils can access.

*Who delivers the intervention?* It is designed to be delivered by trained RSE teachers.

1  
2  
3 *How, modes of delivery: If I Were Jack* can be delivered either over four 50-60 minute lessons or over  
4  
5 six 35-45 minute lessons and consists of a combination of classroom-based activities (mainly group  
6  
7 discussion) having first viewed the IVD, in addition to pupils being asked to engage in two homework  
8  
9 activities (one of which involves discussion with parents/guardians). Adherence to the intervention  
10  
11 protocol will be determined as part of our process evaluation.  
12

13  
14 *Where, locations where intervention has occurred:* The intervention has been delivered in NI[45] and  
15  
16 Ireland, using a further locally produced IVD for Ireland. A version of the intervention, the IVD only,  
17  
18 has been delivered in schools in South Australia.  
19

## 20 21 **Outcomes**

### 22 23 Primary outcome

24  
25  
26 In this trial, a reduction in unintended teenage pregnancy rates would be the ideal primary outcome  
27  
28 measure, but the sample size would need to be very large to detect change in unintended pregnancy  
29  
30 rates. We will therefore use a surrogate measure associated with unintended teenage pregnancy:  
31  
32 unprotected sex at last sexual encounter, as defined by sexual intercourse without use of  
33  
34 contraception (barrier or hormonal). Unprotected sex during teenage years is well established as the  
35  
36 main proximate behavioural determinant of teenage pregnancy and is a commonly measured  
37  
38 behavioural outcome in studies examining the impact of RSE interventions on teenage  
39  
40 pregnancy.[10, 12, 14, 50, 63, 64] Studies indicate that, although other behavioural determinants  
41  
42 (such as frequency of sexual intercourse and number of sexual partners) are important, avoidance of  
43  
44 unprotected sex via consistent use of contraception is central in explaining variation in levels of  
45  
46 teenage pregnancy.[18, 51] The primary outcome will be based on contraception use at last sexual  
47  
48 intercourse of unprotected sex at follow-up (i.e. answers to the question “Did you use any form of  
49  
50 contraception the last time you had sex?”), consistent with the data on which the sample size  
51  
52 calculation was based.[25] An additional item will also be included related to lifetime incidence of  
53  
54 unprotected sex in order to account for sporadic use of contraception that may not be reflected in  
55  
56  
57  
58  
59  
60



1  
2  
3 the last sexual encounter. Participants reporting the use of natural family planning or withdrawal  
4 methods will be categorised as having engaged in unprotected sex due to the reduced efficacy of  
5 these methods in preventing pregnancy and transmission of sexually transmitted infections (STIs).  
6  
7 This study will not undertake any data linkage with Health and Social Care or National Health Service  
8 records, given that data on conception rates are not available in NI and that data for sexual health  
9 related services in England are not readily available as part of routinely collected data given patient  
10 privacy requirements.  
11  
12  
13  
14  
15  
16  
17

### 18 Secondary outcomes

19  
20  
21 Secondary outcomes are 12-month impacts on knowledge, attitudes, skills and intentions to  
22 avoiding teenage pregnancy. Secondary outcomes informed by our theory of change (see Figure 3)  
23 include knowledge, attitudes, communication skills and intentions relating to avoiding teenage  
24 pregnancy at follow-up and are hypothesized to lead to increased intention to avoid unprotected  
25 sex. Data will be collected using a number of standardized measures, including the male role  
26 attitudes scale,[69] sexual socialisation instrument,[70] sexual self-efficacy scale.[71] comfort  
27 communicating about pregnancy and comfort communicating about contraception derived from  
28 mathtech behaviour inventory.[68] We will also collect data using an 'Intentions to avoid a teenage  
29 pregnancy scale', developed and psychometrically tested in our feasibility trial.[45] The measures  
30 were selected because the constructs they measure map closely to the theoretical framework  
31 underpinning the intervention and the reliability and completion rates of the measures were  
32 satisfactory in the feasibility trial.[45] In addition, to assist with the economic evaluation,  
33 supplementary secondary outcomes include: frequency of engagement in sexual intercourse,  
34 contraception use, diagnosis of STIs and incidence of pregnancy and pregnancy outcomes. The  
35 collection of this data was also shown to be feasible in the feasibility trial. Finally, we will collect  
36 important individual level demographic and socio-economic characteristics of the sample to deepen  
37 understandings of how these factors moderate effectiveness.  
38  
39  
40  
41  
42  
43  
44  
45  
46  
47  
48  
49  
50  
51  
52  
53  
54  
55  
56  
57  
58  
59  
60

### **Data collection**

Participating pupils will be in the study for approximately 18 months and asked to complete a paper-based questionnaire during one RSE lesson at baseline and again between 12 and 14 months later. A fieldworker will administer questionnaires to pupils, under exam conditions, two weeks prior to commencement of intervention delivery. Informed by the process evaluation conducted in the feasibility study,[45] teachers will be asked to stay at the front of the classroom to maintain order while alleviating any concerns that teachers may be able to see pupils' answers. Additional fieldworkers will be available to provide support to pupils who require extra help and to ensure questionnaires are completed confidentially.

### *Primary outcome*

### **Process evaluation**

Informed by realist approaches to the evaluation of interventions,[44, 72, 73] the process evaluation has four aims. First, we will examine reasons for school participation and non-participation to inform risk of bias in the trial as well as longer term sustainability of implementation of the intervention. Second, we will examine intervention delivery and fidelity in the context of overall RSE provision in intervention schools. Third, we will assess provision in control schools and potential contamination caused by any changes to provision that could be due to participation in the trial. Fourth, we will explore self-reported perceptions of effectiveness and moderating influences in intervention schools among a sample of pupils, teachers and school principals and parents. Triangulated data collection methods will include semi-structured interviews with teachers, focus group discussions with pupils, observations of a sample of lessons and a survey of parents/guardians with follow-up focus groups. For detail on our approach to integration of the process evaluation with the experimental design methodology to achieve research objectives, see Figure 4.

All schools

1  
2  
3 The school-assigned trial champion or a suitable person identified by the trial champion will  
4 complete a school background questionnaire, designed to detail more general information pertinent  
5 to trial implementation i.e. school experience of teenage pregnancy, school holidays/closures,  
6 school experience of pupils/parents or guardians who do not speak English as a first language or who  
7 do not understand English at all, and school involvement in other research. An appropriate member  
8 of staff identified by the school-assigned trial champion will also complete a questionnaire about  
9 current RSE provision in the school to gain a better understanding of the nature, quantity and quality  
10 of RSE currently taught within the school as well as the facilitators and barriers to current RSE  
11 provision within the school. A school administrator will be asked to fill out a school administrator  
12 resource use record detailing associated costs (i.e. postage of parent/guardian information) and time  
13 spent. Schools will be reimbursed up to the value of £100 for these costs.  
14  
15  
16  
17  
18  
19  
20  
21  
22  
23  
24  
25

#### 26 Intervention schools

27  
28  
29 Parent/guardian online survey: Parents/guardians will have been made aware when they were in  
30 receipt of the parents'/guardians' information sheet that there would be an opportunity for them to  
31 respond to a short online parent/guardian survey. Eligible parents/guardians (who have not opted  
32 out of providing consent for their child to participate) will receive the link to this survey (hosted  
33 using the SurveyMonkey® UK platform) in an email and/or text message issued by the school  
34 administrator inviting them to participate (post intervention delivery). The survey will ask  
35 parents/guardians about their engagement with and opinion of the parent/guardian animations and  
36 homework session and whether their child has discussed with them their experience of engaging  
37 with *If I Were Jack*. The questionnaire will be translated where possible and where necessary.  
38  
39  
40  
41  
42  
43  
44  
45  
46  
47  
48

49 Teacher implementation log: Teachers responsible for delivering the intervention will be asked to  
50 complete an implementation log to detail what activities were completed or not completed during  
51 each lesson, and perception of pupil engagement with each activity.  
52  
53  
54  
55  
56  
57  
58  
59  
60

1  
2  
3 Telephone interviews: 15-30 minute telephone interviews will be conducted by trial co-ordinators  
4 with school principals or trial champions in intervention schools that are not 'case study schools'  
5 (see below) to determine any barriers or facilitators of engagement with the intervention.  
6  
7

#### 8 9 10 Case study schools

11  
12 Participating intervention schools will be randomly rank ordered in each country and two case study  
13 schools from each country will be randomly selected by NICTU to participate in the process  
14 evaluation. Should a school refuse participation, a further random selection will be made.  
15  
16

17  
18 Observations: Country-specific trial co-ordinators will conduct structured observations of one  
19 randomly selected lesson in every class group in receipt of the intervention in the eight case study  
20 schools. Observations will be focused primarily on measuring teacher fidelity to implementation  
21 protocol and pupil engagement.  
22  
23  
24  
25  
26

27  
28 Focus groups: Trial co-ordinators will conduct three 60-minute focus group discussions in each of the  
29 eight case study schools. One group will be composed of all teachers who delivered the intervention.  
30 The second group will include a maximum of six English-speaking pupils who received the  
31 intervention. Teachers who delivered the intervention will ask for a mixture of male and female  
32 pupil volunteers and pass details of those pupils to the trial co-ordinator. In the event that more  
33 pupils volunteer than are needed (per school), a random selection will be made. The third group will  
34 be a maximum of six English-speaking parents/guardians (of children who received the intervention).  
35 Discussions will focus on perceived barriers and facilitators of successful implementation and  
36 engagement with different components of the intervention.  
37  
38  
39  
40  
41  
42  
43  
44  
45  
46

#### 47 48 Fieldworkers

49  
50 Fieldworkers will complete a fieldworker perception form after each visit to a school, asking them to  
51 detail what worked well and what did not in relation to data collection and any other relevant  
52 observations they may have.  
53  
54  
55  
56  
57

1  
2  
3 Education/policy specialists  
4

5 Trial co-ordinators will conduct telephone or face-to-face interviews with one or two  
6 education/policy specialists in each country. Interviews will focus on the current context of RSE  
7 policy and perceptions of how this might influence the uptake of the *If I Were Jack* intervention.  
8  
9

### 10 11 12 **Economic evaluation** 13

14  
15 The economic evaluation will aim to describe the costs and consequences of implementing *If I Were*  
16 *Jack* in UK schools so as to provide information to decision makers on the implications of potential  
17 further roll-out of the intervention. This will include the duration of time taken up by *If I Were Jack* in  
18 school from the perspective of the teacher and impact on time spent on other important curricula  
19 activities compared to time spent on standard RSE. The aim of this will be to provide a measure of  
20 the opportunity cost to schools of implementing *If I Were Jack* compared to current RSE. The  
21 structure of the evaluation will follow NICE guidance for evaluating public health interventions[74]  
22 and recent guidance published by Edwards et al[75] on economic evaluations in public health. Costs  
23 will include the cost of implementing the intervention in schools including any training involved and  
24 the cost of current RSE in the control schools. We will also collect information on healthcare cost  
25 information in the intervention and control arms including the costs of sexual health related primary  
26 care attendances, costs associated with STIs and unintended pregnancies (although numbers of  
27 these are likely to be small). The cost of adapting *If I Were Jack* to different groups will also be  
28 reported given that others may want to adapt the intervention before rolling it out. Mean cost per  
29 pupil will be reported alongside consequences including use of contraception, STIs and unintended  
30 pregnancies collected using questionnaires administered to pupils at baseline and follow-up.  
31 Although 12-14 month recall time is a relatively long time-period, pupils are likely to be able to recall  
32 high impact events that occurred during this period. The follow-up time is also important to fit  
33 within the school year timetable. Costs will also be reported by country, given the different sexual  
34 health services provided and hence differential implications for health service costs by country.  
35  
36  
37  
38  
39  
40  
41  
42  
43  
44  
45  
46  
47  
48  
49  
50  
51  
52  
53  
54  
55  
56  
57  
58  
59  
60

1  
2  
3 Given that STIs and unintended pregnancies are likely to be rare but potentially high impact events  
4  
5 in this population group, the long-term costs and consequences will be modelled as part of the cost-  
6  
7 effectiveness decision model (Figure 5), incorporating theories of behaviour change and identified as  
8  
9 applicable for use in this trial during the feasibility trial.[45] In addition to collecting information as  
10  
11 part of the trial, we will look to systematic reviews of evidence of the impact of digital interventions  
12  
13 on sexual health behaviour in this population group, for example the review recently undertaken  
14  
15 and published by Bailey et al.[76] We will undertake one way, two way and probabilistic sensitivity  
16  
17 analyses of the results. Cost effectiveness acceptability curves and cost-effectiveness planes will be  
18  
19 reported. The model will have a 20-year time horizon and discounting of future costs and benefits  
20  
21 will comply with NICE guidance for evaluating public health interventions.[74]

### 22 23 24 **Statistical Methods**

25  
26  
27 The reporting and presentation of findings will be in accordance with the CONSORT guidelines for  
28  
29 cRCTs.[77] All analyses will take account of clustering by school using robust standard errors, and  
30  
31 intervention and control groups will be compared at baseline via frequencies/descriptive statistics  
32  
33 (percentage, mean or median as appropriate) in relation to sex, ethnicity, SES at school level (using  
34  
35 percentage free school meals and post-code data) and at individual level (using highest education  
36  
37 qualifications of parents), primary and secondary outcomes.

38  
39  
40 Primary analysis (12-14 month follow-up): The primary effectiveness analysis will be on an intention  
41  
42 to treat basis, using a multi-level logistic regression model (two levels: pupils nested within schools)  
43  
44 adjusting for the baseline outcome and stratification variables.[78] Sensitivity analyses, making  
45  
46 different assumptions on the best and worst case scenarios, as well as imputation models of  
47  
48 missingness will be conducted to investigate the potential impact of missing data.

49  
50  
51 Secondary analysis (12-14 month follow-up): Although the trial is not powered to detect the  
52  
53 influence of mediating and moderating variables, we will examine the following outcomes informed  
54  
55 by our theory of change model (see Figure 3): i) interaction terms will be used to investigate possible  
56  
57

1  
2  
3 differences in the effect of the intervention on the primary outcome by whether pupils at baseline  
4 reported having had unprotected sex or not, country (Wales, England, Scotland, NI), sex, socio-  
5 economic group (see earlier section 5.5) and ethnicity); ii) a mediational analysis, using an analytic  
6 framework recommended for RCTs,[79] will be used to explore whether the effect of the  
7 intervention on the primary outcome is mediated by individual-level sexual health knowledge and  
8 sexual competence, perceived behavioural control, intentions to avoid an unintended pregnancy,  
9 communication with parents, and gender ideologies. In these secondary analyses, p-values will be  
10 interpreted with caution due to the low power and number of interactions being tested (e.g. use of  
11 Bonferroni corrected p-values).

#### 22 Process evaluation

23  
24 All data will be transcribed verbatim (in the case of interviews) or written up in detail (in the case of  
25 observational field notes and other secondary source data). These data will be organised using  
26 'NVivo' software and analysed systematically and thematically based on the six steps proposed by  
27 Braun and Clarke[80] to enable identification and analysis of patterns (or 'themes') within the data  
28 by moving iteratively between theoretical understandings and the new data. These inductively and  
29 deductively derived codes will be analysed to form overarching themes emerging from each of the  
30 participant groups outlined above. We will use qualitative software 'NVivo 10' to organise the data,  
31 and we will ensure methodological rigour by establishing credibility, transferability, dependability  
32 and confirmability using techniques suggested by Lincoln and Guba.[81] In addition, following Hyde  
33 et al,[82] specific attention will be given to analysing the group dynamics of the focus groups as part  
34 of the overall interpretive process.

#### 49 DISCUSSION

50  
51 The strengths of this study include that this is the first RSE intervention to be developed and trialled  
52 which explicitly promotes a gender-sensitive approach to addressing teenage pregnancy by  
53 focussing on male perspectives. The intervention is culturally sensitive to different parts of the UK, is  
54  
55  
56  
57

1  
2  
3 non-directive in terms of pregnancy resolution options and is sufficiently flexible to be taught within  
4 the framework of a school's ethos and personal development/RSE policy, including in faith-based  
5 schools. This has particular significance in NI, with almost half (46%) of all NI grammar and secondary  
6 schools identifying as a Roman-Catholic school.[83] This is also the first RSE intervention to be  
7 developed and trialled across all four nations of the UK, allowing for exploration of what works best  
8 where. An additional strength of the study is that the embedded process evaluation involves  
9 triangulation of sources including school management, teachers, pupils, parents and RSE statutory  
10 and voluntary stakeholders. Study limitations include that the pragmatic setting – within schools –  
11 means that schools and participating teachers, pupils and parents will remain unblinded to the  
12 allocation. Finally, the use of the surrogate measure of unprotected sex rather than a biological  
13 measure (such as conception rates) introduces the possibility that the findings of the trial will be  
14 influenced by self-report bias, but the veracity of this measure is enhanced by privacy,  
15 confidentiality and a control group.  
16  
17  
18  
19  
20  
21  
22  
23  
24  
25  
26  
27  
28  
29

### 30 **ETHICS AND DISSEMINATION**

31  
32  
33 In writing this protocol, we have endeavoured to adhere to the recommendations and guidance  
34 provided in the Consolidated Standards of Reporting Trials (CONSORT) 2010 statement and the  
35 extension for cRCTs,[77, 84] the Standard Protocol Items: Recommendations for Intervention Trials  
36 (SPIRIT) Statement 2013[85, 86] and the Template for Intervention Description and Replication  
37 (TIDieR).[87] When registering the trial, we have provided structured summary information in  
38 accordance with the requirements of the WHO Trial Registration Data Set (Supplementary File  
39 3).[88]  
40  
41  
42  
43  
44  
45  
46  
47

48  
49 Any modifications to the protocol which may impact on the conduct of the study, potential  
50 effectiveness, or impact study participants, including changes of study objectives, study design,  
51 sample size, study procedures or significant administrative aspects will require a formal amendment  
52 to the protocol. Such amendment will be agreed upon by the JACK Trial Steering Committee,  
53  
54  
55  
56  
57  
58  
59



1  
2  
3 reported to the funder (National Institute of Health Research, NIHR) and approved by the ethics  
4  
5 committee prior to implementation. Minor administrative changes, corrections or clarifications that  
6  
7 have no effect on the way the study is to be conducted will be agreed upon by the JACK Trial  
8  
9 Steering Committee, documented and reported to the NIHR. The ethics committee may be notified  
10  
11 of such changes at the discretion of the JACK Trial Steering Committee.  
12

13  
14 A full study report will be submitted to the NIHR by the end of December 2020 and made publically  
15  
16 available thereafter in the Public Health Research journal on the NIHR Journals Library. We shall  
17  
18 make data available to the scientific community with as few restrictions as feasible, following receipt  
19  
20 of a request to the corresponding author, while retaining exclusive use until the publication of major  
21  
22 outputs via academic conference presentations and journal articles in addition to material created  
23  
24 for relevant stakeholders. Pupil friendly brief reports will be provided to all participating schools.  
25

26  
27 Ethical approval for the JACK Trial was granted by the Research Ethics Committee of the School of  
28  
29 Nursing and Midwifery, Queen's University Belfast in July 2017 (Ref: 11.MLohan.05.17.M6.V1).  
30

### 31 32 **Safety and data monitoring**

33  
34  
35 This is a low-risk study, therefore, a Data Monitoring Committee is not required and no interim  
36  
37 analysis is planned.  
38

### 39 40 **ACKNOWLEDGEMENTS**

41  
42 In addition to the authors listed, the JACK Trial study thus far has been dependent on the  
43  
44 commitment provided by extensive public involvement. The intervention has been designed,  
45  
46 developed and piloted in Ireland, NI and South Australia involving over ten years of research with  
47  
48 pupils, teachers, sex education specialists, and education and health promotion departments. These  
49  
50 collaborations have influenced the study by allowing different perspectives to inform the design and  
51  
52 optimal conditions of implementation. We specifically acknowledge the role of the Trial Steering  
53  
54 Committee, comprised of trials experts, a school principal, a school teacher, parent and pupils, who  
55  
56  
57  
58  
59  
60

1  
2  
3 have provided independent expert advice on the intervention itself as well as refining research  
4 methods for delivery in schools. We also wish to acknowledge our Stakeholders Group, composed of  
5 a UK-wide group of RSE specialists and senior representatives from key statutory organisations and  
6 government departments who have helped to refine the intervention and the study design by  
7 ensuring the research outcomes are important to public concerns and the methods proposed are  
8 acceptable and sensitive to all study participants. We would also like to acknowledge the invaluable  
9 involvement of our Young People's Advisory Groups (one in each country in the UK) who have  
10 enabled to us to further refine the intervention in a culturally sensitive way for effectiveness testing  
11 in the whole of the UK. Finally, we thank all schools, teachers, parents and pupils who have  
12 participated in the feasibility, transferability and pilot studies that have preceded this trial.  
13  
14  
15  
16  
17  
18  
19  
20  
21  
22  
23

#### 24 **FUNDING STATEMENT**

25  
26  
27 This research is funded by the National Institute for Health Research (NIHR) Public Health Research  
28 programme, grant number NIHR PHR 15/181/01. LMc is funded by the UK Medical Research Council  
29 (MRC) and Scottish Government Chief Scientist Office (CSO) at the MRC/CSO Social & Public Health  
30 Sciences Unit, University of Glasgow (MC\_UU\_12017/11, SPHSU11). The views expressed are those  
31 of the authors and not necessarily those of the NHS, the NIHR or the Department of Health. This  
32 funding source had no role in the design of this study and will not have any role during its execution,  
33 analyses, interpretation of the data, or decision to submit results.  
34  
35  
36  
37  
38  
39  
40  
41  
42

#### 43 **COMPETING INTERESTS STATEMENT**

44  
45 QUB holds copyright and the researchers do not benefit financially from its evaluation or use. We  
46 report no competing interests or conflicts of interest.  
47  
48  
49

#### 50 **TRIAL STATUS**

51  
52  
53 At the time of submission of this protocol (January 2018) optimisation of the intervention is  
54 underway, but no aspect of the trial has begun yet.  
55  
56  
57  
58  
59  
60

## AUTHORS' CONTRIBUTIONS

ML, AA, MC and LM conceived of the study and led study design. RC and ML drafted this manuscript. All authors made substantive contributions to the development of the protocol, critically reviewed and gave final approval to the manuscript. AA is responsible for management of the trial and process evaluation supported by ML. HY, AF, LMc, CB, RF, LO'H and JB contributed to the design of study and development of trial recruitment areas and PPI involvement. HY and AF led on young people's advisory group. CM and JY contributed to sample size calculation and statistical analysis plan. RH developed the economic evaluation. LO'H contributed to knowledge translation and dissemination plan.

## REFERENCES

1. Harden A, Brunton G, Fletcher A, et al. Teenage pregnancy and social disadvantage: systematic review integrating controlled trials and qualitative studies. *BMJ* 2009;339:b4254 doi: 10.1136/bmj.b4254 [published Online First: 13 November 2009].
2. Office of National Statistics (2014) International comparisons of teenage births 2014. <http://web.ons.gov.uk/ons/rel/vsob1/births-by-area-of-usual-residence-of-mother--england-and-wales/2012/sty-international-comparisons-of-teenage-pregnancy.html> (Accessed May 20th 2016)
3. Office of National Statistics. Dataset: 2015 Conception Statistics, England and Wales <https://www.ons.gov.uk/peoplepopulationandcommunity/birthsdeathsandmarriages/conceptionandfertilityrates/datasets/conceptionstatisticsenglandandwalesreferencetables> [Accessed October 2017].
4. NHS Scotland Information Services Division. Teenage Pregnancy Year of conception ending 31 December 2015. <https://www.isdscotland.org/Health-Topics/Sexual-Health/Publications/2017-07-04/2017-07-04-TeenPreg-Summary.pdf> [published 04 July 2017, Accessed October 2017].

- 1  
2  
3 5. NISRA. Births (administrative geographies) 1999-2014. Northern Ireland Statistics & Research  
4 Agency (NISRA); 2015.  
5  
6
- 7  
8 6. Department of Health Social Services and Public Safety. NI health and social care inequalities  
9 monitoring system (HSCIMS) - Health inequalities in Northern Ireland: key facts 2015;  
10 <https://www.health-ni.gov.uk/sites/default/files/publications/dhssps/hscims-2015-key-facts.pdf>  
11  
12 [published 2015, Accessed September 2017].  
13  
14
- 15  
16 7. Bonell C. Why is teenage pregnancy conceptualized as a social problem? A review of quantitative  
17 research from the USA and UK. *Cult Health Sex* 2004;6:255-72 doi:  
18 10.1080/13691050310001643025 [published Online First: 6 October 2011].  
19  
20  
21
- 22  
23 8. Beers LAS, Hollo RE. Approaching the adolescent-headed family: a review of teen parenting. *Curr*  
24 *Probl Pediatr Adolesc Health Care* 2009;39:216-33 doi: 10.1016/j.cppeds.2009.09.001 [published  
25  
26  
27  
28  
29 Online First 24 October 2009].
- 30  
31 9. Francesconi M. Adult outcomes for children of teenage mothers. *Scand J Econ* 2008;110:93-117  
32 doi: 10.1111/j.1467-9442.2008.00526.x [published Online First March 2008].  
33  
34
- 35  
36 10. Wight D, Raab GM, Henderson M, et al. Limits of teacher delivered sex education: interim  
37 behavioural outcomes from randomised trial. *BMJ* 2002;324:1430 doi: 10.1136/bmj.324.7351.1430  
38  
39 [published Online First 15 June 2002].  
40  
41
- 42  
43 11. Silva M. The effectiveness of school-based sex education programs in the promotion of abstinent  
44 behavior: a meta-analysis. *Health Educ Res* 2002;17:471-81 doi: 10.1093/her/17.4.471 [published  
45  
46  
47  
48 Online First 01 August 2002].
- 49  
50 12. Stephenson JM, Oakley A, Johnson AM, et al. A school-based randomized controlled trial of peer-  
51 led sex education in England. *Control Clin Trials* 2003;24:643-57 doi: 10.1016/S0197-2456(03)00070-  
52  
53  
54  
55  
56  
57  
58  
59  
60 9 [published Online First 13 September 2003].

- 1  
2  
3 13. Fullerton D. Promoting Positive Adolescent Sexual Health & Preventing Teenage Pregnancy-of  
4 Recent Effectiveness Research. Dublin: Crisis Pregnancy Programme [http://crisispregnancy.ie/wp-](http://crisispregnancy.ie/wp-content/uploads/2012/05/Rep22.-promoting-positive-adolescent-sexual-health-and-preventing-teenage-pregnancy-a-review-of-recent-effectiveness-research.pdf)  
5 [content/uploads/2012/05/Rep22.-promoting-positive-adolescent-sexual-health-and-preventing-](http://crisispregnancy.ie/wp-content/uploads/2012/05/Rep22.-promoting-positive-adolescent-sexual-health-and-preventing-teenage-pregnancy-a-review-of-recent-effectiveness-research.pdf)  
6 [teenage-pregnancy-a-review-of-recent-effectiveness-research.pdf](http://crisispregnancy.ie/wp-content/uploads/2012/05/Rep22.-promoting-positive-adolescent-sexual-health-and-preventing-teenage-pregnancy-a-review-of-recent-effectiveness-research.pdf) [published 2004, Accessed  
7  
8  
9  
10  
11  
12  
13  
14  
15  
16  
17  
18  
19  
20  
21  
22  
23  
24  
25  
26  
27  
28  
29  
30  
31  
32  
33  
34  
35  
36  
37  
38  
39  
40  
41  
42  
43  
44  
45  
46  
47  
48  
49  
50  
51  
52  
53  
54  
55  
56  
57  
58  
59  
60
14. Henderson M, Wight D, Raab GM, et al. Impact of a theoretically based sex education programme (SHARE) delivered by teachers on NHS registered conceptions and terminations: final results of cluster randomised trial. *BMJ* 2007;334:133 doi: 10.1136/bmj.39014.503692.55 [published Online First 18 January 2007].
15. Shepherd J, Kavanagh J, Picot J, et al. The effectiveness and cost-effectiveness of behavioural interventions for the prevention of sexually transmitted infections in young people aged 13-19: a systematic review and economic evaluation. *Health Technol Assess* 2010;14:1–206 doi: 10.3310/hta14070 [published Online First February 2010].
16. Elliott L, Henderson M, Nixon C, et al. Has untargeted sexual health promotion for young people reached its limit? A quasi-experimental study. *J Epidemiol Community Health* 2013;67:398–404 doi: 10.1136/jech-2012-201034 [published Online First 20 February 2013].
17. Downing J, Jones L, Cook P, et al. Prevention of sexually transmitted infections (STIs): a review of reviews into the effectiveness of non-clinical interventions: Evidence Briefing Update [https://www.nice.org.uk/guidance/ph3/evidence/evidence-briefing-update-prevention-of-sexually-](https://www.nice.org.uk/guidance/ph3/evidence/evidence-briefing-update-prevention-of-sexually-transmitted-infections-stis-2006-65843250)  
[transmitted-infections-stis-2006-65843250](https://www.nice.org.uk/guidance/ph3/evidence/evidence-briefing-update-prevention-of-sexually-transmitted-infections-stis-2006-65843250) [published 2006, Accessed September 2017].
18. Swann C, Bowe K, McCormick G, et al. Teenage pregnancy and parenthood: a review of reviews. Evidence briefing for Health Development Agency. London: Health Development Agency; 2003.

- 1  
2  
3 19. Ellis S, Grey A. Prevention of Sexually Transmitted Infections (STIs): a review of reviews into the  
4 effectiveness of non-clinical interventions to reduce the risk of sexual transmission. Evidence  
5 Briefing. London: Health Development Agency; 2004.  
6  
7  
8  
9  
10 20. Ingham R, Hirst J. Promoting sexual health. In: Dennison C, Warwick I, editors. Promoting Health  
11 and Wellbeing in Schools. London: Routledge; 2010.  
12  
13  
14 21. Oringanje C, Meremikwu MM, Eko H, et al. Interventions for preventing unintended pregnancies  
15 among adolescents. *Cochrane Database Syst Rev* 2009;3;2:CD005215 doi:  
16 10.1002/14651858.CD005215.pub3 [published Online First 3 February 2016].  
17  
18  
19  
20  
21 22. National Institute for Health and Care Excellence. Sexually transmitted infections and under-18  
22 conceptions: prevention; 2007.  
23  
24  
25  
26 23. Committee for Health, Social Services and Public Safety, Northern Ireland Assembly. Official  
27 Report (Hansard) Sexual Health Promotion Strategy and Action Plan 2008-2013  
28 [http://www.niassembly.gov.uk/globalassets/documents/official-reports/health/2011-2012/sexual-](http://www.niassembly.gov.uk/globalassets/documents/official-reports/health/2011-2012/sexual-health-promotion-strategy-and-action-plan-2008-2013.pdf)  
29 [health-promotion-strategy-and-action-plan-2008-2013.pdf](http://www.niassembly.gov.uk/globalassets/documents/official-reports/health/2011-2012/sexual-health-promotion-strategy-and-action-plan-2008-2013.pdf) [published 18 April 2012, Accessed  
30 September 2017].  
31  
32  
33  
34  
35  
36  
37 24. The Scottish Government. Pregnancy and Parenthood in Young People Strategy 2016-2026  
38 [https://www.scottishwomensconvention.org/content/outcomes-scotland-2016/Pregnancy-and-](https://www.scottishwomensconvention.org/content/outcomes-scotland-2016/Pregnancy-and-Parenthood.pdf)  
39 [Parenthood.pdf](https://www.scottishwomensconvention.org/content/outcomes-scotland-2016/Pregnancy-and-Parenthood.pdf) [published March 2016, Accessed September 2017].  
40  
41  
42  
43  
44 25. WHO, 2016. Growing up unequal: gender and socioeconomic differences in young people's  
45 health and well-being. Health Behaviour in School-aged Children (HBSC) study: international report  
46 from the 2013/2014 survey. Health Policy for Children and Adolescents, No. 7; 2016  
47 [http://www.euro.who.int/\\_data/assets/pdf\\_file/0003/303438/HSBC-No.7-Growing-up-unequal-](http://www.euro.who.int/_data/assets/pdf_file/0003/303438/HSBC-No.7-Growing-up-unequal-Full-Report.pdf?ua=1)  
48 [Full-Report.pdf?ua=1](http://www.euro.who.int/_data/assets/pdf_file/0003/303438/HSBC-No.7-Growing-up-unequal-Full-Report.pdf?ua=1) [Accessed September 2017].  
49  
50  
51  
52  
53  
54  
55  
56  
57  
58  
59  
60

- 1  
2  
3 26. Northern Ireland Statistics and Research Agency. Central Survey Unit. (2015). Young Persons'  
4 Behaviour and Attitudes Survey, 2013. [data collection]. UK Data Service. SN: 7624,  
5 <http://doi.org/10.5255/UKDA-SN-7624-1>  
6  
7  
8  
9  
10 27. Kirby D, Laris B, Rolleri L. Sex and HIV education programs for youth: Their impact and important  
11 characteristics <http://recapp.etr.org/recapp/documents/programs/SexHIVedProgs.pdf> [published 13  
12 May 2006, Accessed September 2017].  
13  
14  
15  
16 28. Kirby D. Effective approaches to reducing adolescent unprotected sex, pregnancy, and  
17 childbearing. *J Sex Res* 2002;39:51–7 doi: 10.1080/00224490209552120 [published Online First 11  
18 January 2010].  
19  
20  
21  
22  
23 29. Kirby D. Emerging Answers 2007: Research findings on programs to reduce teen pregnancy and  
24 sexually transmitted diseases. Washington DC: National Campaign to Prevent Teen and Unplanned  
25 Pregnancy <http://www.siecus.org/index.cfm?fuseaction=Feature.showFeature&featureID=1151>  
26 [published November 2007, Accessed September 2017].  
27  
28  
29  
30  
31  
32 30. Robin L, Dittus P, Whitaker D, et al. Behavioral interventions to reduce incidence of HIV, STD, and  
33 pregnancy among adolescents: a decade in review. *J Adolesc Health* 2004;34:3–26 doi:  
34 10.1016/S1054-139X(03)00244-1 [published Online First 29 December 2003].  
35  
36  
37  
38  
39 31. Bailey JV, Murray E, Rait G, et al. Interactive computer-based interventions for sexual health  
40 promotion. *Cochrane Database Syst Rev* 2010;9:CD006483 doi: 10.1002/14651858.CD006483.pub2  
41 [published Online First 8 September 2010].  
42  
43  
44  
45  
46 32. Guse K, Levine D, Martins S, et al. Interventions using new digital media to improve adolescent  
47 sexual health: A systematic review. *J Adolesc Health* 2012;51:535–43 doi:  
48 10.1016/j.jadohealth.2012.03.014 [published First Online 4 May 2012].  
49  
50  
51  
52  
53  
54  
55  
56  
57  
58  
59  
60

1  
2  
3 33. Noar SM, Pierce LB, Black HG. Can Computer-Mediated Interventions Change Theoretical  
4 Mediators of Safer Sex? A Meta-Analysis. *Hum Commun Res* 2010;36:261–97 doi: 10.1111/j.1468-  
5 2958.2010.01376.x [published Online First 7 June 2010].  
6  
7

8  
9  
10 34. Lohan M, Cruise S, O'Halloran P, et al. Adolescent men's attitudes and decision-making in  
11 relation to an unplanned pregnancy. Responses to an interactive video drama. *Soc Sci Med*  
12 2011;72:1507–14 doi: 10.1016/j.socscimed.2011.02.044 [published Online First 24 March 2011].  
13  
14

15  
16 35. Smith LH, Guthrie BJ, Oakley DJ. Studying adolescent male sexuality: Where are we? *J Youth*  
17 *Adolesc* 2005;34:361–77 doi: 10.1007/s10964-005-5762-5  
18  
19

20  
21 36. Guttmacher Institute. In their own right: Addressing the sexual and reproductive health needs of  
22 American men [https://www.guttmacher.org/report/their-own-right-addressing-sexual-and-](https://www.guttmacher.org/report/their-own-right-addressing-sexual-and-reproductive-health-needs-american-men)  
23 [reproductive-health-needs-american-men](https://www.guttmacher.org/report/their-own-right-addressing-sexual-and-reproductive-health-needs-american-men) [published October 2003, Accessed September 2017].  
24  
25  
26

27  
28 37. Marsiglio W, Ries A, Sonenstein F, et al. It's a Guy Thing: Boys, Young Men, and Teen Pregnancy  
29 Prevention. The National Campaign to Prevent Teen Pregnancy  
30 <https://thenationalcampaign.org/resource/its-guy-thing> [published February 2006, Accessed  
31 September 2017].  
32  
33  
34  
35

36  
37 38. Lindberg LD, Sonfield A, Gemmill A. Reassessing adolescent male sexual and reproductive health  
38 in the United States: research and recommendations. *Am J Mens Health* 2008;2:40–56 doi:  
39 10.1177/1557988307309460 [published Online First 5 December 2007].  
40  
41  
42  
43

44 39. WHO. Evidence for gender responsive actions to prevent and manage adolescent pregnancy  
45 [http://www.euro.who.int/\\_data/assets/pdf\\_file/0008/158093/316637\\_WHO\\_brochure\\_226x226\\_](http://www.euro.who.int/_data/assets/pdf_file/0008/158093/316637_WHO_brochure_226x226_5-AdolecentPregnancy.pdf)  
46 [5-AdolecentPregnancy.pdf](http://www.euro.who.int/_data/assets/pdf_file/0008/158093/316637_WHO_brochure_226x226_5-AdolecentPregnancy.pdf) [published 2011, Accessed September 2017].  
47  
48  
49

50  
51 40. WHO. Health 2020: a European policy framework supporting action across government and  
52 society for health and well-being  
53 [http://www.euro.who.int/\\_data/assets/pdf\\_file/0006/199536/Health2020-Short.pdf?ua=1](http://www.euro.who.int/_data/assets/pdf_file/0006/199536/Health2020-Short.pdf?ua=1)  
54  
55  
56  
57



1  
2  
3 [published 2013, Accessed September 2017].  
4

5 41. WHO. Health policy framework supporting action across government and society for health and  
6 well-being. 2012.  
7

8  
9  
10 42. Ries A, Sonenstein F. What works for boys: A re-examination of coeducational school curricula.  
11 In: Troccoli K, editor. It's a guy thing boys young men and teen pregnancy prevention. Washington  
12 DC: National Campaign to Prevent Teen Pregnancy 2006:101–38.  
13  
14

15  
16  
17 43. Bennett SE, Assefi NP. School-based teenage pregnancy prevention programs: a systematic  
18 review of randomized controlled trials. *J Adolesc Health* 2005;36:72–81 doi:  
19 <https://doi.org/10.1016/j.jadohealth.2003.11.097> [published Online First 18 January 2005].  
20  
21  
22

23  
24 44. Craig P, Dieppe P, Macintyre S, et al. Developing and evaluating complex interventions: the new  
25 Medical Research Council guidance. *BMJ* 2008;337:a1655 doi: 10.1136/bmj.a1655 [published Online  
26 First 29 September 2008].  
27  
28

29  
30  
31 45. Lohan M, Aventin Á, Maguire L, et al. Increasing boys' and girls' intention to avoid teenage  
32 pregnancy: a cluster randomised control feasibility trial of an interactive video drama based  
33 intervention in post-primary schools in Northern Ireland. *Public Health Res* 2017;5 doi:  
34 10.3310/phr05010 [published Online First March 2017].  
35  
36  
37

38  
39  
40 46. Crawford C, Cribb J, Kelly E. Teenage Pregnancy in England. Centre for the Analysis of Youth  
41 Transitions <https://www.ifs.org.uk/publications/6702> [published 21 May 2013, Accessed September  
42 2017].  
43  
44

45  
46  
47 47. Jones L, Bates G, Downing J, et al. A review of the effectiveness and cost-effectiveness of  
48 personal social and health education in secondary schools focussing on sex and relationships and  
49 alcohol education for young people aged 11-19 years. Final Report  
50 [https://www.nice.org.uk/guidance/gid-phg0/documents/pshe-evidence-review-secondary-  
51 education-and-fe2](https://www.nice.org.uk/guidance/gid-phg0/documents/pshe-evidence-review-secondary-education-and-fe2) [published October 2009, Accessed September 2017].  
52  
53  
54  
55  
56  
57

1  
2  
3 48. Education and Training Inspectorate NI. Report of an evaluation of relationships and sexuality  
4 education in post-primary schools [https://www.etini.gov.uk/publications/report-evaluation-](https://www.etini.gov.uk/publications/report-evaluation-relationships-and-sexuality-education-post-primary-schools)  
5 [relationships-and-sexuality-education-post-primary-schools](https://www.etini.gov.uk/publications/report-evaluation-relationships-and-sexuality-education-post-primary-schools) [published 11 January 2011, Accessed  
6  
7  
8  
9 September 2017].

10  
11  
12 49. Ofsted. Not yet good enough: personal, social, health and economic education in schools  
13 [http://webarhive.nationalarchives.gov.uk/20141107025925/http://www.ofsted.gov.uk/resources/](http://webarhive.nationalarchives.gov.uk/20141107025925/http://www.ofsted.gov.uk/resources/not-yet-good-enough-personal-social-health-and-economic-education-schools)  
14 [not-yet-good-enough-personal-social-health-and-economic-education-schools](http://webarhive.nationalarchives.gov.uk/20141107025925/http://www.ofsted.gov.uk/resources/not-yet-good-enough-personal-social-health-and-economic-education-schools) [published 01 May  
15  
16  
17  
18 2013, Accessed September 2017].

19  
20  
21 50. Chin HB, Sipe TA, Elder R, et al. The effectiveness of group-based comprehensive risk-reduction  
22 and abstinence education interventions to prevent or reduce the risk of adolescent pregnancy,  
23 human immunodeficiency virus, and sexually transmitted infections: two systematic reviews for the  
24 Guide to Community Preventive Services. *Am J Prev Med* 2012;42:272–94 doi:  
25 10.1016/j.amepre.2011.11.006 [published Online First 14 February 2012].  
26  
27  
28  
29  
30  
31

32 51. Santelli JS, Lindberg LD, Finer LB, et al. Explaining recent declines in adolescent pregnancy in the  
33 United States: the contribution of abstinence and improved contraceptive use. *Am J Public Health*  
34 2007;97:150–6 doi: 10.2105/AJPH.2006.089169 [published Online First 10 October 2011].  
35  
36  
37  
38

39 52. Parkes A, Wight D, Henderson M, et al. Contraceptive method at first sexual intercourse and  
40 subsequent pregnancy risk: findings from a secondary analysis of 16-year-old girls from the RIPPLE  
41 and SHARE studies. *J Adolesc Health* 2009;44:55–63 doi: 10.1016/j.jadohealth.2008.06.006  
42 [published Online First 18 October 2008].  
43  
44  
45  
46  
47

48 53. Eldridge SM, Costelloe CE, Kahan BC, et al. How big should the pilot study for my cluster  
49 randomised trial be? *Stat Methods Med Res* 2016;25:1039-56 doi: 10.1177/0962280215588242  
50 [published First Online 12 June 2015].  
51  
52  
53  
54  
55  
56  
57  
58  
59  
60

- 1  
2  
3 54. Aventin A, Lohan M, Maguire L, et al. Recruiting faith- and non-faith-based schools, adolescents  
4 and parents to a cluster randomised sexual-health trial: experiences, challenges and lessons from  
5 the mixed-methods Jack Feasibility Trial. *Trials* 2016;17:365 doi: 10.1186/s13063-016-1506-y  
6 [published Online First 29 July 2016].  
7  
8  
9  
10  
11 55. Wight D, Abraham C, Scott S. Towards a psycho-social theoretical framework for sexual health  
12 promotion. *Health Educ Res* 1998;13:317–30 doi: 10.1093/her/13.3.317-a  
13  
14  
15  
16 56. NHS Health Scotland. An overview of the effectiveness of sexual health improvement  
17 interventions. Final Report. June 2010 [http://www.healthscotland.com/uploads/documents/13786-](http://www.healthscotland.com/uploads/documents/13786-REO28-OverviewEffectivenessSexualHealthInterventions.pdf)  
18 [REO28-OverviewEffectivenessSexualHealthInterventions.pdf](http://www.healthscotland.com/uploads/documents/13786-REO28-OverviewEffectivenessSexualHealthInterventions.pdf) [Accessed September 2017].  
19  
20  
21  
22  
23 57. Ajzen I, Madden TJ. Prediction of goal-directed behavior: Attitudes, intentions, and perceived  
24 behavioral control. *J Exp Soc Psychol* 1986;22:453–74 doi: 10.1016/0022-1031(86)90045-4  
25 [published Online First 27 August 2004].  
26  
27  
28  
29  
30 58. Ajzen I. The theory of planned behaviour: reactions and reflections. *Psychol Health*  
31 2011;26:1113–27 doi: 10.1080/08870446.2011.613995 [published Online First 20 September 2011].  
32  
33  
34  
35 59. Moore G, Evans R. What theory, for whom and in which context? Reflections on the application  
36 of theory in the development and evaluation of complex population health intervention. *SSM -*  
37 *Population Health* 2017;3:132-5 doi: 10.1016/j.ssmph.2016.12.005 [published Online First 13  
38 December 2016].  
39  
40  
41  
42  
43 60. Philliber S, Kaye JW, Herrling S, West E. Preventing pregnancy and improving health care access  
44 among teenagers: An evaluation of the Children’s Aid Society-Carrera Program. *Perspect Sex Reprod*  
45 *Health* 2002;244–51 doi: 10.1363/3424402 [published Online First 1 September 2002].  
46  
47  
48  
49  
50 61. Coyle K, Basen-Engquist K, Kirby D, et al. Safer choices: reducing teen pregnancy, HIV, and STDs.  
51 *Public Health Rep* 2001;116(Suppl 1):82–93 doi: 10.1093/phr/116.S1.82  
52  
53  
54  
55  
56  
57  
58  
59  
60

- 1  
2  
3 62. Aventin Á, Lohan M, O'Halloran P, et al. Design and development of a film-based Intervention  
4 about teenage men and unintended pregnancy: Applying the Medical Research Council Framework  
5 in practice. *Eval Progr Plan* 2015;49:19–30 doi: 10.1016/j.evalprogplan.2014.11.003 [published  
6 Online First 15 November 2014].  
7  
8  
9  
10  
11 63. NHS Health Scotland. Evaluation of Healthy Respect Phase Two: Final Report March 2010  
12 [http://www.healthscotland.com/uploads/documents/12159-](http://www.healthscotland.com/uploads/documents/12159-HealthyRespectEvaluationReport_3342.pdf)  
13 [HealthyRespectEvaluationReport\\_3342.pdf](http://www.healthscotland.com/uploads/documents/12159-HealthyRespectEvaluationReport_3342.pdf) [Accessed September 2017].  
14  
15  
16  
17  
18 64. Guttmacher Institute. Adolescent sexual and reproductive health in the United States  
19 <https://www.guttmacher.org/fact-sheet/american-teens-sexual-and-reproductive-health> [Accessed  
20 September 2017].  
21  
22  
23  
24  
25 65. Carswell K, McCarthy O, Murray E, et al. Integrating psychological theory into the design of an  
26 online intervention for sexual health: The sexunzipped website. *JMIR Research Protocols* 2012;1 doi:  
27 10.2196/resprot.2114 {published Online First 19 November 2012}.  
28  
29  
30  
31  
32 66. Elliott L, Henderson M, Wight D, et al. Evaluation of healthy respect phase two: Final report.  
33 2010. Edinburgh: NHS Health Scotland.  
34  
35  
36  
37 67. Fullard W, Johnston D, Lief H. The sexual knowledge and attitude test for adolescents. In: Davis  
38 C, Yarber W, Bauserman R, Schreer G, Davis S, editors. *Handbook of sexuality-related measures*.  
39 London: SAGE; 2005. p. 33-35.  
40  
41  
42  
43 68. Kirby D. *Sexuality Education: An evaluation of programs and their Effects*. An executive summary.  
44 1984. Washington DC: Network Publications.  
45  
46  
47  
48 69. Pleck JH, Sonenstein FL, Ku LC. Masculinity ideology: Its impact on adolescent males'  
49 heterosexual relationships. *J Soc Issues* 1993;49:1-29 doi: 10.1111/j.1540-4560.1993.tb01166.x  
50  
51  
52  
53 [published Online First 14 April 2010].  
54  
55  
56  
57  
58  
59  
60

- 1  
2  
3 70. Lottes I, Kuriloff P. Sexual socialization differences by gender, Greek membership, ethnicity and  
4 religious background. *Psychol Women Quar* 1994;18:203-19 doi: 10.1111/j.1471-  
5 6402.1994.tb00451.x {publish Online First 28 July 2006}.  
6  
7  
8  
9  
10 71. Quinn-Nilas C, Milhausen RR, Breuer R, Bailey J, Pavlou M, DiClemente RJ, Wingood GM.  
11 Validation of the Sexual Communication Self-Efficacy Scale. *Health Education & Behavior*. 2016  
12 Apr;43(2):165-71.  
13  
14  
15  
16  
17 72. May C. Towards a general theory of implementation. *Implement Sci* 2013;8:18 doi:  
18 10.1186/1748-5908-8-18 [published Online First 13 February 2013].  
19  
20  
21  
22 73. Moore GF, Audrey S, Barker M, et al. Process evaluation of complex interventions: Medical  
23 Research Council guidance. *BMJ* 2015;350:h1258 doi: 10.1136/bmj.h1258 [published 19 March  
24 2015].  
25  
26  
27  
28  
29 74. National Institute for Health and Care Excellence. Methods for the development of NICE Public  
30 Health Guidance (third edition) <https://www.nice.org.uk/process/pmg4/chapter/introduction>  
31 [published September 2012, accessed September 2017].  
32  
33  
34  
35  
36 75. Edwards RT, Charles JM, Lloyd-Williams H. Public health economics: a systematic review of  
37 guidance for the economic evaluation of public health interventions and discussion of key  
38 methodological issues. *BMC Public Health* 2013;13:1001 doi: 10.1186/1471-2458-13-1001 [published  
39 Online First 24 October 2013].  
40  
41  
42  
43  
44  
45 76. Bailey J, Mann S, Wayal S, et al. Sexual health promotion for young people delivered via digital  
46 media: a scoping review. *Public Health Res* 2015;3 doi: 10.3310/phr03130 [published Online First  
47 November 2015].  
48  
49  
50  
51  
52 77. Campbell MK, Piaggio G, Elbourne DR, et al. Consort 2010 statement: extension to cluster  
53 randomised trials. *BMJ* 2012;345:e5661 doi: 10.1136/bmj.e5661 [published Online First 04  
54 September 2012].  
55  
56  
57  
58  
59  
60

- 1  
2  
3 78. Kahan BC, Jairath V, Doré CJ, et al. The risks and rewards of covariate adjustment in randomized  
4 trials: an assessment of 12 outcomes from 8 studies. *Trials* 2014;15:1 doi: 10.1186/1745-6215-15-  
5 139 [published Online First 23 April 2014].  
6  
7  
8  
9  
10 79. Kraemer HC, Wilson GT, Fairburn CG, et al. Mediators and moderators of treatment effects in  
11 randomized clinical trials. *Arch Gen Psychiatry* 2002;59:877–83 doi: 10.1001/archpsyc.59.10.877  
12  
13  
14 80. Braun V, Clarke V. Using thematic analysis in psychology. *Qual Res Psychol* 2006;3:77–101 doi:  
15 10.1191/1478088706qp063oa [published Online First 21 July 2008].  
16  
17  
18  
19 81. Lincoln YS, Guba EG. *Naturalistic Inquiry*. Newbury Park CA: Sage; 1985.  
20  
21  
22 82. Hyde A, Howlett E, Brady D, et al. The focus group method: Insights from focus group interviews  
23 on sexual health with adolescents. *Soc Sci Med* 2005;61:2588–99 doi:  
24 <https://doi.org/10.1016/j.socscimed.2005.04.040> [published Online First 13 June 2005].  
25  
26  
27  
28 83. Department of Education NI. Institution search. [http://apps.education-](http://apps.education-ni.gov.uk/appinstitutes/default.aspx)  
29 [ni.gov.uk/appinstitutes/default.aspx](http://apps.education-ni.gov.uk/appinstitutes/default.aspx) [Accessed October 2017].  
30  
31  
32  
33 84. Schulz KF, Altman DG, Moher D, for the CONSORT Group. CONSORT 2010 Statement: updated  
34 guidelines for reporting parallel group randomised trials. *BMJ* 2010;340:c332 doi: 10.1136/bmj.c332  
35 [published Online First 24 March 2010].  
36  
37  
38  
39 85. Chan A-W, Tetzlaff JM, Altman, DG, et al. SPIRIT 2013 Statement: Defining standard protocol  
40 items for clinical trials. *Ann Intern Med* 2013;158:200-7 doi: 10.7326/0003-4819-158-3-201302050-  
41 00583  
42  
43  
44  
45  
46  
47 86. Chan A-W, Tetzlaff JM, Gøtzsche PC, et al. SPIRIT 2013 explanation and elaboration: guidance for  
48 protocols of clinical trials. *BMJ* 2013;346:e7568 doi: 10.1136/bmj.e7586 [published Online First 09  
49 January 2013].  
50  
51  
52  
53  
54  
55  
56  
57  
58  
59  
60

1  
2  
3 87. Hoffmann TC, Glasziou PP, Boutron I, et al. Better reporting of interventions: template for  
4 intervention description (TIDieR) checklist and guide. *BMJ* 2014;348:g1687 doi: 10.1136/bmj.g1687  
5 [published Online First 07 March 2014].  
6  
7

8  
9  
10 88. WHO Trial Registration Data Set (Version 1.2.1). Available at  
11 <http://www.who.int/ictip/network/trds/en/> [Accessed 07.08.17]  
12

13  
14 89. Vellinga A, Cormican M, Hanahoe B, et al. Opt-out as an acceptable method of obtaining consent  
15 in medical research: a short report. *BMC Med Res Meth* 2011;11:40 doi: 10.1186/1471-2288-11-40  
16 [published Online First 6 April 2011].  
17  
18

19  
20 90. Liu C, Cox RB, Washburn IJ, et al. The effects of requiring parental consent for research on  
21 adolescents' risk behaviors: A meta-analysis. *J of Adolesc Health* 2017;61:45-52 doi:  
22 10.1016/j.jadohealth.2017.01.015 [published Online First 28 March 2017].  
23  
24  
25  
26  
27  
28  
29  
30  
31  
32  
33

#### 34 **FIGURE LEGENDS**

35  
36 **Figure 1:** The JACK Trial Flowchart  
37

38  
39 **Figure 2:** School recruitment strategy  
40

41  
42 **Figure 3:** *If I Were Jack* Theory of Change Logic Model  
43

44  
45 **Figure 4:** Integration of process evaluation with experimental design methodology to achieve  
46 research objectives  
47

48  
49 **Figure 5:** Current and future impacts of *If I Were Jack* on costs and benefits  
50  
51  
52  
53  
54  
55  
56  
57  
58  
59  
60

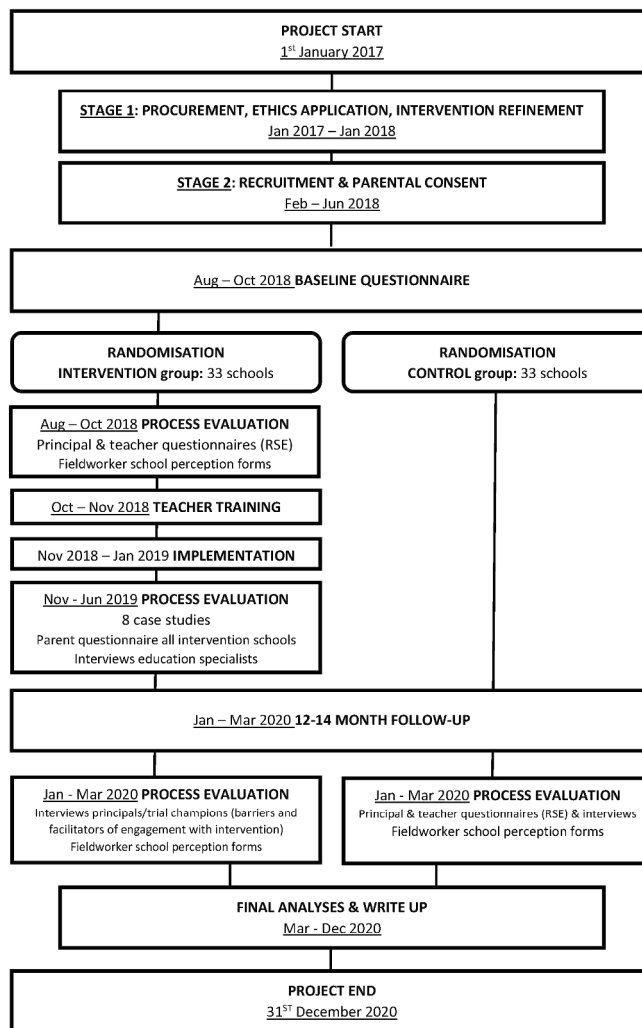

Figure 1: The JACK Trial Flowchart

210x297mm (300 x 300 DPI)



1  
2  
3  
4  
5  
6  
7  
8  
9  
10  
11  
12  
13  
14  
15  
16  
17  
18  
19  
20  
21  
22  
23  
24  
25  
26  
27  
28  
29  
30  
31  
32  
33  
34  
35  
36  
37  
38  
39  
40  
41  
42  
43  
44  
45  
46  
47  
48  
49  
50  
51  
52  
53  
54  
55  
56  
57  
58  
59  
60

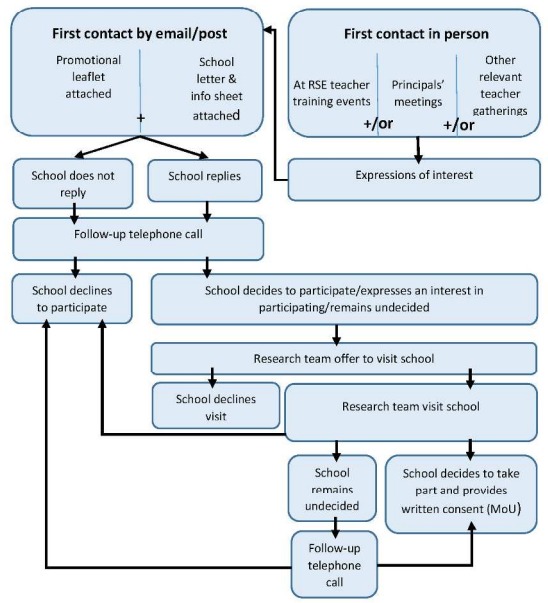

Figure 2: School recruitment strategy

210x297mm (300 x 300 DPI)

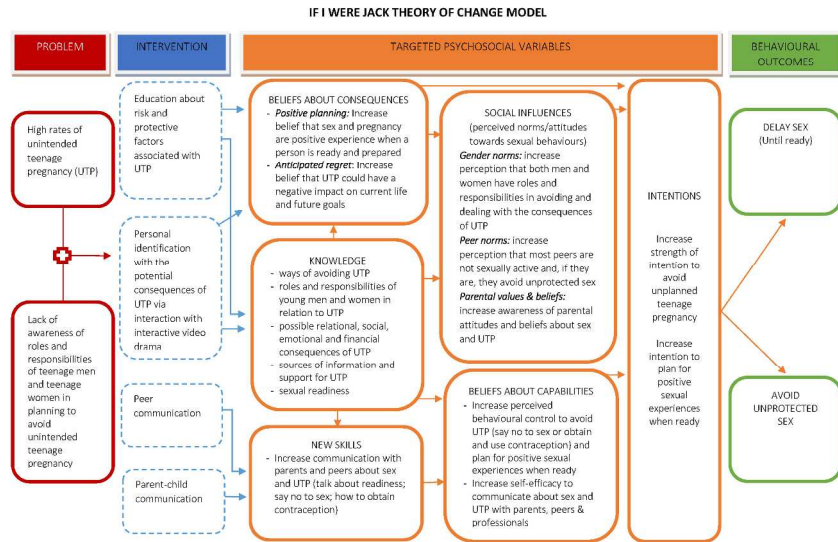

Figure 3: If I Were Jack Theory of Change Logic Model

297x210mm (300 x 300 DPI)

1  
2  
3  
4  
5  
6  
7  
8  
9  
10  
11  
12  
13  
14  
15  
16  
17  
18  
19  
20  
21  
22  
23  
24  
25  
26  
27  
28  
29  
30  
31  
32  
33  
34  
35  
36  
37  
38  
39  
40  
41  
42  
43  
44  
45  
46  
47  
48  
49  
50  
51  
52  
53  
54  
55  
56  
57  
58  
59  
60

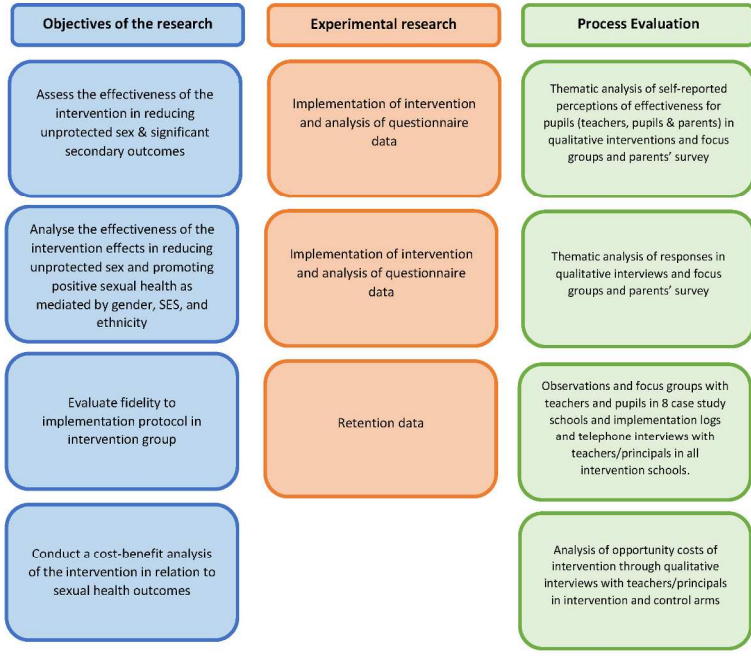

Figure 4: Integration of process evaluation with experimental design methodology to achieve research objectives

210x297mm (300 x 300 DPI)

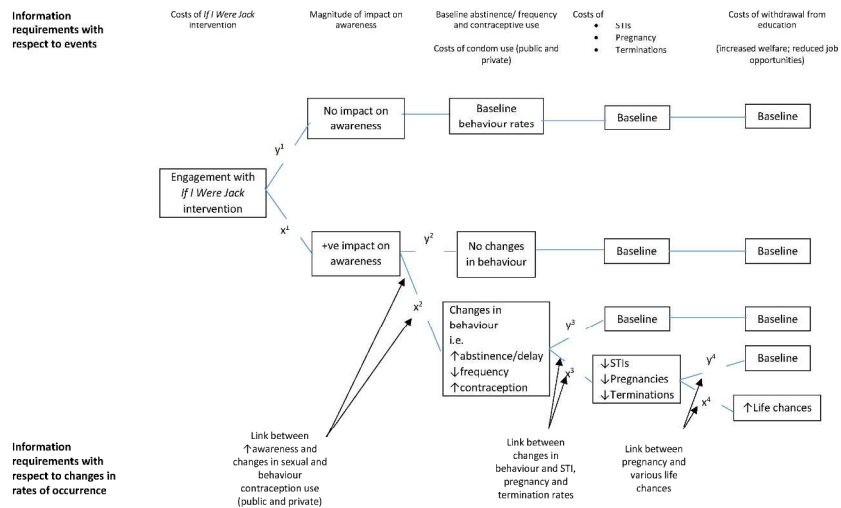

Figure 5: Current and future impacts of If I Were Jack on costs and benefits

297x210mm (300 x 300 DPI)

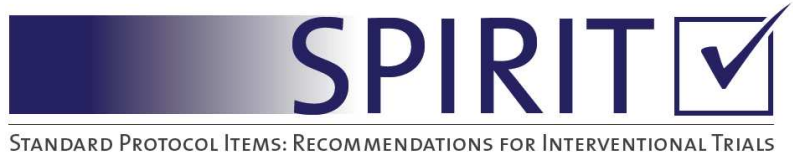

1  
2  
3  
4  
5  
6  
7  
8  
9  
10  
11  
12  
13  
14  
15  
16  
17  
18  
19  
20  
21  
22  
23  
24  
25  
26  
27  
28  
29  
30  
31  
32  
33  
34  
35  
36  
37  
38  
39  
40  
41  
42  
43  
44  
45  
46  
47

SPIRIT 2013 Checklist: Recommended items to address in a clinical trial protocol and related documents\*

| Section/item                      | Item No | Description                                                                                                                                                                                                                                                                              | Addressed on page number |
|-----------------------------------|---------|------------------------------------------------------------------------------------------------------------------------------------------------------------------------------------------------------------------------------------------------------------------------------------------|--------------------------|
| <b>Administrative information</b> |         |                                                                                                                                                                                                                                                                                          |                          |
| Title                             | 1       | Descriptive title identifying the study design, population, interventions, and, if applicable, trial acronym                                                                                                                                                                             | _____1_____              |
| Trial registration                | 2a      | Trial identifier and registry name. If not yet registered, name of intended registry                                                                                                                                                                                                     | _____2_____              |
|                                   | 2b      | All items from the World Health Organization Trial Registration Data Set                                                                                                                                                                                                                 | 22 (sup file 3)          |
| Protocol version                  | 3       | Date and version identifier                                                                                                                                                                                                                                                              | _____                    |
| Funding                           | 4       | Sources and types of financial, material, and other support                                                                                                                                                                                                                              | _____24_____             |
| Roles and responsibilities        | 5a      | Names, affiliations, and roles of protocol contributors                                                                                                                                                                                                                                  | _____1, 24_____          |
|                                   | 5b      | Name and contact information for the trial sponsor                                                                                                                                                                                                                                       | _____                    |
|                                   | 5c      | Role of study sponsor and funders, if any, in study design; collection, management, analysis, and interpretation of data; writing of the report; and the decision to submit the report for publication, including whether they will have ultimate authority over any of these activities | _____24_____             |
|                                   | 5d      | Composition, roles, and responsibilities of the coordinating centre, steering committee, endpoint adjudication committee, data management team, and other individuals or groups overseeing the trial, if applicable (see Item 21a for data monitoring committee)                         | _____                    |

## Introduction

|                          |    |                                                                                                                                                                                                           |     |
|--------------------------|----|-----------------------------------------------------------------------------------------------------------------------------------------------------------------------------------------------------------|-----|
| Background and rationale | 6a | Description of research question and justification for undertaking the trial, including summary of relevant studies (published and unpublished) examining benefits and harms for each intervention        | 4,5 |
|                          | 6b | Explanation for choice of comparators                                                                                                                                                                     | 4,5 |
| Objectives               | 7  | Specific objectives or hypotheses                                                                                                                                                                         | 5,6 |
| Trial design             | 8  | Description of trial design including type of trial (eg, parallel group, crossover, factorial, single group), allocation ratio, and framework (eg, superiority, equivalence, noninferiority, exploratory) | 6   |

## Methods: Participants, interventions, and outcomes

|                      |     |                                                                                                                                                                                                                                                                                                                                                                                |          |
|----------------------|-----|--------------------------------------------------------------------------------------------------------------------------------------------------------------------------------------------------------------------------------------------------------------------------------------------------------------------------------------------------------------------------------|----------|
| Study setting        | 9   | Description of study settings (eg, community clinic, academic hospital) and list of countries where data will be collected. Reference to where list of study sites can be obtained                                                                                                                                                                                             | 6        |
| Eligibility criteria | 10  | Inclusion and exclusion criteria for participants. If applicable, eligibility criteria for study centres and individuals who will perform the interventions (eg, surgeons, psychotherapists)                                                                                                                                                                                   | 6,7,13   |
| Interventions        | 11a | Interventions for each group with sufficient detail to allow replication, including how and when they will be administered                                                                                                                                                                                                                                                     | 10-13    |
|                      | 11b | Criteria for discontinuing or modifying allocated interventions for a given trial participant (eg, drug dose change in response to harms, participant request, or improving/worsening disease)                                                                                                                                                                                 |          |
|                      | 11c | Strategies to improve adherence to intervention protocols, and any procedures for monitoring adherence (eg, drug tablet return, laboratory tests)                                                                                                                                                                                                                              | 16       |
|                      | 11d | Relevant concomitant care and interventions that are permitted or prohibited during the trial                                                                                                                                                                                                                                                                                  |          |
| Outcomes             | 12  | Primary, secondary, and other outcomes, including the specific measurement variable (eg, systolic blood pressure), analysis metric (eg, change from baseline, final value, time to event), method of aggregation (eg, median, proportion), and time point for each outcome. Explanation of the clinical relevance of chosen efficacy and harm outcomes is strongly recommended | 14,15    |
| Participant timeline | 13  | Time schedule of enrolment, interventions (including any run-ins and washouts), assessments, and visits for participants. A schematic diagram is highly recommended (see Figure)                                                                                                                                                                                               | Figure 1 |

1

2

3 Sample size 14 Estimated number of participants needed to achieve study objectives and how it was determined, including \_\_\_\_\_7,8\_\_\_\_\_

4 clinical and statistical assumptions supporting any sample size calculations

5

6 Recruitment 15 Strategies for achieving adequate participant enrolment to reach target sample size \_\_\_\_\_8-10\_\_\_\_\_

7

8 **Methods: Assignment of interventions (for controlled trials)**

9

10 Allocation:

11

12 Sequence generation 16a Method of generating the allocation sequence (eg, computer-generated random numbers), and list of any \_\_\_\_\_10\_\_\_\_\_

13 factors for stratification. To reduce predictability of a random sequence, details of any planned restriction

14 (eg, blocking) should be provided in a separate document that is unavailable to those who enrol participants

15 or assign interventions

16

17 Allocation concealment mechanism 16b Mechanism of implementing the allocation sequence (eg, central telephone; sequentially numbered, \_\_\_\_\_10\_\_\_\_\_

18 opaque, sealed envelopes), describing any steps to conceal the sequence until interventions are assigned

19

20

21 Implementation 16c Who will generate the allocation sequence, who will enrol participants, and who will assign participants to \_\_\_\_\_10\_\_\_\_\_

22 interventions

23

24 Blinding (masking) 17a Who will be blinded after assignment to interventions (eg, trial participants, care providers, outcome \_\_\_\_\_6\_\_\_\_\_

25 assessors, data analysts), and how

26

27 17b If blinded, circumstances under which unblinding is permissible, and procedure for revealing a participant's \_\_\_\_\_

28 allocated intervention during the trial

29

30

31 **Methods: Data collection, management, and analysis**

32

33 Data collection methods 18a Plans for assessment and collection of outcome, baseline, and other trial data, including any related \_\_\_\_\_15-20\_\_\_\_\_

34 processes to promote data quality (eg, duplicate measurements, training of assessors) and a description of

35 study instruments (eg, questionnaires, laboratory tests) along with their reliability and validity, if known.

36 Reference to where data collection forms can be found, if not in the protocol

37

38 18b Plans to promote participant retention and complete follow-up, including list of any outcome data to be \_\_\_\_\_8-10\_\_\_\_\_

39 collected for participants who discontinue or deviate from intervention protocols

40

41

42

43

44

|    |                                 |     |                                                                                                                                                                                                                                                                                                                                       |           |
|----|---------------------------------|-----|---------------------------------------------------------------------------------------------------------------------------------------------------------------------------------------------------------------------------------------------------------------------------------------------------------------------------------------|-----------|
| 1  |                                 |     |                                                                                                                                                                                                                                                                                                                                       |           |
| 2  |                                 |     |                                                                                                                                                                                                                                                                                                                                       |           |
| 3  | Data management                 | 19  | Plans for data entry, coding, security, and storage, including any related processes to promote data quality (eg, double data entry; range checks for data values). Reference to where details of data management procedures can be found, if not in the protocol                                                                     | _____     |
| 4  |                                 |     |                                                                                                                                                                                                                                                                                                                                       |           |
| 5  |                                 |     |                                                                                                                                                                                                                                                                                                                                       |           |
| 6  |                                 |     |                                                                                                                                                                                                                                                                                                                                       |           |
| 7  | Statistical methods             | 20a | Statistical methods for analysing primary and secondary outcomes. Reference to where other details of the statistical analysis plan can be found, if not in the protocol                                                                                                                                                              | __20-21__ |
| 8  |                                 |     |                                                                                                                                                                                                                                                                                                                                       |           |
| 9  |                                 |     |                                                                                                                                                                                                                                                                                                                                       |           |
| 10 |                                 | 20b | Methods for any additional analyses (eg, subgroup and adjusted analyses)                                                                                                                                                                                                                                                              | __20-21__ |
| 11 |                                 |     |                                                                                                                                                                                                                                                                                                                                       |           |
| 12 |                                 | 20c | Definition of analysis population relating to protocol non-adherence (eg, as randomised analysis), and any statistical methods to handle missing data (eg, multiple imputation)                                                                                                                                                       | __20-21__ |
| 13 |                                 |     |                                                                                                                                                                                                                                                                                                                                       |           |
| 14 |                                 |     |                                                                                                                                                                                                                                                                                                                                       |           |
| 15 | <b>Methods: Monitoring</b>      |     |                                                                                                                                                                                                                                                                                                                                       |           |
| 16 |                                 |     |                                                                                                                                                                                                                                                                                                                                       |           |
| 17 | Data monitoring                 | 21a | Composition of data monitoring committee (DMC); summary of its role and reporting structure; statement of whether it is independent from the sponsor and competing interests; and reference to where further details about its charter can be found, if not in the protocol. Alternatively, an explanation of why a DMC is not needed | __23__    |
| 18 |                                 |     |                                                                                                                                                                                                                                                                                                                                       |           |
| 19 |                                 |     |                                                                                                                                                                                                                                                                                                                                       |           |
| 20 |                                 |     |                                                                                                                                                                                                                                                                                                                                       |           |
| 21 |                                 |     |                                                                                                                                                                                                                                                                                                                                       |           |
| 22 |                                 | 21b | Description of any interim analyses and stopping guidelines, including who will have access to these interim results and make the final decision to terminate the trial                                                                                                                                                               | __23__    |
| 23 |                                 |     |                                                                                                                                                                                                                                                                                                                                       |           |
| 24 |                                 |     |                                                                                                                                                                                                                                                                                                                                       |           |
| 25 | Harms                           | 22  | Plans for collecting, assessing, reporting, and managing solicited and spontaneously reported adverse events and other unintended effects of trial interventions or trial conduct                                                                                                                                                     | __23__    |
| 26 |                                 |     |                                                                                                                                                                                                                                                                                                                                       |           |
| 27 |                                 |     |                                                                                                                                                                                                                                                                                                                                       |           |
| 28 | Auditing                        | 23  | Frequency and procedures for auditing trial conduct, if any, and whether the process will be independent from investigators and the sponsor                                                                                                                                                                                           | _____     |
| 29 |                                 |     |                                                                                                                                                                                                                                                                                                                                       |           |
| 30 |                                 |     |                                                                                                                                                                                                                                                                                                                                       |           |
| 31 |                                 |     |                                                                                                                                                                                                                                                                                                                                       |           |
| 32 | <b>Ethics and dissemination</b> |     |                                                                                                                                                                                                                                                                                                                                       |           |
| 33 |                                 |     |                                                                                                                                                                                                                                                                                                                                       |           |
| 34 | Research ethics approval        | 24  | Plans for seeking research ethics committee/institutional review board (REC/IRB) approval                                                                                                                                                                                                                                             | __23__    |
| 35 |                                 |     |                                                                                                                                                                                                                                                                                                                                       |           |
| 36 |                                 |     |                                                                                                                                                                                                                                                                                                                                       |           |
| 37 | Protocol amendments             | 25  | Plans for communicating important protocol modifications (eg, changes to eligibility criteria, outcomes, analyses) to relevant parties (eg, investigators, REC/IRBs, trial participants, trial registries, journals, regulators)                                                                                                      | __22__    |
| 38 |                                 |     |                                                                                                                                                                                                                                                                                                                                       |           |
| 39 |                                 |     |                                                                                                                                                                                                                                                                                                                                       |           |
| 40 |                                 |     |                                                                                                                                                                                                                                                                                                                                       |           |
| 41 |                                 |     |                                                                                                                                                                                                                                                                                                                                       |           |
| 42 |                                 |     |                                                                                                                                                                                                                                                                                                                                       |           |
| 43 |                                 |     |                                                                                                                                                                                                                                                                                                                                       |           |
| 44 |                                 |     |                                                                                                                                                                                                                                                                                                                                       |           |
| 45 |                                 |     |                                                                                                                                                                                                                                                                                                                                       |           |
| 46 |                                 |     |                                                                                                                                                                                                                                                                                                                                       |           |
| 47 |                                 |     |                                                                                                                                                                                                                                                                                                                                       |           |



|    |                               |     |                                                                                                                                                                                                                                                                                     |       |
|----|-------------------------------|-----|-------------------------------------------------------------------------------------------------------------------------------------------------------------------------------------------------------------------------------------------------------------------------------------|-------|
| 1  |                               |     |                                                                                                                                                                                                                                                                                     |       |
| 2  |                               |     |                                                                                                                                                                                                                                                                                     |       |
| 3  | Consent or assent             | 26a | Who will obtain informed consent or assent from potential trial participants or authorised surrogates, and how (see Item 32)                                                                                                                                                        | 8-10  |
| 4  |                               |     |                                                                                                                                                                                                                                                                                     |       |
| 5  |                               |     |                                                                                                                                                                                                                                                                                     |       |
| 6  |                               | 26b | Additional consent provisions for collection and use of participant data and biological specimens in ancillary studies, if applicable                                                                                                                                               |       |
| 7  |                               |     |                                                                                                                                                                                                                                                                                     |       |
| 8  |                               |     |                                                                                                                                                                                                                                                                                     |       |
| 9  | Confidentiality               | 27  | How personal information about potential and enrolled participants will be collected, shared, and maintained in order to protect confidentiality before, during, and after the trial                                                                                                |       |
| 10 |                               |     |                                                                                                                                                                                                                                                                                     |       |
| 11 |                               |     |                                                                                                                                                                                                                                                                                     |       |
| 12 | Declaration of interests      | 28  | Financial and other competing interests for principal investigators for the overall trial and each study site                                                                                                                                                                       | 24    |
| 13 |                               |     |                                                                                                                                                                                                                                                                                     |       |
| 14 |                               |     |                                                                                                                                                                                                                                                                                     |       |
| 15 | Access to data                | 29  | Statement of who will have access to the final trial dataset, and disclosure of contractual agreements that limit such access for investigators                                                                                                                                     | 23    |
| 16 |                               |     |                                                                                                                                                                                                                                                                                     |       |
| 17 |                               |     |                                                                                                                                                                                                                                                                                     |       |
| 18 | Ancillary and post-trial care | 30  | Provisions, if any, for ancillary and post-trial care, and for compensation to those who suffer harm from trial participation                                                                                                                                                       |       |
| 19 |                               |     |                                                                                                                                                                                                                                                                                     |       |
| 20 |                               |     |                                                                                                                                                                                                                                                                                     |       |
| 21 | Dissemination policy          | 31a | Plans for investigators and sponsor to communicate trial results to participants, healthcare professionals, the public, and other relevant groups (eg, via publication, reporting in results databases, or other data sharing arrangements), including any publication restrictions | 23    |
| 22 |                               |     |                                                                                                                                                                                                                                                                                     |       |
| 23 |                               |     |                                                                                                                                                                                                                                                                                     |       |
| 24 |                               |     |                                                                                                                                                                                                                                                                                     |       |
| 25 |                               | 31b | Authorship eligibility guidelines and any intended use of professional writers                                                                                                                                                                                                      | 24,25 |
| 26 |                               |     |                                                                                                                                                                                                                                                                                     |       |
| 27 |                               | 31c | Plans, if any, for granting public access to the full protocol, participant-level dataset, and statistical code                                                                                                                                                                     |       |
| 28 |                               |     |                                                                                                                                                                                                                                                                                     |       |
| 29 | <b>Appendices</b>             |     |                                                                                                                                                                                                                                                                                     |       |
| 30 |                               |     |                                                                                                                                                                                                                                                                                     |       |
| 31 | Informed consent materials    | 32  | Model consent form and other related documentation given to participants and authorised surrogates                                                                                                                                                                                  |       |
| 32 |                               |     |                                                                                                                                                                                                                                                                                     |       |
| 33 |                               |     |                                                                                                                                                                                                                                                                                     |       |
| 34 | Biological specimens          | 33  | Plans for collection, laboratory evaluation, and storage of biological specimens for genetic or molecular analysis in the current trial and for future use in ancillary studies, if applicable                                                                                      |       |
| 35 |                               |     |                                                                                                                                                                                                                                                                                     |       |
| 36 |                               |     |                                                                                                                                                                                                                                                                                     |       |

37 \*It is strongly recommended that this checklist be read in conjunction with the SPIRIT 2013 Explanation & Elaboration for important clarification on the items.  
 38 Amendments to the protocol should be tracked and dated. The SPIRIT checklist is copyrighted by the SPIRIT Group under the Creative Commons  
 39 "[Attribution-NonCommercial-NoDerivs 3.0 Unported](https://creativecommons.org/licenses/by-nc-nd/3.0/)" license.  
 40

# BMJ Open

## The JACK Trial Protocol: A Phase III multi-centre cluster randomised controlled trial of a school-based relationship and sexuality education intervention focusing on young male perspectives

|                                 |                                                                                                                                                                                                                                                                                                                                                                                                                                                                                                                                                                                                                                                                                                                                                                                                                                                                                                                                                                                                                                                                                                                    |
|---------------------------------|--------------------------------------------------------------------------------------------------------------------------------------------------------------------------------------------------------------------------------------------------------------------------------------------------------------------------------------------------------------------------------------------------------------------------------------------------------------------------------------------------------------------------------------------------------------------------------------------------------------------------------------------------------------------------------------------------------------------------------------------------------------------------------------------------------------------------------------------------------------------------------------------------------------------------------------------------------------------------------------------------------------------------------------------------------------------------------------------------------------------|
| Journal:                        | <i>BMJ Open</i>                                                                                                                                                                                                                                                                                                                                                                                                                                                                                                                                                                                                                                                                                                                                                                                                                                                                                                                                                                                                                                                                                                    |
| Manuscript ID                   | bmjopen-2018-022128.R1                                                                                                                                                                                                                                                                                                                                                                                                                                                                                                                                                                                                                                                                                                                                                                                                                                                                                                                                                                                                                                                                                             |
| Article Type:                   | Protocol                                                                                                                                                                                                                                                                                                                                                                                                                                                                                                                                                                                                                                                                                                                                                                                                                                                                                                                                                                                                                                                                                                           |
| Date Submitted by the Author:   | 04-Jun-2018                                                                                                                                                                                                                                                                                                                                                                                                                                                                                                                                                                                                                                                                                                                                                                                                                                                                                                                                                                                                                                                                                                        |
| Complete List of Authors:       | Lohan, Maria ; Queens University of Belfast, Aventin, Áine; Queens University of Belfast<br>Clarke, Mike; Queen's University Belfast, Northern Ireland Methodology Hub<br>Curran, Rhonda; Queens University of Belfast<br>Maguire, Lisa; Queens University of Belfast<br>Hunter, Rachael; University College London, Research Dept of Primary Care and Population Health<br>McDowell, Clíona; Northern Ireland Clinical Trials Unit<br>McDaid, Lisa; University of Glasgow, MRC/CSO Social and Public Health Sciences Unit<br>Young, Honor; Cardiff University, Centre for the Development and Evaluation of Complex Interventions<br>White, James; Cardiff University, South East Wales Trials Unit<br>Fletcher, Adam; Cardiff University, School of Social Sciences<br>French, Rebecca ; London School of Hygiene and Tropical Medicine, Social and Environmental Health Research<br>Bonell, Christopher; London School of Hygiene and Tropical Medicine, Public Health and Policy<br>Bailey, Julia; University College London, Primary Care and Population Health<br>O'Hare, Liam; Queens University of Belfast |
| <b>Primary Subject Heading</b>: | Sexual health                                                                                                                                                                                                                                                                                                                                                                                                                                                                                                                                                                                                                                                                                                                                                                                                                                                                                                                                                                                                                                                                                                      |
| Secondary Subject Heading:      | Evidence based practice, Research methods, Sociology, Public health                                                                                                                                                                                                                                                                                                                                                                                                                                                                                                                                                                                                                                                                                                                                                                                                                                                                                                                                                                                                                                                |
| Keywords:                       | PUBLIC HEALTH, Community child health < PAEDIATRICS, SEXUAL MEDICINE, PREVENTIVE MEDICINE                                                                                                                                                                                                                                                                                                                                                                                                                                                                                                                                                                                                                                                                                                                                                                                                                                                                                                                                                                                                                          |
|                                 |                                                                                                                                                                                                                                                                                                                                                                                                                                                                                                                                                                                                                                                                                                                                                                                                                                                                                                                                                                                                                                                                                                                    |

SCHOLARONE™  
Manuscripts

1  
2  
3 **The JACK Trial Protocol: A Phase III multi-centre cluster randomised controlled trial of a school-**  
4 **based relationship and sexuality education intervention focusing on young male perspectives**

5 Maria Lohan,<sup>1</sup> Áine Aventin,<sup>1</sup> Mike Clarke,<sup>2,3</sup> Rhonda M Curran,<sup>1</sup> Lisa Maguire,<sup>1</sup> Rachael Hunter,<sup>4</sup>  
6  
7 Clíona McDowell,<sup>3</sup> Lisa McDaid,<sup>5</sup> Honor Young,<sup>6</sup> James White,<sup>6</sup> Adam Fletcher,<sup>6</sup> Rebecca French,<sup>7</sup>  
8  
9 Christopher Bonell,<sup>7</sup> Julia V Bailey,<sup>7</sup> Liam O'Hare<sup>8</sup>

10  
11  
12  
13  
14 1. School of Nursing and Midwifery, Queen's University Belfast, Belfast, UK

15  
16  
17 2. Centre for Public Health, Queen's University Belfast, Belfast, UK

18  
19  
20 3. Northern Ireland Clinical Trials Unit, Belfast, UK

21  
22  
23 4. Research Department of Primary Care and Population Health, University College London, London,  
24  
25 UK

26  
27  
28 5. MRC/CSO Social & Public Health Sciences Unit, University of Glasgow, Glasgow, UK

29  
30  
31 6. The Centre for the Development and Evaluation of Complex Interventions for Public Health  
32  
33 Improvement (DECIPHer), Cardiff University, Cardiff, UK

34  
35  
36 7. Department of Social and Environmental Health Research, London School of Hygiene and Tropical  
37  
38 Medicine, London, UK

39  
40  
41 8. Centre for Evidence and Social Innovation, Queen's University Belfast, Belfast, UK

42  
43 **Corresponding Author:** Prof Maria Lohan, School of Nursing and Midwifery, Queen's University  
44  
45 Belfast, 97 Lisburn Road, Belfast, BT9 7BL, UK Email: [m.lohan@qub.ac.uk](mailto:m.lohan@qub.ac.uk) Telephone: +44(0) 289  
46  
47 90972839

48  
49  
50 **Word count:** 6471, including funding statement and acknowledgments & excluding title page,  
51  
52 abstract, references, figures and tables

## ABSTRACT

**Introduction** Teenage pregnancy remains a worldwide health concern which is an outcome of, and contributor to, health inequalities. The need for gender-sensitive interventions with a focus on males in addressing teenage pregnancy has been highlighted as a global health need by the World Health Organisation and identified in systematic reviews of relationship and sexuality education (RSE). This study aims to test the effectiveness of an interactive film-based RSE intervention which draws explicit attention to the role of males in preventing an unintended pregnancy by reducing unprotected heterosexual teenage sex among males and females under age 16 years.

**Methods and analysis** A Phase III cluster randomised trial with embedded process and economic evaluations. *If I Were Jack* encompasses a culturally sensitive interactive film, classroom materials, a teacher-trainer session and parent animations, and will be delivered to replace some of the usual RSE for the target age group in schools in the intervention group. Schools in the control group will not receive the intervention and will continue with usual RSE. Participants will not be blinded to allocation. Schools are the unit of randomisation stratified per country and socio-economic status. We aim to recruit 66 UK schools (24 in Northern Ireland; 14 in each of England, Scotland and Wales), including approximately 7900 pupils. A questionnaire will be administered at baseline and at 12-14 months post-intervention. The primary outcome is reported unprotected sex, a surrogate measure associated with unintended teenage pregnancy. Secondary outcomes include knowledge, attitudes, skills and intentions relating to avoiding teenage pregnancy in addition to frequency of engagement in sexual intercourse, contraception use, and diagnosis of sexually transmitted infections.

**Ethics and dissemination** Ethical approval was obtained from Queen's University Belfast. Results will be published in peer-reviewed journals and disseminated to stakeholders. Funding is from the National Institute for Health Research.

**Trial registration** ISRCTN: 99459996; Pre-results

**STRENGTHS AND LIMITATIONS OF THIS STUDY**

- The study is evaluating the first relationship and sexuality education (RSE) intervention to be developed and trialled which explicitly promotes a gender-sensitive approach to addressing teenage pregnancy by focussing on male perspectives.
- The intervention is culturally sensitive to different parts of the UK, non-directive in terms of pregnancy resolution options and sufficiently flexible to allow use within schools which vary in their personal development/RSE policy, including in faith-based schools.
- It is the first RSE Intervention to be developed and trialled across all four nations of the UK, allowing for exploration of what works best where.
- Due to the nature of the intervention and setting – within schools – participating teachers, pupils and parents cannot be blinded to allocation.
- A biological measure of adolescent conception rates was not possible and hence we rely on a surrogate measure of incidence of unprotected sex.

## INTRODUCTION

Teenage pregnancy remains a worldwide health concern and is both an outcome of, and contributor to, inequalities in health.[1] The UK has the highest rate of teenage pregnancy in Western Europe.[2] While conception rates for girls aged under 18 have halved since 1998 in England and Wales, and now stand at 21.0 per 1000 population,[3] it remains that just over 20,000 teenage women under 18 became pregnant in England and Wales in 2015 and approximately half of these ended in legal abortion.[3] The conception rate for Scotland was 32.4 per 1000 in 2015.[4] In Northern Ireland (NI), abortion is illegal and is only considered lawful in exceptional circumstances where the life of the pregnant woman is at immediate risk or if there is a risk of serious injury to her physical or mental health. Reflecting this different legal framework, government targets around reducing teenage pregnancies in NI relate to births and not conceptions. In NI, the birth rate for teenage mothers per 1000 young women aged 13-19 years was 11.3 in 2013.[5] In the same year, the teenage birth rate in the most deprived areas was 23.0 per 1000, nearly six times that of the least deprived areas in NI (3.9 per 1000).[6]

Although the life course for teenage parents is not universally negative,[7] the social disadvantage and exclusion that are linked to teenage pregnancy are considered problematic.[1] Unintended teenage pregnancy can lead to considerable adverse health problems for teenagers and their infants as well as generating emotional, social and economic costs for them, their families and society.[8, 9] While unintended teenage pregnancy is a complex phenomenon that cannot be prevented through Relationship and Sexuality Education (RSE) alone,[10–16] high quality RSE is an essential component in the process of reducing unintended pregnancy rates, as well as being a vital aspect of improving holistic sexual health and wellbeing.[17–21] The UK governments all emphasise the policy importance of decreasing under-18 conception rates and increasing sexual health precaution behaviours in teenagers via the implementation of RSE in schools as a key objective in their current sexual health policies.[22–24]

1  
2  
3 Several systematic reviews have identified the characteristics of effective RSE programmes which  
4 help increase their impact on sexual risk-taking behaviours.[25-31] These include: the use of  
5 theoretically-based interventions targeting sexual and psycho-social mediating variables such as  
6 knowledge, attitudes, self-efficacy, intentions, perceptions of risk, and perceptions of peer norms  
7 which are linked to sexual behaviour change; the use of culturally-sensitive and gender-specific  
8 interventions; the use of interactive modalities which promote personal identification with the  
9 educational issues and engagement of young people; the use of skills-building components; the  
10 involvement of parents in the RSE process; and facilitating linkages with support services. However,  
11 teenage boys have usually been neglected in relation to RSE, particularly with respect to teenage  
12 pregnancy.[18, 32–36] The lack of gender-sensitive interventions which acknowledge the potential  
13 influence of gender in successfully engaging both males and females in addressing teenage  
14 pregnancy has been highlighted as a global health need by the World Health Organisation (WHO)[37-  
15 39] and identified in systematic reviews of RSE.[15, 35, 40-41]

16  
17  
18  
19  
20  
21  
22  
23  
24  
25  
26  
27  
28  
29  
30  
31 The *If I were Jack* teacher-led classroom-based RSE intervention represents an innovative  
32 combination of the effective characteristics identified in the above mentioned systematic reviews. It  
33 is aimed at both teenage boys and girls but with explicit attention drawn to the role of teenage boys  
34 in preventing an unintended teenage pregnancy. A specific aim of *If I Were Jack* is to encourage  
35 scrutiny of the gender norms which typically situate the issue of a teenage pregnancy as a woman's  
36 problem, by placing emphasis on the teenage male perspective whilst not excluding the teenage  
37 female perspective. The *If I Were Jack* intervention is predicted to decrease young people's sexual  
38 risk-taking behaviour in relation to avoiding teenage pregnancy and to promote positive sexual  
39 health.  
40  
41  
42  
43  
44  
45  
46  
47  
48  
49

50 We aim to evaluate the effectiveness and cost effectiveness of the *If I Were Jack* RSE intervention in  
51 reducing rates of unprotected sex among teenagers under 16 years of age and to better understand  
52 the contextual conditions through a process evaluation. The intervention will be delivered to replace  
53  
54  
55  
56  
57  
58  
59  
60

1  
2  
3 some of usual RSE in the intervention group. Schools in the control group will not receive the  
4 intervention and will continue to deliver RSE according to their current and existing practices,  
5 including meeting their statutory curriculum requirements. This is a pragmatic comparator reflecting  
6 typical routine practice, which allows for comparison of the intervention with the existing RSE  
7 experience.  
8  
9  
10  
11  
12

## 13 14 15 16 **METHODS AND ANALYSIS**

### 17 18 19 **Trial design**

20  
21  
22 The JACK trial is a Phase III multi-centre, parallel-group cluster randomised trial (cRCT) (Figure 1).  
23 Schools are the unit of randomisation with a 1:1 allocation. The study design has an embedded  
24 process evaluation and economic evaluation. The trial design follows the Medical Research Council's  
25 Framework for Developing and Evaluating Complex Interventions.[42]  
26  
27  
28  
29

### 30 31 **Study setting**

32  
33  
34 The trial will take place in 66 secondary level schools in the UK (24 in Northern Ireland and 14 each in  
35 England, Scotland and Wales). The whole of NI is included but, for reasons of practicality,  
36 convenience and cost, representative geographical restrictions will be in place in England (Greater  
37 London area), Scotland (mainland Scotland) and Wales (South Wales). The intervention will be  
38 delivered by teachers, as part of the Key Stage 4 Personal and Health Education curriculum (NI,  
39 England and Wales) and in Scotland as part of the Curriculum for Excellence Relationships, Sexual  
40 Health and Parenthood education.  
41  
42  
43  
44  
45  
46  
47  
48

### 49 50 **Public Involvement**

51  
52 Public involvement in the design of the If I were Jack intervention has been facilitated by a Young  
53 People's Advisory Group (YPAG) composed of members from each of the four nations of the UK. The  
54 group of twenty 14-16 year olds and their designated youth workers was brought together for a  
55  
56  
57  
58  
59  
60



1  
2  
3 facilitated discussion about the intervention during one weekend in Cardiff in April 2017. The group  
4  
5 contributed especially to production decisions for the interactive video drama. This YPAG also read  
6  
7 and commented on the questionnaire and pupil information sheet remotely. In the earlier feasibility  
8  
9 trial, we had consulted extensively with pupils about the questionnaire.[43] The intervention and  
10  
11 trial design has also been informed by a Trial Stakeholders Group. This group is composed of  
12  
13 relationship and sexuality education experts and teachers and senior representatives from key  
14  
15 statutory organisations and government departments from all four nations of the UK. Finally, the  
16  
17 trial design has been informed by a Trial Steering Group, composed of methodological experts,  
18  
19 pupils, teachers and school principals/head teachers. All three groups will continue to advise the  
20  
21 research team throughout the trial. Dissemination to schools will first involve discussion with  
22  
23 Schools and our YPAG involving regular updates and final reports. Our research team across the four  
24  
25 nations will disseminate at talks aimed at the public and policy-makers in all four jurisdictions and a  
26  
27 lay summary will be made available on our Jack Trial website [http://www.qub.ac.uk/sites/if-i-were-](http://www.qub.ac.uk/sites/if-i-were-jack/)  
28  
29 [jack/](http://www.qub.ac.uk/sites/if-i-were-jack/)  
30  
31

## 32 33 **Eligibility**

### 34 35 Eligibility criteria for clusters

36  
37  
38 All state secondary-level schools in the 2018/2019 academic year will be included with the exception  
39  
40 of independent private, special and Irish/Welsh-medium and Scottish Gaelic schools (but not  
41  
42 excluding schools that have an embedded Irish/Welsh-medium component). Schools with less than  
43  
44 30 pupils in the target year group (Year 11 in NI, S3 in Scotland and Year 10 in England and Wales)  
45  
46 will be excluded. Schools that have already participated in the feasibility ( $n=8$  in NI), [43]  
47  
48 transferability (England  $n=3$ , Scotland  $n=3$  and Wales  $n=3$ ) and pilot studies (England  $n=1$ , Scotland  
49  
50  $n=1$  and Wales  $n=1$ ) involving the *If I Were Jack* intervention in preparation of this for phase III study  
51  
52 will also be excluded.  
53  
54

### 55 56 Eligibility criteria for participants

  
57  
58  
59  
60

1  
2  
3 Eligible teachers are those who will be responsible for the delivery of RSE to pupils in Year 11 in NI,  
4 S3 in Scotland and Year 10 in England and Wales during the 2018/2019 academic year.  
5  
6

7 Eligible pupils are the 2018/2019 academic year pupil cohort (all classes within) in Year 11 in NI, S3 in  
8 Scotland and Year 10 in England and Wales (mean age 14). This year group has been selected for a  
9 number of reasons. First, proximal risk factors of teenage pregnancy begin manifesting in this age  
10 group,[14, 44] making it an appropriate time for preventative sex education that is considered  
11 acceptable in society and education.[14, 27, 45] Second, there is an identified deficit in resources for  
12 this age group in relation to teenage pregnancy,[46-47] and third, findings from the JACK feasibility  
13 study[43] indicated that there is a greater opportunity for implementation of the intervention during  
14 a year where there are no statutory examinations. Finally, this population has been chosen to  
15 facilitate a 12-14 month follow-up of pupils (post-intervention) before some pupils exit formal  
16 education following their first major statutory exams or reaching the age of 16 years.  
17  
18  
19  
20  
21  
22  
23  
24  
25  
26  
27

### 28 29 **Sample size**

30  
31  
32 The sample size calculation is based on UK-wide data[48-49] demonstrating that between 25% and  
33 33% of 15 year olds are having sex and the proportion of 15 year olds reporting unprotected sex is  
34 2.8% (overall in NI, England, Scotland and Wales). The study will be powered to detect a 50%  
35 reduction in the incidence of unprotected sex (from expected rate of 2.8% to 1.4%) by 15 years of  
36 age. Such a difference of 1.4% in unprotected sex has been shown to have a meaningful impact on  
37 pregnancy rates.[14, 50-52] The between-group difference in the incidence of unprotected sex of  
38 1.3% (95% CI 0.5 to 2.2%) by nine months in our feasibility trial[43] demonstrates that such an effect  
39 size is plausible and is consistent with effect sizes seen in the literature.[50] The study will take  
40 account of clustering. In the feasibility data, the intraclass correlation coefficient (ICC) was 0.01.[43]  
41  
42 As pilot studies can provide imprecise estimates of ICCs,[53] we re-estimated using ICCs from three  
43 sources, the RIPPLE cRCT,[52] a 2013/2014 WHO Health Behaviour in School-aged Children survey  
44 [48] and a 2013 Young Persons' Behaviour and Attitudes Survey in NI conducted by the Northern  
45  
46  
47  
48  
49  
50  
51  
52  
53  
54  
55  
56  
57  
58  
59  
60

1  
2  
3 Ireland Statistics & Research Agency (NISRA).[49] The data from the WHO and NISRA studies were  
4  
5 combined. The RIPPLE and combined WHO and NISRA studies found an ICC of 0.004. Assuming 120  
6  
7 students per school, an ICC of 0.01 and 7% attrition (plus two additional schools to be conservative),  
8  
9 a trial involving 33 schools per group will provide 80% power at a 5% significance level (a pupil  
10  
11 participant sample size of n=7904, with n=224 reporting unprotected sex). The power would rise to  
12  
13 93% if the ICC is 0.004.  
14  
15

## 16 **Recruitment and retention**

### 17 Recruitment of schools

18  
19 In each country, eligible schools will be stratified based on the percentage of students eligible for  
20  
21 free school meals (%FSM) for the 2018/2019 academic year (schools above and below the median  
22  
23 national percentage free school meals) as a proxy for the level of deprivation. In NI, 14 schools will  
24  
25 be randomly selected from the above-median stratum and 10 from the below-median stratum (total  
26  
27 24). In England, Scotland and Wales, eight schools will be randomly selected from the above-median  
28  
29 stratum and six from the below-median stratum (to give a total of 14). The decision to select slightly  
30  
31 more schools from the above-median %FSM reflects research which indicates that teenage  
32  
33 pregnancy and unprotected sex is more acute in more deprived areas.[1, 48]  
34  
35  
36  
37  
38

39 The school recruitment period will run from February to June 2018. The school recruitment strategy  
40  
41 is represented in Figure 2. In Scotland, it is required that permission is given from each local  
42  
43 authority (typically by approaching the Director of Education) prior to commencing recruitment. Any  
44  
45 schools that decline to participate will be replaced by a randomly selected school in the same  
46  
47 stratum.  
48  
49

### 50 Recruitment of teachers

51  
52  
53 Based on our recruitment procedures in the feasibility study,[54] once a school has made a decision  
54  
55 to participate, a member of the research team will meet with teachers (identified by a school-  
56  
57  
58  
59  
60

1  
2  
3 assigned 'Trial Champion') responsible for the delivery of RSE to the target pupil year groups during  
4 the 2018/2019 academic year, to deliver an information session and answer any outstanding  
5 enquiries. Teachers will be provided with a copy of the school letter, information sheet,  
6 memorandum of understanding and consent form.  
7  
8  
9

#### 10 11 Recruitment of pupils

12  
13  
14 When a school and the relevant teachers who will be delivering the intervention to pupils have  
15 provided consent, the first step taken towards pupil recruitment is to inform parents/guardians.  
16  
17 Schools (with the assistance of the school administrator) will be asked to post a hard copy of the  
18 parents'/guardians' information sheet and an opt-out consent form with pre-paid response  
19 envelopes. Schools will be responsible for addressing and preparing envelopes for postage.  
20  
21 Parents/guardians will be advised within the material provided that they have to return the opt-out  
22 consent forms by a date no later than three weeks prior to commencement of baseline data  
23 collection within the school. The trial co-ordinator will collate a list of parents/guardians who have  
24 opted their child out of participation and return this to participating teachers.  
25  
26  
27  
28  
29  
30  
31  
32  
33

34 Schools will be provided with printed copies of the pupil information sheets to be distributed to  
35 eligible pupils at least one week prior to baseline data collection. Only eligible pupils whose  
36 parents/guardians did not opt-out of providing consent for them to participate will be provided with  
37 a copy of the pupil information sheet. Immediately prior to administering the baseline  
38 questionnaire, eligible pupils will attend a short information session, delivered by a member of the  
39 research team, including an information video. Pupils will be given an opportunity to ask questions  
40 prior to deciding whether to participate. A repeat information session and baseline data collection  
41 session will be facilitated in agreement with the school to accommodate any pupils who are absent  
42 from the initial session. In the unlikely event that absenteeism remains in excess of 5-10% in a  
43 school, the research team, in agreement with the school, will return a third time to facilitate an  
44  
45  
46  
47  
48  
49  
50  
51  
52  
53  
54  
55  
56  
57  
58  
59  
60

1  
2  
3 additional information session and baseline data collection. Pupils with mild learning difficulties or  
4  
5 poor English will be supported where possible by fieldworkers to complete the questionnaires.  
6

#### 7 Retention

8  
9  
10 To promote school, teacher and pupil retention and complete follow-up, schools will be provided  
11  
12 with £1000 upon completion of baseline and follow up measures. Trial co-ordinators will be  
13  
14 proactive in resolving any issues that arise with schools. Periodic communications will be provided  
15  
16 by trial co-ordinators to inform schools, staff, pupils and parents (depending on preferences of  
17  
18 schools) of the current status of the study, and plans for the next phase, as well as to acknowledge  
19  
20 their support.  
21

#### 22 23 **Randomisation**

24  
25  
26 Following baseline data collection, randomisation will be carried out by the NI Clinical Trials Unit  
27  
28 (NICTU, a UK Clinical Research Collaboration registered CTU), who will produce eight randomisation  
29  
30 schedules (using unique identifiers for schools), one for each %FSM stratum within each country,  
31  
32 using random permuted blocks of mixed size, generated using nQuery Advisor 7.0. The NICTU are  
33  
34 not involved with recruitment and will only release the randomisation code (in sealed envelopes)  
35  
36 when all schools have been recruited and baseline data collection completed, therefore allocation  
37  
38 concealment will be ensured.  
39

#### 40 41 **Intervention**

42  
43  
44 The intervention will be described in accordance with the Template for Intervention Description and  
45  
46 Replication (TIDieR) guidelines.[55]  
47

48  
49 *Name and brief description: If I Were Jack* is an evidenced-based RSE teacher-delivered intervention  
50  
51 designed to prevent unintended pregnancy and promote positive sexual health by increasing  
52  
53 teenagers' intentions to avoid teenage pregnancy through delaying sexual intercourse or using  
54  
55 contraception consistently. It is especially designed to engage with males but can be delivered to  
56  
57

both male and female pupils. The underpinning theoretical framework for this intervention combines the well-established Theory of Planned Behaviour [56] and critiques to this theory [57] which focus on the inclusion of an understanding of the broader socio-environmental factors (such as socio-economic status; SES) and underlying values (such as religiosity and gender ideologies) associated with the occurrence of teenage pregnancy.[14, 58-59] The *If I Were Jack* Theory of Change Logic Model is depicted in Figure 3.

*Why, rationale of essential elements: If I Were Jack* targets six psycho-social mechanisms which research indicates are related to a reduction in risk-taking behaviour: knowledge, communication skills, attitudes, social influences, beliefs about capabilities, and intentions (Table 1).[15, 60, 61]

**Table 1:** Psychosocial and behavioural components of the *If I Were Jack* intervention

| Component            | Aim                                                                                                                                                                                                                                                                                                                                                                                                                                                                                                                       |
|----------------------|---------------------------------------------------------------------------------------------------------------------------------------------------------------------------------------------------------------------------------------------------------------------------------------------------------------------------------------------------------------------------------------------------------------------------------------------------------------------------------------------------------------------------|
| Knowledge            | Increase knowledge of: ways of avoiding unintended pregnancy; roles and responsibilities of young men in relation to unintended pregnancy; possible negative relational, social, emotional and financial consequences of unintended pregnancy; and sources of information and support for unintended pregnancy and sexual health more broadly                                                                                                                                                                             |
| Communication skills | Increase skills in communicating with parents, peers and sexual partners about avoiding unintended pregnancy                                                                                                                                                                                                                                                                                                                                                                                                              |
| Attitudes            | Increase anticipated regret about the consequences of unintended pregnancy on current and future goals                                                                                                                                                                                                                                                                                                                                                                                                                    |
| Social influences    | Increase awareness of peer norms, stereotypical gender norms and parental attitudes and beliefs about teenage pregnancy<br>Gender norms: increase perception that both men and women have roles and responsibilities in avoiding and dealing with the consequences of unintended pregnancy<br>Peer norms: increase perception that most peers are not sexually active and use contraception when they are<br>Parental values and beliefs: increase awareness of parental attitudes and beliefs about unintended pregnancy |

|                            |                                                                                                                                                                                                                                                    |
|----------------------------|----------------------------------------------------------------------------------------------------------------------------------------------------------------------------------------------------------------------------------------------------|
| Beliefs about capabilities | Increase perceived behavioural control to avoid unintended pregnancy (say no to sex or obtain and use contraception correctly) and increase self-efficacy to communicate about avoiding unintended pregnancy with parents, peers and professionals |
| Intentions                 | Increase strength of intention to avoid unplanned teenage pregnancy                                                                                                                                                                                |

The intervention components provide pupils with educational information and opportunities for discussion, skills practice, reflection and anticipatory thinking and are designed to specifically target one or more of the above psycho-social mechanisms.[62] The intervention components also include explicit reference to the impact of SES, religion and gender norms on sexual behaviour, inviting participants to think through how underlying social influences, such as social class and gender norms of sexual behaviour, can be challenged through individual agency. A feasibility trial demonstrated the acceptability to teachers and pupils and feasibility of implementation across a wide range of schools in Northern Ireland.[43]

*What, a description of the materials:* The *If I Were Jack* intervention consists of the following elements:

- A culturally sensitive interactive video drama (IVD) intended to immerse teenagers in a story of a week in the life of Jack, a teenager who has just been told by his girlfriend that she is pregnant. By asking males and females to imagine they were Jack and how they would think and feel if they were in his situation, it is designed to expose and challenge the gender assumptions around roles and responsibilities for teenage pregnancy by opening them up for reflection and negotiation. Informed by the findings of a prior transferability study that followed the feasibility trial of the intervention,[45] two versions of the IVD have been made available: one for use in England and Wales, using actors with English accents and one for use in NI and Scotland, using actors with NI accents. The IVD is designed to be delivered on individual computers/tablets with the use of headphones.

- Classroom materials for teachers containing detailed lesson plans with specific classroom-based and homework activities designed to build pupils' skills to a) obtain relevant sexual health information and b) develop communication skills with peers and trusted adults.
- A standardised 60-minute training session for RSE teachers implementing the intervention. The training session will adhere to a pre-defined teacher-trainer protocol and will be delivered in schools by country-specific established statutory and non-statutory RSE coordinators who normally provide RSE teacher training in schools.
- Two short animated films to engage parents/guardians and help/encourage them to have a conversation with their teenager about avoiding unintended pregnancy. A link to the web-hosted films will be texted and/or emailed via a school administrator to all parents/guardians of participating pupils in intervention schools (with one additional reminder text/email).
- A dedicated website ([www.qub.ac.uk/IfIWereJack](http://www.qub.ac.uk/IfIWereJack)) for the intervention, will act as a portal of dissemination, providing password protected access to the intervention materials that teacher-trainers, teachers, parents, and pupils can access.

*Who delivers the intervention?* It is designed to be delivered by trained RSE teachers.

*How, modes of delivery:* *If I Were Jack* can be delivered either over four 50-60 minute lessons or over six 35-45 minute lessons and consists of a combination of classroom-based activities (mainly group discussion) having first viewed the IVD, in addition to pupils being asked to engage in two homework activities (one of which involves discussion with parents/guardians). Adherence to the intervention protocol will be determined as part of our process evaluation.

*Where, locations where intervention has occurred:* The intervention has been delivered in NI[43] and Ireland, using a further locally produced IVD for Ireland. A version of the intervention, the IVD only, has been delivered in schools in South Australia.

## **Outcomes**



### Primary outcome

In this trial, a reduction in unintended teenage pregnancy rates would be the ideal primary outcome measure, but the sample size would need to be very large to detect change in unintended pregnancy rates. We will therefore use a surrogate measure associated with unintended teenage pregnancy: unprotected sex at last sexual encounter, as defined by sexual intercourse without use of contraception (barrier or hormonal). Unprotected sex during teenage years is well established as the main proximate behavioural determinant of teenage pregnancy and is a commonly measured behavioural outcome in studies examining the impact of RSE interventions on teenage pregnancy.[10, 12, 14, 50, 63, 64, 65] Studies indicate that, although other behavioural determinants (such as frequency of sexual intercourse and number of sexual partners) are important, avoidance of unprotected sex via consistent use of contraception is central in explaining variation in levels of teenage pregnancy.[18, 51] The primary outcome will be based on contraception use at last sexual intercourse of unprotected sex at follow-up (i.e. answers to the question “Did you use any form of contraception the last time you had sex?”), consistent with the data on which the sample size calculation was based.[48] An additional item will also be included related to lifetime incidence of unprotected sex in order to account for sporadic use of contraception that may not be reflected in the last sexual encounter. Participants reporting the use of natural family planning or withdrawal methods will be categorised as having engaged in unprotected sex due to the reduced efficacy of these methods in preventing pregnancy and transmission of sexually transmitted infections (STIs). This study will not undertake any data linkage with Health and Social Care or National Health Service records, given that data on conception rates are not available in NI and that data for sexual health related services in England are not readily available as part of routinely collected data given patient privacy requirements.

### Secondary outcomes

1  
2  
3 Secondary outcomes are 12-month impacts on knowledge, attitudes, skills and intentions to  
4 avoiding teenage pregnancy. Secondary outcomes informed by our theory of change (see Figure 3)  
5 include knowledge, attitudes, communication skills and intentions relating to avoiding teenage  
6 pregnancy at follow-up and are hypothesized to lead to increased intention to avoid unprotected  
7 sex. Data will be collected using a number of standardized measures, including comfort  
8 communicating about pregnancy and comfort communicating about contraception derived from  
9 mathtech behaviour inventory;<sup>[65]</sup> the male role attitudes scale;<sup>[66]</sup> sexual socialisation  
10 instrument;<sup>[67]</sup> and sexual self-efficacy scale.<sup>[68]</sup> We will also collect data using an 'Intentions to  
11 avoid a teenage pregnancy scale', developed and psychometrically tested in our feasibility trial.<sup>[43]</sup>  
12 The measures were selected because the constructs they measure map closely to the theoretical  
13 framework underpinning the intervention and the reliability and completion rates of the measures  
14 were satisfactory in the feasibility trial.<sup>[43]</sup> In addition, to assist with the economic evaluation,  
15 supplementary secondary outcomes include: frequency of engagement in sexual intercourse,  
16 contraception use, diagnosis of STIs and incidence of pregnancy and pregnancy outcomes. The  
17 collection of this data was also shown to be feasible in the feasibility trial. Finally, we will collect  
18 important individual level demographic and socio-economic characteristics of the sample to deepen  
19 understandings of how these factors moderate effectiveness.

### 39 **Data collection**

40  
41  
42 Participating pupils will be in the study for approximately 18 months and asked to complete a paper-  
43 based questionnaire during one RSE lesson at baseline and again between 12 and 14 months later. A  
44 fieldworker will administer questionnaires to pupils, under exam conditions, two weeks prior to  
45 commencement of intervention delivery. Informed by the process evaluation conducted in the  
46 feasibility study,<sup>[43]</sup> teachers will be asked to stay at the front of the classroom to maintain order  
47 while alleviating any concerns that teachers may be able to see pupils' answers. Additional  
48  
49  
50  
51  
52  
53  
54  
55  
56  
57  
58  
59  
60

1  
2  
3 fieldworkers will be available to provide support to pupils who require extra help and to ensure  
4  
5 questionnaires are completed confidentially.  
6

7 *Primary outcome*  
8

9  
10 **Process evaluation**  
11

12  
13 Informed by realist approaches to the evaluation of interventions,[42, 69, 70] the process evaluation  
14  
15 has four aims. First, we will examine reasons for school participation and non-participation to inform  
16  
17 risk of bias in the trial as well as longer term sustainability of implementation of the intervention.  
18  
19 Second, we will examine intervention delivery and fidelity in the context of overall RSE provision in  
20  
21 intervention schools. Third, we will assess provision in control schools and potential contamination  
22  
23 caused by any changes to provision that could be due to participation in the trial. Fourth, we will  
24  
25 explore self-reported perceptions of effectiveness and moderating influences in intervention schools  
26  
27 among a sample of pupils, teachers and school principals and parents. Triangulated data collection  
28  
29 methods will include semi-structured interviews with teachers, focus group discussions with pupils,  
30  
31 observations of a sample of lessons and a survey of parents/guardians with follow-up focus groups.  
32  
33 For detail on our approach to integration of the process evaluation with the experimental design  
34  
35 methodology to achieve research objectives, see Figure 4.  
36  
37

38  
39 All schools  
40

41  
42 The school-assigned trial champion or a suitable person identified by the trial champion will  
43  
44 complete a school background questionnaire, designed to detail more general information pertinent  
45  
46 to trial implementation i.e. school experience of teenage pregnancy, school holidays/closures,  
47  
48 school experience of pupils/parents or guardians who do not speak English as a first language or who  
49  
50 do not understand English at all, and school involvement in other research. An appropriate member  
51  
52 of staff identified by the school-assigned trial champion will also complete a questionnaire about  
53  
54 current RSE provision in the school to gain a better understanding of the nature, quantity and quality  
55  
56  
57  
58  
59  
60

1  
2  
3 of RSE currently taught within the school as well as the facilitators and barriers to current RSE  
4  
5 provision within the school. A school administrator will be asked to fill out a school administrator  
6  
7 resource use record detailing associated costs (i.e. postage of parent/guardian information) and time  
8  
9 spent. Schools will be reimbursed up to the value of £100 for these costs.  
10

#### 11 Intervention schools

12  
13  
14 Parent/guardian online survey: Parents/guardians will have been made aware when they were in  
15  
16 receipt of the parents'/guardians' information sheet that there would be an opportunity for them to  
17  
18 respond to a short online parent/guardian survey. Eligible parents/guardians (who have not opted  
19  
20 out of providing consent for their child to participate) will receive the link to this survey (hosted  
21  
22 using the SurveyMonkey® UK platform) in an email and/or text message issued by the school  
23  
24 administrator inviting them to participate (post intervention delivery). The survey will ask  
25  
26 parents/guardians about their engagement with and opinion of the parent/guardian animations and  
27  
28 homework session and whether their child has discussed with them their experience of engaging  
29  
30 with *If I Were Jack*. The questionnaire will be translated where possible and where necessary.  
31  
32  
33

34 Teacher implementation log: Teachers responsible for delivering the intervention will be asked to  
35  
36 complete an implementation log to detail what activities were completed or not completed during  
37  
38 each lesson, and perception of pupil engagement with each activity.  
39  
40

41 Telephone interviews: 15-30 minute telephone interviews will be conducted by trial co-ordinators  
42  
43 with school principals or trial champions in intervention schools that are not 'case study schools'  
44  
45 (see below) to determine any barriers or facilitators of engagement with the intervention.  
46  
47

#### 48 Case study schools

49  
50  
51 Participating intervention schools will be randomly rank ordered in each country and two case study  
52  
53 schools from each country will be randomly selected by NICTU to participate in the process  
54  
55 evaluation. Should a school refuse participation, a further random selection will be made.  
56  
57  
58  
59  
60

1  
2  
3 Observations: Country-specific trial co-ordinators will conduct structured observations of one  
4 randomly selected lesson in every class group in receipt of the intervention in the eight case study  
5 schools. Observations will be focused primarily on measuring teacher fidelity to implementation  
6 protocol and pupil engagement.  
7  
8  
9

10  
11 Focus groups: Trial co-ordinators will conduct three 60-minute focus group discussions in each of the  
12 eight case study schools. One group will be composed of all teachers who delivered the intervention.  
13  
14 The second group will include a maximum of six English-speaking pupils who received the  
15 intervention. Teachers who delivered the intervention will ask for a mixture of male and female  
16 pupil volunteers and pass details of those pupils to the trial co-ordinator. In the event that more  
17 pupils volunteer than are needed (per school), a random selection will be made. The third group will  
18 be a maximum of six English-speaking parents/guardians (of children who received the intervention).  
19  
20 Discussions will focus on perceived barriers and facilitators of successful implementation and  
21 engagement with different components of the intervention.  
22  
23  
24  
25  
26  
27  
28  
29

### 30 31 Fieldworkers

32  
33  
34 Fieldworkers will complete a fieldworker perception form after each visit to a school, asking them to  
35 detail what worked well and what did not in relation to data collection and any other relevant  
36 observations they may have.  
37  
38  
39

### 40 41 Education/policy specialists

42  
43  
44 Trial co-ordinators will conduct telephone or face-to-face interviews with one or two  
45 education/policy specialists in each country. Interviews will focus on the current context of RSE  
46 policy and perceptions of how this might influence the uptake of the *If I Were Jack* intervention.  
47  
48  
49

### 50 51 **Economic evaluation**

52  
53 The economic evaluation will aim to describe the costs and consequences of implementing *If I Were*  
54 *Jack* in UK schools so as to provide information to decision makers on the implications of potential  
55  
56  
57

1  
2  
3 further roll-out of the intervention. This will include the duration of time taken up by *If I Were Jack* in  
4 school from the perspective of the teacher and impact on time spent on other important curricula  
5 activities compared to time spent on standard RSE. The aim of this will be to provide a measure of  
6 the opportunity cost to schools of implementing *If I Were Jack* compared to current RSE. The  
7 structure of the evaluation will follow NICE guidance for evaluating public health interventions [71]  
8 and recent guidance published by Edwards et al [72] on economic evaluations in public health. Costs  
9 will include the cost of implementing the intervention in schools including any training involved and  
10 the cost of current RSE in the control schools. We will also collect information on healthcare cost  
11 information in the intervention and control arms including the costs of sexual health related primary  
12 care attendances, costs associated with STIs and unintended pregnancies (although numbers of  
13 these are likely to be small). The cost of adapting *If I Were Jack* to different groups will also be  
14 reported given that others may want to adapt the intervention before rolling it out. Mean cost per  
15 pupil will be reported alongside consequences including use of contraception, STIs and unintended  
16 pregnancies collected using questionnaires administered to pupils at baseline and follow-up.  
17 Although 12-14 month recall time is a relatively long time-period, pupils are likely to be able to recall  
18 high impact events that occurred during this period. The follow-up time is also important to fit  
19 within the school year timetable. Costs will also be reported by country, given the different sexual  
20 health services provided and hence differential implications for health service costs by country.

21  
22 Given that STIs and unintended pregnancies are likely to be rare but potentially high impact events  
23 in this population group, the long-term costs and consequences will be modelled as part of the cost-  
24 effectiveness decision model (Figure 5), incorporating theories of behaviour change and identified as  
25 applicable for use in this trial during the feasibility trial.[45] In addition to collecting information as  
26 part of the trial, we will look to systematic reviews of evidence of the impact of digital interventions  
27 on sexual health behaviour in this population group, for example the review recently undertaken  
28 and published by Bailey et al.[73] We will undertake one way, two way and probabilistic sensitivity  
29 analyses of the results. Cost effectiveness acceptability curves and cost-effectiveness planes will be

1  
2  
3 reported. The model will have a 20-year time horizon and discounting of future costs and benefits  
4  
5 will comply with NICE guidance for evaluating public health interventions.[71]  
6

## 7 **Statistical Methods**

8  
9  
10 The reporting and presentation of findings will be in accordance with the CONSORT guidelines for  
11  
12 cRCTs.[74] All analyses will take account of clustering by school using robust standard errors, and  
13  
14 intervention and control groups will be compared at baseline via frequencies/descriptive statistics  
15  
16 (percentage, mean or median as appropriate) in relation to sex, ethnicity, SES at school level (using  
17  
18 percentage free school meals and post-code data) and at individual level (using highest education  
19  
20 qualifications of parents), primary and secondary outcomes.  
21

22  
23  
24 Primary analysis (12-14 month follow-up): The primary effectiveness analysis will be on an intention  
25  
26 to treat basis, using a multi-level logistic regression model (two levels: pupils nested within schools)  
27  
28 adjusting for the baseline outcome and stratification variables.[75] Sensitivity analyses, making  
29  
30 different assumptions on the best and worst case scenarios, as well as imputation models of  
31  
32 missingness will be conducted to investigate the potential impact of missing data.  
33

34  
35 Secondary analysis (12-14 month follow-up): Although the trial is not powered to detect the  
36  
37 influence of mediating and moderating variables, we will examine the following outcomes informed  
38  
39 by our theory of change model (see Figure 3): i) interaction terms will be used to investigate possible  
40  
41 differences in the effect of the intervention on the primary outcome by whether pupils at baseline  
42  
43 reported having had unprotected sex or not, country (Wales, England, Scotland, NI), sex, socio-  
44  
45 economic group (see earlier section 5.5) and ethnicity); ii) a mediational analysis, using an analytic  
46  
47 framework recommended for RCTs,[76] will be used to explore whether the effect of the  
48  
49 intervention on the primary outcome is mediated by individual-level sexual health knowledge and  
50  
51 sexual competence, perceived behavioural control, intentions to avoid an unintended pregnancy,  
52  
53 communication with parents, and gender ideologies. In these secondary analyses, p-values will be  
54  
55  
56  
57  
58  
59  
60

1  
2  
3 interpreted with caution due to the low power and number of interactions being tested (e.g. use of  
4 Bonferroni corrected p-values).

#### 5 6 7 8 Process evaluation

9  
10 All data will be transcribed verbatim (in the case of interviews) or written up in detail (in the case of  
11 observational field notes and other secondary source data). These data will be organised using  
12 'NVivo' software and analysed systematically and thematically based on the six steps proposed by  
13 Braun and Clarke[77] to enable identification and analysis of patterns (or 'themes') within the data  
14 by moving iteratively between theoretical understandings and the new data. These inductively and  
15 deductively derived codes will be analysed to form overarching themes emerging from each of the  
16 participant groups outlined above. We will use qualitative software 'NVivo 10' to organise the data,  
17 and we will ensure methodological rigour by establishing credibility, transferability, dependability  
18 and confirmability using techniques suggested by Lincoln and Guba.[78] In addition, following Hyde  
19 et al,[79] specific attention will be given to analysing the group dynamics of the focus groups as part  
20 of the overall interpretive process.  
21  
22  
23  
24  
25  
26  
27  
28  
29  
30  
31  
32

#### 33 34 **DISCUSSION**

35  
36  
37 The strengths of this study include that this is the first RSE intervention to be developed and trialled  
38 which explicitly promotes a gender-sensitive approach to addressing teenage pregnancy by  
39 focussing on male perspectives. The intervention is culturally sensitive to different parts of the UK, is  
40 non-directive in terms of pregnancy resolution options and is sufficiently flexible to be taught within  
41 the framework of a school's ethos and personal development/RSE policy, including in faith-based  
42 schools. This has particular significance in NI, with almost half (46%) of all NI grammar and secondary  
43 schools identifying as a Roman-Catholic school.[80] This is also the first RSE intervention to be  
44 developed and trialled across all four nations of the UK, allowing for exploration of what works best  
45 where. An additional strength of the study is that the embedded process evaluation involves  
46 triangulation of sources including school management, teachers, pupils, parents and RSE statutory  
47  
48  
49  
50  
51  
52  
53  
54  
55  
56  
57



1  
2  
3 and voluntary stakeholders. Study limitations include that the pragmatic setting – within schools –  
4 means that schools and participating teachers, pupils and parents will remain unblinded to the  
5 allocation. Finally, the use of the surrogate measure of unprotected sex rather than a biological  
6 measure (such as conception rates) introduces the possibility that the findings of the trial will be  
7 influenced by self-report bias, but the veracity of this measure is enhanced by privacy,  
8 confidentiality and a control group.  
9  
10  
11  
12  
13  
14  
15

## 16 **ETHICS AND DISSEMINATION**

17  
18 In writing this protocol, we have endeavoured to adhere to the recommendations and guidance  
19 provided in the Consolidated Standards of Reporting Trials (CONSORT) 2010 statement and the  
20 extension for cRCTs,[74, 81] the Standard Protocol Items: Recommendations for Intervention Trials  
21 (SPIRIT) Statement 2013[82, 83] and the Template for Intervention Description and Replication  
22 (TIDieR).[55] When registering the trial, we have provided structured summary information in  
23 accordance with the requirements of the WHO Trial Registration Data Set (Supplementary File  
24 3).[84]  
25  
26  
27  
28  
29  
30  
31  
32  
33

34 Any modifications to the protocol which may impact on the conduct of the study, potential  
35 effectiveness, or impact study participants, including changes of study objectives, study design,  
36 sample size, study procedures or significant administrative aspects will require a formal amendment  
37 to the protocol. Such amendment will be agreed upon by the JACK Trial Steering Committee,  
38 reported to the funder (National Institute of Health Research, NIHR) and approved by the ethics  
39 committee prior to implementation. Minor administrative changes, corrections or clarifications that  
40 have no effect on the way the study is to be conducted will be agreed upon by the JACK Trial  
41 Steering Committee, documented and reported to the NIHR. The ethics committee may be notified  
42 of such changes at the discretion of the JACK Trial Steering Committee.  
43  
44  
45  
46  
47  
48  
49  
50  
51  
52

53 A full study report will be submitted to the NIHR by the end of December 2020 and made publically  
54 available thereafter in the Public Health Research journal on the NIHR Journals Library. We shall  
55  
56  
57

1  
2  
3 make data available to the scientific community with as few restrictions as feasible, following receipt  
4 of a request to the corresponding author, while retaining exclusive use until the publication of major  
5 outputs via academic conference presentations and journal articles in addition to material created  
6 for relevant stakeholders. Pupil friendly brief reports will be provided to all participating schools.  
7  
8  
9

10  
11 Ethical approval for the JACK Trial was granted by the Research Ethics Committee of the School of  
12 Nursing and Midwifery, Queen's University Belfast in July 2017 (Ref: 11.MLohan.05.17.M6.V1).  
13  
14  
15

### 16 **Safety and data monitoring**

17  
18 This is a low-risk study, therefore, a Data Monitoring Committee is not required and no interim  
19 analysis is planned.  
20  
21  
22  
23

### 24 **ACKNOWLEDGEMENTS**

25  
26 In addition to the authors listed, the JACK Trial study thus far has been dependent on the  
27 commitment provided by extensive public involvement. The intervention has been designed,  
28 developed and piloted in Ireland, NI and South Australia involving over ten years of research with  
29 pupils, teachers, sex education specialists, and education and health promotion departments. These  
30 collaborations have influenced the study by allowing different perspectives to inform the design and  
31 optimal conditions of implementation. We specifically acknowledge the role of the Trial Steering  
32 Committee, comprised of trials experts, a school principal, a school teacher, parent and pupils, who  
33 have provided independent expert advice on the intervention itself as well as refining research  
34 methods for delivery in schools. We also wish to acknowledge our Stakeholders Group, composed of  
35 a UK-wide group of RSE specialists and senior representatives from key statutory organisations and  
36 government departments who have helped to refine the intervention and the study design by  
37 ensuring the research outcomes are important to public concerns and the methods proposed are  
38 acceptable and sensitive to all study participants. We would also like to acknowledge the invaluable  
39 involvement of our Young People's Advisory Groups (one in each country in the UK) who have  
40  
41  
42  
43  
44  
45  
46  
47  
48  
49  
50  
51  
52  
53  
54  
55  
56  
57  
58  
59  
60

1  
2  
3 enabled to us to further refine the intervention in a culturally sensitive way for effectiveness testing  
4  
5 in the whole of the UK. Finally, we thank all schools, teachers, parents and pupils who have  
6  
7 participated in the feasibility, transferability and pilot studies that have preceded this trial.  
8  
9

#### 10 **FUNDING STATEMENT**

11  
12 This research is funded by the National Institute for Health Research (NIHR) Public Health Research  
13  
14 programme, grant number NIHR PHR 15/181/01. LMc is funded by the UK Medical Research Council  
15  
16 (MRC) and Scottish Government Chief Scientist Office (CSO) at the MRC/CSO Social & Public Health  
17  
18 Sciences Unit, University of Glasgow (MC\_UU\_12017/11, SPHSU11). The views expressed are those  
19  
20 of the authors and not necessarily those of the NHS, the NIHR or the Department of Health. This  
21  
22 funding source had no role in the design of this study and will not have any role during its execution,  
23  
24 analyses, interpretation of the data, or decision to submit results.  
25  
26

#### 27 **COMPETING INTERESTS STATEMENT**

28  
29 QUB holds copyright and the researchers do not benefit financially from its evaluation or use. We  
30  
31 report no competing interests or conflicts of interest.  
32  
33  
34

#### 35 **TRIAL STATUS**

36  
37  
38 At the time of submission of this protocol (January 2018) optimisation of the intervention is  
39  
40 underway, but no aspect of the trial has begun yet.  
41  
42

#### 43 **AUTHORS' CONTRIBUTIONS**

44  
45 ML, AA, MC and LM conceived of the study and led study design. RC and ML drafted this manuscript.  
46  
47 All authors made substantive contributions to the development of the protocol, critically reviewed  
48  
49 and gave final approval to the manuscript. AA is responsible for management of the trial and process  
50  
51 evaluation supported by ML. HY, AF, LMc, JW, CB, RF, LO'H and JB contributed to the design of study  
52  
53 and development of trial recruitment areas and PPI involvement. HY and AF led on young people's  
54  
55 advisory group. CM and JW contributed to sample size calculation and statistical analysis plan. RH  
56  
57  
58

1  
2  
3 developed the economic evaluation. LO'H contributed to knowledge translation and dissemination  
4  
5 plan.

## 6 7 8 **REFERENCES**

9  
10  
11 1. Harden A, Brunton G, Fletcher A, et al. Teenage pregnancy and social disadvantage: systematic  
12 review integrating controlled trials and qualitative studies. *BMJ* 2009;339:b4254 doi:  
13 10.1136/bmj.b4254 [published Online First: 13 November 2009].

14  
15  
16  
17 2. Office of National Statistics (2014) International comparisons of teenage births 2014.  
18 [http://web.ons.gov.uk/ons/rel/vsob1/births-by-area-of-usual-residence-of-mother--england-and-](http://web.ons.gov.uk/ons/rel/vsob1/births-by-area-of-usual-residence-of-mother--england-and-wales/2012/sty-international-comparisons-of-teenage-pregnancy.html)  
19 [wales/2012/sty-international-comparisons-of-teenage-pregnancy.html](http://web.ons.gov.uk/ons/rel/vsob1/births-by-area-of-usual-residence-of-mother--england-and-wales/2012/sty-international-comparisons-of-teenage-pregnancy.html) (Accessed May 20th 2016)

20  
21  
22  
23  
24 3. Office of National Statistics. Dataset: 2015 Conception Statistics, England and Wales  
25 [https://www.ons.gov.uk/peoplepopulationandcommunity/birthsdeathsandmarriages/conceptionan](https://www.ons.gov.uk/peoplepopulationandcommunity/birthsdeathsandmarriages/conceptionandfertilityrates/datasets/conceptionstatisticsenglandandwalesreferencetables)  
26 [d](https://www.ons.gov.uk/peoplepopulationandcommunity/birthsdeathsandmarriages/conceptionandfertilityrates/datasets/conceptionstatisticsenglandandwalesreferencetables)  
27 [fertilityrates/datasets/conceptionstatisticsenglandandwalesreferencetables](https://www.ons.gov.uk/peoplepopulationandcommunity/birthsdeathsandmarriages/conceptionandfertilityrates/datasets/conceptionstatisticsenglandandwalesreferencetables) [Accessed October  
28 2017].

29  
30  
31  
32  
33 4. NHS Scotland Information Services Division. Teenage Pregnancy Year of conception ending 31  
34 December 2015. [https://www.isdscotland.org/Health-Topics/Sexual-Health/Publications/2017-07-](https://www.isdscotland.org/Health-Topics/Sexual-Health/Publications/2017-07-04/2017-07-04-TeenPreg-Summary.pdf)  
35 [04/2017-07-04-TeenPreg-Summary.pdf](https://www.isdscotland.org/Health-Topics/Sexual-Health/Publications/2017-07-04/2017-07-04-TeenPreg-Summary.pdf) [published 04 July 2017, Accessed October 2017].

36  
37  
38  
39  
40 5. NISRA. Births (administrative geographies) 1999-2014. Northern Ireland Statistics & Research  
41 Agency (NISRA); 2015.

42  
43  
44  
45 6. Department of Health Social Services and Public Safety. NI health and social care inequalities  
46 monitoring system (HSCIMS) - Health inequalities in Northern Ireland: key facts 2015;  
47 <https://www.health-ni.gov.uk/sites/default/files/publications/dhssps/hscims-2015-key-facts.pdf>  
48  
49 [published 2015, Accessed September 2017].

50  
51  
52  
53  
54 7. Bonell C. Why is teenage pregnancy conceptualized as a social problem? A review of quantitative  
55 research from the USA and UK. *Cult Health Sex* 2004;6:255-72 doi:

1  
2  
3 10.1080/13691050310001643025 [published Online First: 6 October 2011].  
4

5 8. Beers LAS, Hollo RE. Approaching the adolescent-headed family: a review of teen parenting. *Curr*  
6 *Probl Pediatr Adolesc Health Care* 2009;39:216–33 doi: 10.1016/j.cppeds.2009.09.001 [published  
7 Online First 24 October 2009].  
8  
9

10 9. Francesconi M. Adult outcomes for children of teenage mothers. *Scand J Econ* 2008;110:93–117  
11 doi: 10.1111/j.1467-9442.2008.00526.x [published Online First March 2008].  
12  
13

14 10. Wight D, Raab GM, Henderson M, et al. Limits of teacher delivered sex education: interim  
15 behavioural outcomes from randomised trial. *BMJ* 2002;324:1430 doi: 10.1136/bmj.324.7351.1430  
16 [published Online First 15 June 2002].  
17  
18  
19

20 11. Silva M. The effectiveness of school-based sex education programs in the promotion of abstinent  
21 behavior: a meta-analysis. *Health Educ Res* 2002;17:471–81 doi: 10.1093/her/17.4.471 [published  
22 Online First 01 August 2002].  
23  
24  
25

26 12. Stephenson JM, Oakley A, Johnson AM, et al. A school-based randomized controlled trial of peer-  
27 led sex education in England. *Control Clin Trials* 2003;24:643–57 doi: 10.1016/S0197-2456(03)00070-  
28 9 [published Online First 13 September 2003].  
29  
30

31 13. Fullerton D. Promoting Positive Adolescent Sexual Health & Preventing Teenage Pregnancy-of  
32 Recent Effectiveness Research. Dublin: Crisis Pregnancy Programme [http://crisispregnancy.ie/wp-](http://crisispregnancy.ie/wp-content/uploads/2012/05/Rep22.-promoting-positive-adolescent-sexual-health-and-preventing-teenage-pregnancy-a-review-of-recent-effectiveness-research.pdf)  
33 [content/uploads/2012/05/Rep22.-promoting-positive-adolescent-sexual-health-and-preventing-](http://crisispregnancy.ie/wp-content/uploads/2012/05/Rep22.-promoting-positive-adolescent-sexual-health-and-preventing-teenage-pregnancy-a-review-of-recent-effectiveness-research.pdf)  
34 [teenage-pregnancy-a-review-of-recent-effectiveness-research.pdf](http://crisispregnancy.ie/wp-content/uploads/2012/05/Rep22.-promoting-positive-adolescent-sexual-health-and-preventing-teenage-pregnancy-a-review-of-recent-effectiveness-research.pdf) [published 2004, Accessed  
35 September 2017].  
36  
37  
38

39 14. Henderson M, Wight D, Raab GM, et al. Impact of a theoretically based sex education  
40 programme (SHARE) delivered by teachers on NHS registered conceptions and terminations: final  
41 results of cluster randomised trial. *BMJ* 2007;334:133 doi: 10.1136/bmj.39014.503692.55 [published  
42 Online First 18 January 2007].  
43  
44  
45  
46  
47  
48

- 1  
2  
3 15. Shepherd J, Kavanagh J, Picot J, et al. The effectiveness and cost-effectiveness of behavioural  
4 interventions for the prevention of sexually transmitted infections in young people aged 13-19: a  
5 systematic review and economic evaluation. *Health Technol Assess* 2010;14:1–206 doi:  
6 10.3310/hta14070 [published Online First February 2010].  
7  
8  
9  
10  
11  
12 16. Elliott L, Henderson M, Nixon C, et al. Has untargeted sexual health promotion for young people  
13 reached its limit? A quasi-experimental study. *J Epidemiol Community Health* 2013;67:398–404 doi:  
14 10.1136/jech-2012-201034 [published Online First 20 February 2013].  
15  
16  
17  
18 17. Downing J, Jones L, Cook P, et al. Prevention of sexually transmitted infections (STIs): a review of  
19 reviews into the effectiveness of non-clinical interventions: Evidence Briefing Update  
20 [https://www.nice.org.uk/guidance/ph3/evidence/evidence-briefing-update-prevention-of-sexually-](https://www.nice.org.uk/guidance/ph3/evidence/evidence-briefing-update-prevention-of-sexually-transmitted-infections-stis-2006-65843250)  
21 [transmitted-infections-stis-2006-65843250](https://www.nice.org.uk/guidance/ph3/evidence/evidence-briefing-update-prevention-of-sexually-transmitted-infections-stis-2006-65843250) [published 2006, Accessed September 2017].  
22  
23  
24  
25  
26  
27  
28 18. Swann C, Bowe K, McCormick G, et al. Teenage pregnancy and parenthood: a review of reviews.  
29 Evidence briefing for Health Development Agency. London: Health Development Agency; 2003.  
30  
31  
32  
33 19. Ellis S, Grey A. Prevention of Sexually Transmitted Infections (STIs): a review of reviews into the  
34 effectiveness of non-clinical interventions to reduce the risk of sexual transmission. Evidence  
35 Briefing. London: Health Development Agency; 2004.  
36  
37  
38  
39  
40 20. Ingham R, Hirst J. Promoting sexual health. In: Dennison C, Warwick I, editors. Promoting Health  
41 and Wellbeing in Schools. London: Routledge; 2010.  
42  
43  
44 21. Oranganje C, Meremikwu MM, Eko H, et al. Interventions for preventing unintended pregnancies  
45 among adolescents. *Cochrane Database Syst Rev* 2009;3:2:CD005215 doi:  
46 10.1002/14651858.CD005215.pub3 [published Online First 3 February 2016].  
47  
48  
49  
50  
51 22. National Institute for Health and Care Excellence. Sexually transmitted infections and under-18  
52 conceptions: prevention; 2007.  
53  
54  
55  
56  
57  
58  
59  
60

- 1  
2  
3 23. Committee for Health, Social Services and Public Safety, Northern Ireland Assembly. Official  
4 Report (Hansard) Sexual Health Promotion Strategy and Action Plan 2008-2013  
5 [http://www.niassembly.gov.uk/globalassets/documents/official-reports/health/2011-2012/sexual-  
7 health-promotion-strategy-and-action-plan-2008-2013.pdf](http://www.niassembly.gov.uk/globalassets/documents/official-reports/health/2011-2012/sexual-<br/>6 health-promotion-strategy-and-action-plan-2008-2013.pdf) [published 18 April 2012, Accessed  
8 September 2017].  
9  
10  
11  
12  
13  
14 24. The Scottish Government. Pregnancy and Parenthood in Young People Strategy 2016-2026  
15 [https://www.scottishwomensconvention.org/content/outcomes-scotland-2016/Pregnancy-and-  
17 Parenthood.pdf](https://www.scottishwomensconvention.org/content/outcomes-scotland-2016/Pregnancy-and-<br/>16 Parenthood.pdf) [published March 2016, Accessed September 2017].  
18  
19  
20  
21 25. Kirby D, Laris B, Rolleri L. Sex and HIV education programs for youth: Their impact and important  
22 characteristics <http://recapp.etr.org/recapp/documents/programs/SexHIVedProgs.pdf> [published 13  
23 May 2006, Accessed September 2017].  
24  
25  
26  
27  
28 26. Kirby D. Effective approaches to reducing adolescent unprotected sex, pregnancy, and  
29 childbearing. *J Sex Res* 2002;39:51–7 doi: 10.1080/00224490209552120 [published Online First 11  
30 January 2010].  
31  
32  
33  
34  
35 27. Kirby D. Emerging Answers 2007: Research findings on programs to reduce teen pregnancy and  
36 sexually transmitted diseases. Washington DC: National Campaign to Prevent Teen and Unplanned  
37 Pregnancy <http://www.siecus.org/index.cfm?fuseaction=Feature.showFeature&featureID=1151>  
38 [published November 2007, Accessed September 2017].  
39  
40  
41  
42  
43  
44 28. Robin L, Dittus P, Whitaker D, et al. Behavioral interventions to reduce incidence of HIV, STD, and  
45 pregnancy among adolescents: a decade in review. *J Adolesc Health* 2004;34:3–26 doi:  
46 10.1016/S1054-139X(03)00244-1 [published Online First 29 December 2003].  
47  
48  
49  
50  
51 29. Bailey JV, Murray E, Rait G, et al. Interactive computer-based interventions for sexual health  
52 promotion. *Cochrane Database Syst Rev* 2010;9:CD006483 doi: 10.1002/14651858.CD006483.pub2  
53 [published Online First 8 September 2010].  
54  
55  
56  
57  
58  
59  
60

- 1  
2  
3 30. Guse K, Levine D, Martins S, et al. Interventions using new digital media to improve adolescent  
4 sexual health: A systematic review. *J Adolesc Health* 2012;51:535–43 doi:  
5 10.1016/j.jadohealth.2012.03.014 [published First Online 4 May 2012].  
6  
7  
8  
9  
10 31. Noar SM, Pierce LB, Black HG. Can Computer-Mediated Interventions Change Theoretical  
11 Mediators of Safer Sex? A Meta-Analysis. *Hum Commun Res* 2010;36:261–97 doi: 10.1111/j.1468-  
12 2958.2010.01376.x [published Online First 7 June 2010].  
13  
14  
15  
16  
17 32. Lohan M, Cruise S, O'Halloran P, et al. Adolescent men's attitudes and decision-making in  
18 relation to an unplanned pregnancy. Responses to an interactive video drama. *Soc Sci Med*  
19 2011;72:1507–14 doi: 10.1016/j.socscimed.2011.02.044 [published Online First 24 March 2011].  
20  
21  
22  
23  
24 33. Smith LH, Guthrie BJ, Oakley DJ. Studying adolescent male sexuality: Where are we? *J Youth*  
25 *Adolesc* 2005;34:361–77 doi: 10.1007/s10964-005-5762-5  
26  
27  
28  
29 34. Guttmacher Institute. In their own right: Addressing the sexual and reproductive health needs of  
30 American men [https://www.guttmacher.org/report/their-own-right-addressing-sexual-and-](https://www.guttmacher.org/report/their-own-right-addressing-sexual-and-reproductive-health-needs-american-men)  
31 [reproductive-health-needs-american-men](https://www.guttmacher.org/report/their-own-right-addressing-sexual-and-reproductive-health-needs-american-men) [published October 2003, Accessed September 2017].  
32  
33  
34  
35 35. Marsiglio W, Ries A, Sonenstein F, et al. It's a Guy Thing: Boys, Young Men, and Teen Pregnancy  
36 Prevention. The National Campaign to Prevent Teen Pregnancy  
37 <https://thenationalcampaign.org/resource/its-guy-thing> [published February 2006, Accessed  
38 September 2017].  
39  
40  
41  
42  
43  
44 36. Lindberg LD, Sonfield A, Gemmill A. Reassessing adolescent male sexual and reproductive health  
45 in the United States: research and recommendations. *Am J Mens Health* 2008;2:40–56 doi:  
46 10.1177/1557988307309460 [published Online First 5 December 2007].  
47  
48  
49  
50  
51 37. WHO. Evidence for gender responsive actions to prevent and manage adolescent pregnancy  
52 [http://www.euro.who.int/\\_data/assets/pdf\\_file/0008/158093/316637\\_WHO\\_brochure\\_226x226\\_](http://www.euro.who.int/_data/assets/pdf_file/0008/158093/316637_WHO_brochure_226x226_5-AdolecentPregnancy.pdf)  
53 [5-AdolecentPregnancy.pdf](http://www.euro.who.int/_data/assets/pdf_file/0008/158093/316637_WHO_brochure_226x226_5-AdolecentPregnancy.pdf) [published 2011, Accessed September 2017].  
54  
55  
56  
57  
58  
59  
60



1  
2  
3 38. WHO. Health 2020: a European policy framework supporting action across government and  
4 society for health and well-being

5  
6  
7 [http://www.euro.who.int/\\_data/assets/pdf\\_file/0006/199536/Health2020-Short.pdf?ua=1](http://www.euro.who.int/_data/assets/pdf_file/0006/199536/Health2020-Short.pdf?ua=1)

8  
9 [published 2013, Accessed Setember 2017].

10  
11  
12 39. WHO. Health policy framework supporting action across government and society for health and  
13 well-being. 2012.

14  
15  
16 40. Ries A, Sonenstein F. What works for boys: A re-examination of coeducational school curricula.  
17 In: Troccoli K, editor. It's a guy thing boys young men and teen pregnancy prevention. Washington  
18 DC: National Campaign to Prevent Teen Pregnancy 2006:101–38.

19  
20  
21 41. Bennett SE, Assefi NP. School-based teenage pregnancy prevention programs: a systematic  
22 review of randomized controlled trials. *J Adolesc Health* 2005;36:72–81 doi:  
23 <https://doi.org/10.1016/j.jadohealth.2003.11.097> [published Online First 18 January 2005].

24  
25  
26 42. Craig P, Dieppe P, Macintyre S, et al. Developing and evaluating complex interventions: the new  
27 Medical Research Council guidance. *BMJ* 2008;337:a1655 doi: 10.1136/bmj.a1655 [published Online  
28 First 29 September 2008].

29  
30  
31 43. Lohan M, Aventin Á, Maguire L, et al. Increasing boys' and girls' intention to avoid teenage  
32 pregnancy: a cluster randomised control feasibility trial of an interactive video drama based  
33 intervention in post-primary schools in Northern Ireland. *Public Health Res* 2017;5 doi:  
34 10.3310/phr05010 [published Online First March 2017].

35  
36  
37 44. Crawford C, Cribb J, Kelly E. Teenage Pregnancy in England. Centre for the Analysis of Youth  
38 Transitions <https://www.ifs.org.uk/publications/6702> [published 21 May 2013, Accessed September  
39 2017].

40  
41  
42 45. Jones L, Bates G, Downing J, et al. A review of the effectiveness and cost-effectiveness of  
43 personal social and health education in secondary schools focussing on sex and relationships and  
44

1  
2  
3 alcohol education for young people aged 11-19 years. Final Report  
4 [https://www.nice.org.uk/guidance/gid-phg0/documents/pshe-evidence-review-secondary-](https://www.nice.org.uk/guidance/gid-phg0/documents/pshe-evidence-review-secondary-education-and-fe2)  
5 [education-and-fe2](https://www.nice.org.uk/guidance/gid-phg0/documents/pshe-evidence-review-secondary-education-and-fe2) [published October 2009, Accessed September 2017].  
6  
7

8  
9  
10 46. Education and Training Inspectorate NI. Report of an evaluation of relationships and sexuality  
11 education in post-primary schools [https://www.etini.gov.uk/publications/report-evaluation-](https://www.etini.gov.uk/publications/report-evaluation-relationships-and-sexuality-education-post-primary-schools)  
12 [relationships-and-sexuality-education-post-primary-schools](https://www.etini.gov.uk/publications/report-evaluation-relationships-and-sexuality-education-post-primary-schools) [published 11 January 2011, Accessed  
13  
14  
15  
16  
17  
18  
19  
20  
21  
22  
23  
24  
25  
26  
27  
28  
29  
30  
31  
32  
33  
34  
35  
36  
37  
38  
39  
40  
41  
42  
43  
44  
45  
46  
47  
48  
49  
50  
51  
52  
53  
54  
55  
56  
57  
58  
59  
60

46. Education and Training Inspectorate NI. Report of an evaluation of relationships and sexuality  
education in post-primary schools [https://www.etini.gov.uk/publications/report-evaluation-](https://www.etini.gov.uk/publications/report-evaluation-relationships-and-sexuality-education-post-primary-schools)  
[relationships-and-sexuality-education-post-primary-schools](https://www.etini.gov.uk/publications/report-evaluation-relationships-and-sexuality-education-post-primary-schools) [published 11 January 2011, Accessed  
September 2017].

47. Ofsted. Not yet good enough: personal, social, health and economic education in schools  
[http://webarhive.nationalarchives.gov.uk/20141107025925/http://www.ofsted.gov.uk/resources/](http://webarhive.nationalarchives.gov.uk/20141107025925/http://www.ofsted.gov.uk/resources/not-yet-good-enough-personal-social-health-and-economic-education-schools)  
[not-yet-good-enough-personal-social-health-and-economic-education-schools](http://webarhive.nationalarchives.gov.uk/20141107025925/http://www.ofsted.gov.uk/resources/not-yet-good-enough-personal-social-health-and-economic-education-schools) [published 01 May  
2013, Accessed September 2017].

48. WHO, 2016. Growing up unequal: gender and socioeconomic differences in young people's  
health and well-being. Health Behaviour in School-aged Children (HBSC) study: international report  
from the 2013/2014 survey. Health Policy for Children and Adolescents, No. 7; 2016  
[http://www.euro.who.int/\\_data/assets/pdf\\_file/0003/303438/HSBC-No.7-Growing-up-unequal-](http://www.euro.who.int/_data/assets/pdf_file/0003/303438/HSBC-No.7-Growing-up-unequal-Full-Report.pdf?ua=1)  
[Full-Report.pdf?ua=1](http://www.euro.who.int/_data/assets/pdf_file/0003/303438/HSBC-No.7-Growing-up-unequal-Full-Report.pdf?ua=1) [Accessed September 2017].

49. Northern Ireland Statistics and Research Agency. Central Survey Unit. (2015). Young Persons'  
Behaviour and Attitudes Survey, 2013. [data collection]. UK Data Service. SN: 7624,  
<http://doi.org/10.5255/UKDA-SN-7624-1>

50. Chin HB, Sipe TA, Elder R, et al. The effectiveness of group-based comprehensive risk-reduction  
and abstinence education interventions to prevent or reduce the risk of adolescent pregnancy,  
human immunodeficiency virus, and sexually transmitted infections: two systematic reviews for the  
Guide to Community Preventive Services. *Am J Prev Med* 2012;42:272-94 doi:  
10.1016/j.amepre.2011.11.006 [published Online First 14 February 2012].

- 1  
2  
3 51. Santelli JS, Lindberg LD, Finer LB, et al. Explaining recent declines in adolescent pregnancy in the  
4  
5 United States: the contribution of abstinence and improved contraceptive use. *Am J Public Health*  
6  
7 2007;97:150–6 doi: 10.2105/AJPH.2006.089169 [published Online First 10 October 2011].  
8  
9  
10 52. Parkes A, Wight D, Henderson M, et al. Contraceptive method at first sexual intercourse and  
11  
12 subsequent pregnancy risk: findings from a secondary analysis of 16-year-old girls from the RIPPLE  
13  
14 and SHARE studies. *J Adolesc Health* 2009;44:55–63 doi: 10.1016/j.jadohealth.2008.06.006  
15  
16 [published Online First 18 October 2008].  
17  
18  
19 53. Eldridge SM, Costelloe CE, Kahan BC, et al. How big should the pilot study for my cluster  
20  
21 randomised trial be? *Stat Methods Med Res* 2016;25:1039-56 doi: 10.1177/0962280215588242  
22  
23 [published First Online 12 June 2015].  
24  
25  
26 54. Aventin A, Lohan M, Maguire L, et al. Recruiting faith- and non-faith-based schools, adolescents  
27  
28 and parents to a cluster randomised sexual-health trial: experiences, challenges and lessons from  
29  
30 the mixed-methods Jack Feasibility Trial. *Trials* 2016;17:365 doi: 10.1186/s13063-016-1506-y  
31  
32 [published Online First 29 July 2016].  
33  
34  
35 55. Hoffmann TC, Glasziou PP, Boutron I, et al. Better reporting of interventions: template for  
36  
37 intervention description (TIDieR) checklist and guide. *BMJ* 2014;348:g1687 doi: 10.1136/bmj.g1687  
38  
39 [published Online First 07 March 2014].  
40  
41  
42 56. Ajzen I, Madden TJ. Prediction of goal-directed behavior: Attitudes, intentions, and perceived  
43  
44 behavioral control. *J Exp Soc Psychol* 1986;22:453–74 doi: 10.1016/0022-1031(86)90045-4  
45  
46 [published Online First 27 August 2004].  
47  
48  
49 57. Ajzen I. The theory of planned behaviour: reactions and reflections. *Psychol Health*  
50  
51 2011;26:1113–27 doi: 10.1080/08870446.2011.613995 [published Online First 20 September 2011].  
52  
53  
54  
55  
56  
57  
58  
59  
60

- 1  
2  
3 58. NHS Health Scotland. An overview of the effectiveness of sexual health improvement  
4 interventions. Final Report. June 2010 [http://www.healthscotland.com/uploads/documents/13786-](http://www.healthscotland.com/uploads/documents/13786-REO28-OverviewEffectivenessSexualHealthInterventions.pdf)  
5 [REO28-OverviewEffectivenessSexualHealthInterventions.pdf](http://www.healthscotland.com/uploads/documents/13786-REO28-OverviewEffectivenessSexualHealthInterventions.pdf) [Accessed September 2017].  
6  
7  
8  
9  
10 59. Moore G, Evans R. What theory, for whom and in which context? Reflections on the application  
11 of theory in the development and evaluation of complex population health intervention. *SSM -*  
12 *Population Health* 2017;3:132-5 doi: 10.1016/j.ssmph.2016.12.005 [published Online First 13  
13 December 2016].  
14  
15  
16  
17  
18 60. Philliber S, Kaye JW, Herrling S, West E. Preventing pregnancy and improving health care access  
19 among teenagers: An evaluation of the Children's Aid Society-Carrera Program. *Perspect Sex Reprod*  
20 *Health* 2002;244–51 doi: 10.1363/3424402 [published Online First 1 September 2002].  
21  
22  
23  
24  
25 61. Coyle K, Basen-Engquist K, Kirby D, et al. Safer choices: reducing teen pregnancy, HIV, and STDs.  
26 *Public Health Rep* 2001;116(Suppl 1):82–93 doi: 10.1093/phr/116.S1.82  
27  
28  
29  
30 62. Aventin Á, Lohan M, O'Halloran P, et al. Design and development of a film-based Intervention  
31 about teenage men and unintended pregnancy: Applying the Medical Research Council Framework  
32 in practice. *Eval Progr Plan* 2015;49:19–30 doi: 10.1016/j.evalprogplan.2014.11.003 [published  
33 Online First 15 November 2014].  
34  
35  
36  
37  
38 63. NHS Health Scotland. Evaluation of Healthy Respect Phase Two: Final Report March 2010  
39 [http://www.healthscotland.com/uploads/documents/12159-](http://www.healthscotland.com/uploads/documents/12159-HealthyRespectEvaluationReport_3342.pdf)  
40 [HealthyRespectEvaluationReport\\_3342.pdf](http://www.healthscotland.com/uploads/documents/12159-HealthyRespectEvaluationReport_3342.pdf) [Accessed September 2017].  
41  
42  
43  
44  
45 64. Guttmacher Institute. Adolescent sexual and reproductive health in the United States  
46 <https://www.guttmacher.org/fact-sheet/american-teens-sexual-and-reproductive-health> [Accessed  
47 September 2017].  
48  
49  
50  
51  
52 65. Kirby D. Sexuality Education: An evaluation of programs and their Effects. An executive summary.  
53 1984. Washington DC: Network Publications.  
54  
55  
56  
57  
58  
59  
60

- 1  
2  
3 66. Pleck JH, Sonenstein FL, Ku LC. Masculinity ideology: Its impact on adolescent males'  
4 heterosexual relationships. *J Soc Issues* 1993;49:1-29 doi: 10.1111/j.1540-4560.1993.tb01166.x  
5  
6 [published Online First 14 April 2010].  
7  
8  
9  
10 67. Lottes I, Kuriloff P. Sexual socialization differences by gender, Greek membership, ethnicity and  
11 religious background. *Psychol Women Quar* 1994;18:203-19 doi: 10.1111/j.1471-  
12 6402.1994.tb00451.x {publish Online First 28 July 2006}.  
13  
14  
15  
16  
17 68. Quinn-Nilas C, Milhausen RR, Breuer R, Bailey J, Pavlou M, DiClemente RJ, Wingood GM.  
18 Validation of the Sexual Communication Self-Efficacy Scale. *Health Education & Behavior*. 2016  
19 Apr;43(2):165-71.  
20  
21  
22  
23  
24 69. May C. Towards a general theory of implementation. *Implement Sci* 2013;8:18 doi:  
25 10.1186/1748-5908-8-18 [published Online First 13 February 2013].  
26  
27  
28  
29 70. Moore GF, Audrey S, Barker M, et al. Process evaluation of complex interventions: Medical  
30 Research Council guidance. *BMJ* 2015;350:h1258 doi: 10.1136/bmj.h1258 [published 19 March  
31 2015].  
32  
33  
34  
35  
36 71. National Institute for Health and Care Excellence. Methods for the development of NICE Public  
37 Health Guidance (third edition) <https://www.nice.org.uk/process/pmg4/chapter/introduction>  
38 [published September 2012, accessed September 2017].  
39  
40  
41  
42  
43 72. Edwards RT, Charles JM, Lloyd-Williams H. Public health economics: a systematic review of  
44 guidance for the economic evaluation of public health interventions and discussion of key  
45 methodological issues. *BMC Public Health* 2013;13:1001 doi: 10.1186/1471-2458-13-1001 [published  
46 Online First 24 October 2013].  
47  
48  
49  
50  
51  
52  
53  
54  
55  
56  
57  
58  
59  
60

- 1  
2  
3 73. Bailey J, Mann S, Wayal S, et al. Sexual health promotion for young people delivered via digital  
4  
5 media: a scoping review. *Public Health Res* 2015;3 doi: 10.3310/phr03130 [published Online First  
6  
7 November 2015].  
8  
9  
10 74. Campbell MK, Piaggio G, Elbourne DR, et al. Consort 2010 statement: extension to cluster  
11  
12 randomised trials. *BMJ* 2012;345:e5661 doi: 10.1136/bmj.e5661 [published Online First 04  
13  
14 September 2012].  
15  
16  
17 75. Kahan BC, Jairath V, Doré CJ, et al. The risks and rewards of covariate adjustment in randomized  
18  
19 trials: an assessment of 12 outcomes from 8 studies. *Trials* 2014;15:1 doi: 10.1186/1745-6215-15-  
20  
21 139 [published Online First 23 April 2014].  
22  
23  
24 76. Kraemer HC, Wilson GT, Fairburn CG, et al. Mediators and moderators of treatment effects in  
25  
26 randomized clinical trials. *Arch Gen Psychiatry* 2002;59:877–83 doi: 10.1001/archpsyc.59.10.877  
27  
28  
29 77. Braun V, Clarke V. Using thematic analysis in psychology. *Qual Res Psychol* 2006;3:77–101 doi:  
30  
31 10.1191/1478088706qp063oa [published Online First 21 July 2008].  
32  
33  
34 78. Lincoln YS, Guba EG. *Naturalistic Inquiry*. Newbury Park CA: Sage; 1985.  
35  
36  
37 79. Hyde A, Howlett E, Brady D, et al. The focus group method: Insights from focus group interviews  
38  
39 on sexual health with adolescents. *Soc Sci Med* 2005;61:2588–99 doi:  
40  
41 <https://doi.org/10.1016/j.socscimed.2005.04.040> [published Online First 13 June 2005].  
42  
43  
44 80. Department of Education NI. Institution search. [http://apps.education-](http://apps.education-ni.gov.uk/appinstitutes/default.aspx)  
45  
46 [ni.gov.uk/appinstitutes/default.aspx](http://apps.education-ni.gov.uk/appinstitutes/default.aspx) [Accessed October 2017].  
47  
48  
49 81. Schulz KF, Altman DG, Moher D, for the CONSORT Group. CONSORT 2010 Statement: updated  
50  
51 guidelines for reporting parallel group randomised trials. *BMJ* 2010;340:c332 doi: 10.1136/bmj.c332  
52  
53 [published Online First 24 March 2010].  
54  
55  
56  
57  
58  
59  
60

1  
2  
3 82. Chan A-W, Tetzlaff JM, Altman, DG, et al. SPIRIT 2013 Statement: Defining standard protocol  
4 items for clinical trials. *Ann Intern Med* 2013;158:200-7 doi: 10.7326/0003-4819-158-3-201302050-  
5 00583  
6  
7

8  
9  
10 83. Chan A-W, Tetzlaff JM, Gøtzsche PC, et al. SPIRIT 2013 explanation and elaboration: guidance for  
11 protocols of clinical trials. *BMJ* 2013;346:e7568 doi: 10.1136/bmj.e7586 [published Online First 09  
12 January 2013].  
13  
14

15  
16 84. WHO Trial Registration Data Set (Version 1.2.1). Available at  
17 <http://www.who.int/ictrp/network/trds/en/> [Accessed 07.08.17]  
18  
19  
20  
21  
22  
23

## 24 **FIGURE LEGENDS**

25  
26  
27 **Figure 1:** The JACK Trial Flowchart  
28

29  
30 **Figure 2:** School recruitment strategy  
31

32  
33 **Figure 3:** *If I Were Jack* Theory of Change Logic Model  
34

35  
36 **Figure 4:** Integration of process evaluation with experimental design methodology to achieve  
37 research objectives  
38

39  
40 **Figure 5:** Current and future impacts of *If I Were Jack* on costs and benefits  
41  
42  
43  
44  
45  
46  
47  
48  
49  
50  
51  
52  
53  
54  
55  
56  
57  
58  
59  
60



Figure 1: The JACK Trial Flowchart

210x297mm (300 x 300 DPI)



1  
2  
3  
4  
5  
6  
7  
8  
9  
10  
11  
12  
13  
14  
15  
16  
17  
18  
19  
20  
21  
22  
23  
24  
25  
26  
27  
28  
29  
30  
31  
32  
33  
34  
35  
36  
37  
38  
39  
40  
41  
42  
43  
44  
45  
46  
47  
48  
49  
50  
51  
52  
53  
54  
55  
56  
57  
58  
59  
60



Figure 2: School recruitment strategy  
210x297mm (300 x 300 DPI)

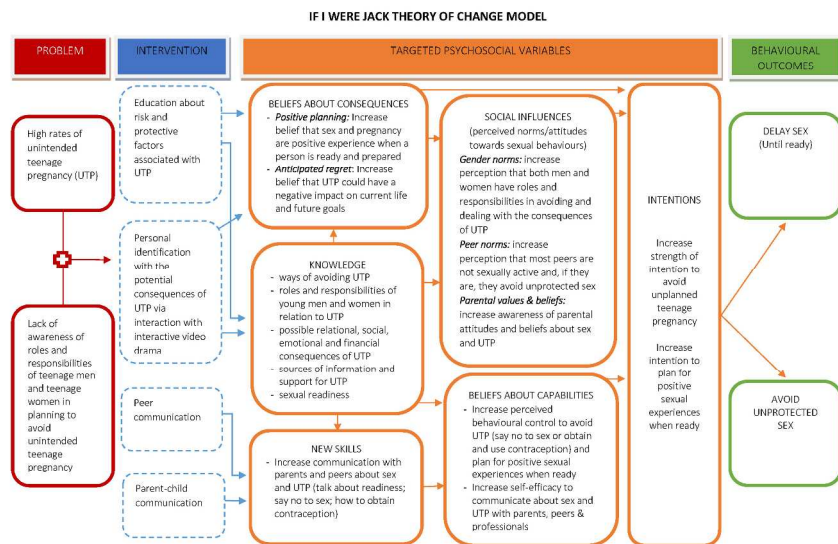

Figure 3: If I Were Jack Theory of Change Logic Model

297x210mm (300 x 300 DPI)

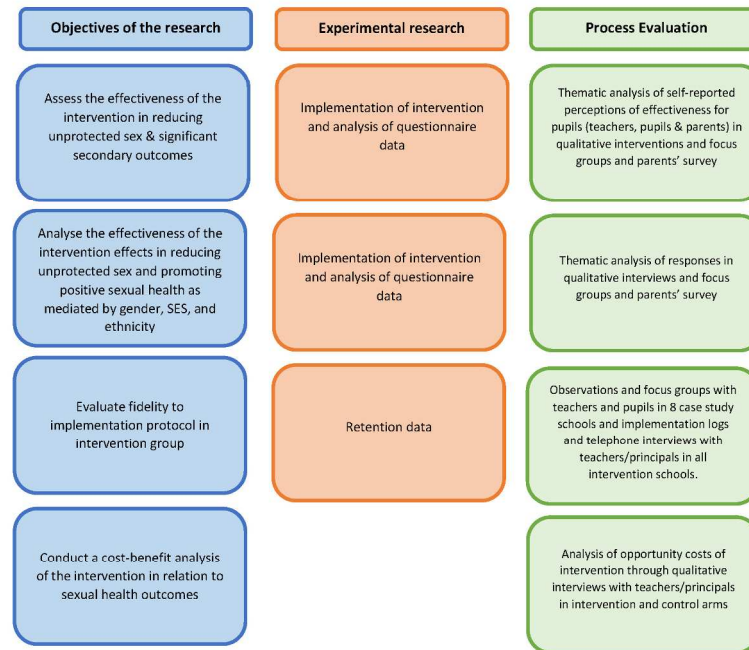

Figure 4: Integration of process evaluation with experimental design methodology to achieve research objectives

210x297mm (300 x 300 DPI)



Figure 5: Current and future impacts of If I Were Jack on costs and benefits

297x210mm (300 x 300 DPI)

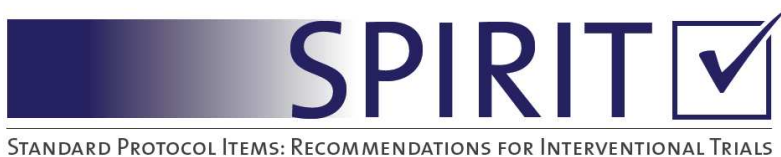

1  
2  
3  
4  
5  
6  
7  
8  
9  
10  
11  
12  
13  
14  
15  
16  
17  
18  
19  
20  
21  
22  
23  
24  
25  
26  
27  
28  
29  
30  
31  
32  
33  
34  
35  
36  
37  
38  
39  
40  
41  
42  
43  
44  
45  
46  
47

SPIRIT 2013 Checklist: Recommended items to address in a clinical trial protocol and related documents\*

| Section/item                      | Item No | Description                                                                                                                                                                                                                                                                              | Addressed on page number |
|-----------------------------------|---------|------------------------------------------------------------------------------------------------------------------------------------------------------------------------------------------------------------------------------------------------------------------------------------------|--------------------------|
| <b>Administrative information</b> |         |                                                                                                                                                                                                                                                                                          |                          |
| Title                             | 1       | Descriptive title identifying the study design, population, interventions, and, if applicable, trial acronym                                                                                                                                                                             | _____1_____              |
| Trial registration                | 2a      | Trial identifier and registry name. If not yet registered, name of intended registry                                                                                                                                                                                                     | _____2_____              |
|                                   | 2b      | All items from the World Health Organization Trial Registration Data Set                                                                                                                                                                                                                 | 22 (sup file 3)          |
| Protocol version                  | 3       | Date and version identifier                                                                                                                                                                                                                                                              | _____                    |
| Funding                           | 4       | Sources and types of financial, material, and other support                                                                                                                                                                                                                              | _____24_____             |
| Roles and responsibilities        | 5a      | Names, affiliations, and roles of protocol contributors                                                                                                                                                                                                                                  | _____1, 24_____          |
|                                   | 5b      | Name and contact information for the trial sponsor                                                                                                                                                                                                                                       | _____                    |
|                                   | 5c      | Role of study sponsor and funders, if any, in study design; collection, management, analysis, and interpretation of data; writing of the report; and the decision to submit the report for publication, including whether they will have ultimate authority over any of these activities | _____24_____             |
|                                   | 5d      | Composition, roles, and responsibilities of the coordinating centre, steering committee, endpoint adjudication committee, data management team, and other individuals or groups overseeing the trial, if applicable (see Item 21a for data monitoring committee)                         | _____                    |

## Introduction

|                          |    |                                                                                                                                                                                                           |     |
|--------------------------|----|-----------------------------------------------------------------------------------------------------------------------------------------------------------------------------------------------------------|-----|
| Background and rationale | 6a | Description of research question and justification for undertaking the trial, including summary of relevant studies (published and unpublished) examining benefits and harms for each intervention        | 4,5 |
|                          | 6b | Explanation for choice of comparators                                                                                                                                                                     | 4,5 |
| Objectives               | 7  | Specific objectives or hypotheses                                                                                                                                                                         | 5,6 |
| Trial design             | 8  | Description of trial design including type of trial (eg, parallel group, crossover, factorial, single group), allocation ratio, and framework (eg, superiority, equivalence, noninferiority, exploratory) | 6   |

## Methods: Participants, interventions, and outcomes

|                      |     |                                                                                                                                                                                                                                                                                                                                                                                |          |
|----------------------|-----|--------------------------------------------------------------------------------------------------------------------------------------------------------------------------------------------------------------------------------------------------------------------------------------------------------------------------------------------------------------------------------|----------|
| Study setting        | 9   | Description of study settings (eg, community clinic, academic hospital) and list of countries where data will be collected. Reference to where list of study sites can be obtained                                                                                                                                                                                             | 6        |
| Eligibility criteria | 10  | Inclusion and exclusion criteria for participants. If applicable, eligibility criteria for study centres and individuals who will perform the interventions (eg, surgeons, psychotherapists)                                                                                                                                                                                   | 6,7,13   |
| Interventions        | 11a | Interventions for each group with sufficient detail to allow replication, including how and when they will be administered                                                                                                                                                                                                                                                     | 10-13    |
|                      | 11b | Criteria for discontinuing or modifying allocated interventions for a given trial participant (eg, drug dose change in response to harms, participant request, or improving/worsening disease)                                                                                                                                                                                 |          |
|                      | 11c | Strategies to improve adherence to intervention protocols, and any procedures for monitoring adherence (eg, drug tablet return, laboratory tests)                                                                                                                                                                                                                              | 16       |
|                      | 11d | Relevant concomitant care and interventions that are permitted or prohibited during the trial                                                                                                                                                                                                                                                                                  |          |
| Outcomes             | 12  | Primary, secondary, and other outcomes, including the specific measurement variable (eg, systolic blood pressure), analysis metric (eg, change from baseline, final value, time to event), method of aggregation (eg, median, proportion), and time point for each outcome. Explanation of the clinical relevance of chosen efficacy and harm outcomes is strongly recommended | 14,15    |
| Participant timeline | 13  | Time schedule of enrolment, interventions (including any run-ins and washouts), assessments, and visits for participants. A schematic diagram is highly recommended (see Figure)                                                                                                                                                                                               | Figure 1 |

1

2

3 Sample size 14 Estimated number of participants needed to achieve study objectives and how it was determined, including \_\_\_\_\_7,8\_\_\_\_\_

4 clinical and statistical assumptions supporting any sample size calculations

5

6 Recruitment 15 Strategies for achieving adequate participant enrolment to reach target sample size \_\_\_\_\_8-10\_\_\_\_\_

7

8 **Methods: Assignment of interventions (for controlled trials)**

9

10 Allocation:

11

12 Sequence generation 16a Method of generating the allocation sequence (eg, computer-generated random numbers), and list of any \_\_\_\_\_10\_\_\_\_\_

13 factors for stratification. To reduce predictability of a random sequence, details of any planned restriction

14 (eg, blocking) should be provided in a separate document that is unavailable to those who enrol participants

15 or assign interventions

16

17 Allocation concealment mechanism 16b Mechanism of implementing the allocation sequence (eg, central telephone; sequentially numbered, \_\_\_\_\_10\_\_\_\_\_

18 opaque, sealed envelopes), describing any steps to conceal the sequence until interventions are assigned

19

20

21 Implementation 16c Who will generate the allocation sequence, who will enrol participants, and who will assign participants to \_\_\_\_\_10\_\_\_\_\_

22 interventions

23

24 Blinding (masking) 17a Who will be blinded after assignment to interventions (eg, trial participants, care providers, outcome \_\_\_\_\_6\_\_\_\_\_

25 assessors, data analysts), and how

26

27 17b If blinded, circumstances under which unblinding is permissible, and procedure for revealing a participant's \_\_\_\_\_

28 allocated intervention during the trial

29

30

31 **Methods: Data collection, management, and analysis**

32

33 Data collection methods 18a Plans for assessment and collection of outcome, baseline, and other trial data, including any related \_\_\_\_\_15-20\_\_\_\_\_

34 processes to promote data quality (eg, duplicate measurements, training of assessors) and a description of

35 study instruments (eg, questionnaires, laboratory tests) along with their reliability and validity, if known.

36 Reference to where data collection forms can be found, if not in the protocol

37

38 18b Plans to promote participant retention and complete follow-up, including list of any outcome data to be \_\_\_\_\_8-10\_\_\_\_\_

39 collected for participants who discontinue or deviate from intervention protocols

40

41

42

43

44

|    |                                 |     |                                                                                                                                                                                                                                                                                                                                       |           |
|----|---------------------------------|-----|---------------------------------------------------------------------------------------------------------------------------------------------------------------------------------------------------------------------------------------------------------------------------------------------------------------------------------------|-----------|
| 1  |                                 |     |                                                                                                                                                                                                                                                                                                                                       |           |
| 2  |                                 |     |                                                                                                                                                                                                                                                                                                                                       |           |
| 3  | Data management                 | 19  | Plans for data entry, coding, security, and storage, including any related processes to promote data quality (eg, double data entry; range checks for data values). Reference to where details of data management procedures can be found, if not in the protocol                                                                     | _____     |
| 4  |                                 |     |                                                                                                                                                                                                                                                                                                                                       |           |
| 5  |                                 |     |                                                                                                                                                                                                                                                                                                                                       |           |
| 6  |                                 |     |                                                                                                                                                                                                                                                                                                                                       |           |
| 7  | Statistical methods             | 20a | Statistical methods for analysing primary and secondary outcomes. Reference to where other details of the statistical analysis plan can be found, if not in the protocol                                                                                                                                                              | __20-21__ |
| 8  |                                 |     |                                                                                                                                                                                                                                                                                                                                       |           |
| 9  |                                 |     |                                                                                                                                                                                                                                                                                                                                       |           |
| 10 |                                 | 20b | Methods for any additional analyses (eg, subgroup and adjusted analyses)                                                                                                                                                                                                                                                              | __20-21__ |
| 11 |                                 |     |                                                                                                                                                                                                                                                                                                                                       |           |
| 12 |                                 | 20c | Definition of analysis population relating to protocol non-adherence (eg, as randomised analysis), and any statistical methods to handle missing data (eg, multiple imputation)                                                                                                                                                       | __20-21__ |
| 13 |                                 |     |                                                                                                                                                                                                                                                                                                                                       |           |
| 14 |                                 |     |                                                                                                                                                                                                                                                                                                                                       |           |
| 15 | <b>Methods: Monitoring</b>      |     |                                                                                                                                                                                                                                                                                                                                       |           |
| 16 |                                 |     |                                                                                                                                                                                                                                                                                                                                       |           |
| 17 | Data monitoring                 | 21a | Composition of data monitoring committee (DMC); summary of its role and reporting structure; statement of whether it is independent from the sponsor and competing interests; and reference to where further details about its charter can be found, if not in the protocol. Alternatively, an explanation of why a DMC is not needed | __23__    |
| 18 |                                 |     |                                                                                                                                                                                                                                                                                                                                       |           |
| 19 |                                 |     |                                                                                                                                                                                                                                                                                                                                       |           |
| 20 |                                 |     |                                                                                                                                                                                                                                                                                                                                       |           |
| 21 |                                 |     |                                                                                                                                                                                                                                                                                                                                       |           |
| 22 |                                 | 21b | Description of any interim analyses and stopping guidelines, including who will have access to these interim results and make the final decision to terminate the trial                                                                                                                                                               | __23__    |
| 23 |                                 |     |                                                                                                                                                                                                                                                                                                                                       |           |
| 24 |                                 |     |                                                                                                                                                                                                                                                                                                                                       |           |
| 25 | Harms                           | 22  | Plans for collecting, assessing, reporting, and managing solicited and spontaneously reported adverse events and other unintended effects of trial interventions or trial conduct                                                                                                                                                     | __23__    |
| 26 |                                 |     |                                                                                                                                                                                                                                                                                                                                       |           |
| 27 |                                 |     |                                                                                                                                                                                                                                                                                                                                       |           |
| 28 | Auditing                        | 23  | Frequency and procedures for auditing trial conduct, if any, and whether the process will be independent from investigators and the sponsor                                                                                                                                                                                           | _____     |
| 29 |                                 |     |                                                                                                                                                                                                                                                                                                                                       |           |
| 30 |                                 |     |                                                                                                                                                                                                                                                                                                                                       |           |
| 31 |                                 |     |                                                                                                                                                                                                                                                                                                                                       |           |
| 32 | <b>Ethics and dissemination</b> |     |                                                                                                                                                                                                                                                                                                                                       |           |
| 33 |                                 |     |                                                                                                                                                                                                                                                                                                                                       |           |
| 34 | Research ethics approval        | 24  | Plans for seeking research ethics committee/institutional review board (REC/IRB) approval                                                                                                                                                                                                                                             | __23__    |
| 35 |                                 |     |                                                                                                                                                                                                                                                                                                                                       |           |
| 36 |                                 |     |                                                                                                                                                                                                                                                                                                                                       |           |
| 37 | Protocol amendments             | 25  | Plans for communicating important protocol modifications (eg, changes to eligibility criteria, outcomes, analyses) to relevant parties (eg, investigators, REC/IRBs, trial participants, trial registries, journals, regulators)                                                                                                      | __22__    |
| 38 |                                 |     |                                                                                                                                                                                                                                                                                                                                       |           |
| 39 |                                 |     |                                                                                                                                                                                                                                                                                                                                       |           |
| 40 |                                 |     |                                                                                                                                                                                                                                                                                                                                       |           |
| 41 |                                 |     |                                                                                                                                                                                                                                                                                                                                       |           |
| 42 |                                 |     |                                                                                                                                                                                                                                                                                                                                       |           |
| 43 |                                 |     |                                                                                                                                                                                                                                                                                                                                       |           |
| 44 |                                 |     |                                                                                                                                                                                                                                                                                                                                       |           |
| 45 |                                 |     |                                                                                                                                                                                                                                                                                                                                       |           |
| 46 |                                 |     |                                                                                                                                                                                                                                                                                                                                       |           |
| 47 |                                 |     |                                                                                                                                                                                                                                                                                                                                       |           |

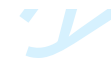



|    |                               |     |                                                                                                                                                                                                                                                                                     |       |
|----|-------------------------------|-----|-------------------------------------------------------------------------------------------------------------------------------------------------------------------------------------------------------------------------------------------------------------------------------------|-------|
| 1  |                               |     |                                                                                                                                                                                                                                                                                     |       |
| 2  |                               |     |                                                                                                                                                                                                                                                                                     |       |
| 3  | Consent or assent             | 26a | Who will obtain informed consent or assent from potential trial participants or authorised surrogates, and how (see Item 32)                                                                                                                                                        | 8-10  |
| 4  |                               |     |                                                                                                                                                                                                                                                                                     |       |
| 5  |                               |     |                                                                                                                                                                                                                                                                                     |       |
| 6  |                               | 26b | Additional consent provisions for collection and use of participant data and biological specimens in ancillary studies, if applicable                                                                                                                                               |       |
| 7  |                               |     |                                                                                                                                                                                                                                                                                     |       |
| 8  | Confidentiality               | 27  | How personal information about potential and enrolled participants will be collected, shared, and maintained in order to protect confidentiality before, during, and after the trial                                                                                                |       |
| 9  |                               |     |                                                                                                                                                                                                                                                                                     |       |
| 10 |                               |     |                                                                                                                                                                                                                                                                                     |       |
| 11 | Declaration of interests      | 28  | Financial and other competing interests for principal investigators for the overall trial and each study site                                                                                                                                                                       | 24    |
| 12 |                               |     |                                                                                                                                                                                                                                                                                     |       |
| 13 |                               |     |                                                                                                                                                                                                                                                                                     |       |
| 14 | Access to data                | 29  | Statement of who will have access to the final trial dataset, and disclosure of contractual agreements that limit such access for investigators                                                                                                                                     | 23    |
| 15 |                               |     |                                                                                                                                                                                                                                                                                     |       |
| 16 |                               |     |                                                                                                                                                                                                                                                                                     |       |
| 17 | Ancillary and post-trial care | 30  | Provisions, if any, for ancillary and post-trial care, and for compensation to those who suffer harm from trial participation                                                                                                                                                       |       |
| 18 |                               |     |                                                                                                                                                                                                                                                                                     |       |
| 19 |                               |     |                                                                                                                                                                                                                                                                                     |       |
| 20 | Dissemination policy          | 31a | Plans for investigators and sponsor to communicate trial results to participants, healthcare professionals, the public, and other relevant groups (eg, via publication, reporting in results databases, or other data sharing arrangements), including any publication restrictions | 23    |
| 21 |                               |     |                                                                                                                                                                                                                                                                                     |       |
| 22 |                               |     |                                                                                                                                                                                                                                                                                     |       |
| 23 |                               |     |                                                                                                                                                                                                                                                                                     |       |
| 24 |                               |     |                                                                                                                                                                                                                                                                                     |       |
| 25 |                               | 31b | Authorship eligibility guidelines and any intended use of professional writers                                                                                                                                                                                                      | 24,25 |
| 26 |                               |     |                                                                                                                                                                                                                                                                                     |       |
| 27 |                               | 31c | Plans, if any, for granting public access to the full protocol, participant-level dataset, and statistical code                                                                                                                                                                     |       |
| 28 |                               |     |                                                                                                                                                                                                                                                                                     |       |
| 29 | <b>Appendices</b>             |     |                                                                                                                                                                                                                                                                                     |       |
| 30 |                               |     |                                                                                                                                                                                                                                                                                     |       |
| 31 | Informed consent materials    | 32  | Model consent form and other related documentation given to participants and authorised surrogates                                                                                                                                                                                  |       |
| 32 |                               |     |                                                                                                                                                                                                                                                                                     |       |
| 33 |                               |     |                                                                                                                                                                                                                                                                                     |       |
| 34 | Biological specimens          | 33  | Plans for collection, laboratory evaluation, and storage of biological specimens for genetic or molecular analysis in the current trial and for future use in ancillary studies, if applicable                                                                                      |       |
| 35 |                               |     |                                                                                                                                                                                                                                                                                     |       |
| 36 |                               |     |                                                                                                                                                                                                                                                                                     |       |

37 \*It is strongly recommended that this checklist be read in conjunction with the SPIRIT 2013 Explanation & Elaboration for important clarification on the items.  
 38 Amendments to the protocol should be tracked and dated. The SPIRIT checklist is copyrighted by the SPIRIT Group under the Creative Commons  
 39 "[Attribution-NonCommercial-NoDerivs 3.0 Unported](https://creativecommons.org/licenses/by-nc-nd/3.0/)" license.  
 40

41  
 42  
 43  
 44  
 45  
 46  
 47
